# Supplementary material
Source: publisher figshare collection journal article supplement (https://gsajournals.figshare.com/ndownloader/files/13109786)
Supplement: Supplementary file 1 [file 13109786]

## Sheet: Sheet1
Chrom = 2L					Chrom = 2R					Chrom = 3L					Chrom = 3R					Chrom = X					Distance category	All sites in this range
window	distance category	No. SNP pairs	mean r^2		window	distance category	No. SNP pairs	mean r^2		window	distance category	No. SNP pairs	mean r^2		window	distance category	No. SNP pairs	mean r^2		window	distance category	No. SNP pairs	mean r^2		0	1-10
																									1	11-100
0	0	44	0.927138		0	0	5	0.847146		0	0	32	0.730246		0	0	353	0.624185		0	0	1	1		2	101-1000
100000	0	149	0.755827		100000	0	106	0.691127		100000	0	47	0.865371		100000	0	248	0.462715		100000	0	0			3	1001-10000
200000	0	276	0.628763		200000	0	3	1		200000	0	234	0.551338		200000	0	566	0.470677		200000	0	11	1		4	10001-100000
300000	0	174	0.884968		300000	0	107	0.773759		300000	0	693	0.531478		300000	0	736	0.549638		300000	0	31	0.996952		5	100001-300000
400000	0	392	0.582699		400000	0	0			400000	0	1244	0.44024		400000	0	503	0.532395		400000	0	33	0.985991
500000	0	724	0.519245		500000	0	6	0.491787		500000	0	536	0.513266		500000	0	603	0.557941		500000	0	36	0.936785
600000	0	856	0.524973		600000	0	24	0.671891		600000	0	863	0.439977		600000	0	506	0.532392		600000	0	84	0.883195
700000	0	818	0.587273		700000	0	25	0.463366		700000	0	1225	0.483297		700000	0	593	0.482302		700000	0	212	0.778179
800000	0	1176	0.488763		800000	0	55	0.432332		800000	0	1034	0.501742		800000	0	968	0.490225		800000	0	176	0.736108
900000	0	1486	0.373178		900000	0	18	0.742764		900000	0	1335	0.438386		900000	0	743	0.496181		900000	0	85	0.912319
1000000	0	1345	0.459328		1000000	0	72	0.897698		1000000	0	1355	0.40957		1000000	0	781	0.507653		1000000	0	123	0.767096
1100000	0	1382	0.443359		1100000	0	5	0.398499		1100000	0	1091	0.503671		1100000	0	1014	0.47066		1100000	0	74	0.736576
1200000	0	1166	0.509079		1200000	0	5	0.441857		1200000	0	891	0.514684		1200000	0	774	0.491142		1200000	0	45	0.790818
1300000	0	1163	0.41633		1300000	0	25	0.714018		1300000	0	1230	0.485653		1300000	0	479	0.461694		1300000	0	66	0.921911
1400000	0	901	0.543008		1400000	0	8	0.863076		1400000	0	1152	0.428582		1400000	0	1016	0.488949		1400000	0	58	0.737085
1500000	0	1775	0.39281		1500000	0	1	1		1500000	0	773	0.400297		1500000	0	599	0.516763		1500000	0	95	0.817919
1600000	0	1030	0.421735		1600000	0	13	0.629394		1600000	0	860	0.377998		1600000	0	544	0.577308		1600000	0	82	0.775773
1700000	0	718	0.487627		1700000	0	28	0.791291		1700000	0	1002	0.421159		1700000	0	558	0.641207		1700000	0	149	0.690887
1800000	0	1037	0.511729		1800000	0	7	0.978215		1800000	0	1067	0.462338		1800000	0	348	0.707849		1800000	0	41	0.918536
1900000	0	635	0.58187		1900000	0	219	0.687263		1900000	0	724	0.49711		1900000	0	298	0.63076		1900000	0	169	0.793557
2000000	0	605	0.491575		2000000	0	285	0.658775		2000000	0	987	0.553318		2000000	0	629	0.568856		2000000	0	306	0.568746
2100000	0	874	0.525092		2100000	0	202	0.627717		2100000	0	967	0.520378		2100000	0	1085	0.50677		2100000	0	455	0.563039
2200000	0	1488	0.449697		2200000	0	210	0.584901		2200000	0	1142	0.484093		2200000	0	494	0.646104		2200000	0	844	0.572293
2300000	0	797	0.556929		2300000	0	103	0.627853		2300000	0	779	0.571859		2300000	0	446	0.668409		2300000	0	514	0.672346
2400000	0	1025	0.473579		2400000	0	899	0.572316		2400000	0	966	0.544557		2400000	0	583	0.606167		2400000	0	730	0.587018
2500000	0	1019	0.483918		2500000	0	1458	0.537637		2500000	0	769	0.491076		2500000	0	372	0.626637		2500000	0	629	0.615228
2600000	0	1102	0.492846		2600000	0	1078	0.551609		2600000	0	803	0.492609		2600000	0	380	0.588429		2600000	0	673	0.696
2700000	0	1245	0.473173		2700000	0	1381	0.615061		2700000	0	927	0.527224		2700000	0	1342	0.497934		2700000	0	1155	0.546486
2800000	0	635	0.62679		2800000	0	564	0.590078		2800000	0	707	0.530981		2800000	0	929	0.595139		2800000	0	1035	0.510483
2900000	0	913	0.447499		2900000	0	924	0.573069		2900000	0	819	0.497502		2900000	0	919	0.476282		2900000	0	1154	0.452109
3000000	0	1141	0.494079		3000000	0	906	0.622098		3000000	0	103	0.636827		3000000	0	895	0.560894		3000000	0	826	0.479978
3100000	0	921	0.576116		3100000	0	556	0.618608		3100000	0	706	0.487514		3100000	0	1140	0.531436		3100000	0	322	0.599261
3200000	0	1265	0.492917		3200000	0	530	0.524904		3200000	0	731	0.494945		3200000	0	1372	0.529054		3200000	0	747	0.493016
3300000	0	1490	0.409753		3300000	0	779	0.560009		3300000	0	1020	0.471707		3300000	0	762	0.622148		3300000	0	367	0.530438
3400000	0	1151	0.467079		3400000	0	276	0.765941		3400000	0	1684	0.418477		3400000	0	594	0.632291		3400000	0	395	0.490467
3500000	0	1469	0.491862		3500000	0	606	0.614904		3500000	0	940	0.425873		3500000	0	1009	0.511731		3500000	0	406	0.516524
3600000	0	805	0.599918		3600000	0	829	0.590982		3600000	0	1377	0.444857		3600000	0	715	0.521822		3600000	0	289	0.591362
3700000	0	1691	0.490525		3700000	0	1435	0.486004		3700000	0	1110	0.525742		3700000	0	849	0.520723		3700000	0	246	0.540145
3800000	0	1230	0.582833		3800000	0	1428	0.504176		3800000	0	1107	0.526652		3800000	0	1580	0.423974		3800000	0	230	0.52226
3900000	0	991	0.583471		3900000	0	1015	0.493498		3900000	0	633	0.46175		3900000	0	1050	0.526153		3900000	0	421	0.564462
4000000	0	1465	0.491103		4000000	0	1136	0.48253		4000000	0	945	0.472518		4000000	0	1159	0.481407		4000000	0	643	0.541195
4100000	0	957	0.49108		4100000	0	1480	0.508641		4100000	0	1290	0.491898		4100000	0	773	0.556826		4100000	0	581	0.668657
4200000	0	825	0.546812		4200000	0	840	0.531743		4200000	0	1073	0.49977		4200000	0	1149	0.4687		4200000	0	544	0.561491
4300000	0	654	0.471176		4300000	0	1575	0.481717		4300000	0	1396	0.522854		4300000	0	1829	0.453363		4300000	0	618	0.652099
4400000	0	705	0.586613		4400000	0	1633	0.447783		4400000	0	1143	0.486787		4400000	0	817	0.529495		4400000	0	910	0.529286
4500000	0	1065	0.498596		4500000	0	1117	0.530967		4500000	0	1567	0.431928		4500000	0	723	0.6099		4500000	0	1002	0.548253
4600000	0	1066	0.570887		4600000	0	883	0.56816		4600000	0	1339	0.494146		4600000	0	630	0.682351		4600000	0	763	0.523023
4700000	0	835	0.559571		4700000	0	1691	0.462728		4700000	0	841	0.57694		4700000	0	712	0.519798		4700000	0	475	0.607092
4800000	0	1004	0.451968		4800000	0	1180	0.503976		4800000	0	492	0.61639		4800000	0	871	0.563975		4800000	0	927	0.494652
4900000	0	1142	0.422657		4900000	0	1300	0.573188		4900000	0	1150	0.438613		4900000	0	702	0.547652		4900000	0	668	0.53418
5000000	0	941	0.540811		5000000	0	1267	0.514704		5000000	0	952	0.490437		5000000	0	1067	0.531738		5000000	0	833	0.528542
5100000	0	1738	0.434259		5100000	0	951	0.564521		5100000	0	1028	0.504792		5100000	0	1305	0.467105		5100000	0	1244	0.461816
5200000	0	1773	0.432403		5200000	0	1484	0.518351		5200000	0	1111	0.596235		5200000	0	1207	0.480376		5200000	0	1157	0.506704
5300000	0	1809	0.407034		5300000	0	1305	0.521555		5300000	0	920	0.580068		5300000	0	695	0.564969		5300000	0	821	0.495751
5400000	0	905	0.597948		5400000	0	703	0.578609		5400000	0	682	0.594995		5400000	0	887	0.494506		5400000	0	888	0.530291
5500000	0	1560	0.481566		5500000	0	849	0.502998		5500000	0	614	0.535687		5500000	0	1068	0.449314		5500000	0	797	0.652649
5600000	0	1474	0.519834		5600000	0	751	0.572695		5600000	0	373	0.672391		5600000	0	1103	0.547909		5600000	0	480	0.668448
5700000	0	591	0.653209		5700000	0	1112	0.477375		5700000	0	1009	0.483781		5700000	0	1210	0.442207		5700000	0	451	0.868995
5800000	0	1295	0.531523		5800000	0	854	0.526736		5800000	0	1003	0.482236		5800000	0	1560	0.460422		5800000	0	571	0.783074
5900000	0	1215	0.476646		5900000	0	1220	0.458503		5900000	0	962	0.483641		5900000	0	1804	0.491096		5900000	0	275	0.9607
6000000	0	1451	0.443788		6000000	0	1102	0.516883		6000000	0	452	0.60663		6000000	0	1187	0.505103		6000000	0	455	0.796631
6100000	0	1259	0.545511		6100000	0	1284	0.445883		6100000	0	1126	0.518969		6100000	0	1421	0.435306		6100000	0	389	0.686454
6200000	0	904	0.565453		6200000	0	840	0.491366		6200000	0	678	0.506666		6200000	0	1505	0.486621		6200000	0	381	0.600939
6300000	0	1115	0.482359		6300000	0	1175	0.456338		6300000	0	1411	0.450155		6300000	0	969	0.4564		6300000	0	329	0.614715
6400000	0	707	0.534267		6400000	0	905	0.556799		6400000	0	1067	0.526638		6400000	0	1012	0.473644		6400000	0	763	0.468756
6500000	0	918	0.561477		6500000	0	312	0.749234		6500000	0	816	0.493168		6500000	0	869	0.557984		6500000	0	502	0.688595
6600000	0	1033	0.488098		6600000	0	450	0.637304		6600000	0	1153	0.450076		6600000	0	1009	0.571728		6600000	0	786	0.543021
6700000	0	988	0.484479		6700000	0	685	0.546462		6700000	0	1695	0.413046		6700000	0	1442	0.448202		6700000	0	862	0.49049
6800000	0	1616	0.456255		6800000	0	1277	0.536122		6800000	0	1759	0.431824		6800000	0	1031	0.570839		6800000	0	497	0.731031
6900000	0	1793	0.447264		6900000	0	1493	0.451726		6900000	0	1163	0.390953		6900000	0	1844	0.376734		6900000	0	417	0.608654
7000000	0	1191	0.472041		7000000	0	1722	0.485101		7000000	0	1356	0.424292		7000000	0	972	0.464925		7000000	0	383	0.572932
7100000	0	1625	0.494441		7100000	0	1103	0.440001		7100000	0	1121	0.473542		7100000	0	1593	0.470965		7100000	0	214	0.582616
7200000	0	1249	0.463188		7200000	0	1819	0.457926		7200000	0	926	0.527171		7200000	0	1167	0.480698		7200000	0	478	0.708718
7300000	0	1933	0.42202		7300000	0	578	0.580637		7300000	0	1416	0.422633		7300000	0	1346	0.495732		7300000	0	414	0.600786
7400000	0	1431	0.495702		7400000	0	786	0.502579		7400000	0	1738	0.422061		7400000	0	1431	0.419697		7400000	0	453	0.686524
7500000	0	1281	0.466587		7500000	0	1297	0.506882		7500000	0	1168	0.38814		7500000	0	1204	0.491021		7500000	0	535	0.52804
7600000	0	1337	0.440672		7600000	0	775	0.454886		7600000	0	1449	0.416583		7600000	0	1477	0.405928		7600000	0	808	0.539393
7700000	0	1107	0.489385		7700000	0	1231	0.574412		7700000	0	1273	0.431571		7700000	0	1369	0.419192		7700000	0	691	0.623174
7800000	0	943	0.560693		7800000	0	1508	0.483569		7800000	0	1501	0.395559		7800000	0	1857	0.426175		7800000	0	639	0.750206
7900000	0	1273	0.511441		7900000	0	1352	0.488304		7900000	0	622	0.552775		7900000	0	1828	0.419708		7900000	0	814	0.596135
8000000	0	1633	0.444478		8000000	0	1397	0.49199		8000000	0	537	0.612738		8000000	0	1501	0.45748		8000000	0	658	0.616947
8100000	0	1065	0.49729		8100000	0	1494	0.430616		8100000	0	827	0.493334		8100000	0	1128	0.521259		8100000	0	702	0.781125
8200000	0	1465	0.445265		8200000	0	1402	0.491174		8200000	0	872	0.45567		8200000	0	1034	0.557018		8200000	0	917	0.621469
8300000	0	1340	0.470647		8300000	0	625	0.679438		8300000	0	1057	0.456269		8300000	0	1233	0.445529		8300000	0	1270	0.550455
8400000	0	1402	0.499886		8400000	0	511	0.671356		8400000	0	1020	0.438068		8400000	0	1171	0.485442		8400000	0	859	0.706095
8500000	0	996	0.458607		8500000	0	543	0.713321		8500000	0	793	0.484266		8500000	0	1189	0.517636		8500000	0	803	0.610575
8600000	0	1214	0.45334		8600000	0	835	0.560958		8600000	0	898	0.505369		8600000	0	697	0.546472		8600000	0	227	0.78123
8700000	0	840	0.609584		8700000	0	114	0.845336		8700000	0	813	0.455992		8700000	0	666	0.496916		8700000	0	178	0.828156
8800000	0	1421	0.463157		8800000	0	672	0.76451		8800000	0	936	0.45365		8800000	0	1000	0.421448		8800000	0	583	0.618576
8900000	0	1050	0.516834		8900000	0	837	0.548505		8900000	0	716	0.442212		8900000	0	1051	0.411435		8900000	0	558	0.564874
9000000	0	1133	0.587935		9000000	0	522	0.66141		9000000	0	1001	0.436246		9000000	0	1285	0.362604		9000000	0	52	0.986548
9100000	0	1187	0.487361		9100000	0	1034	0.506566		9100000	0	1030	0.484783		9100000	0	976	0.402372		9100000	0	73	0.807786
9200000	0	1189	0.483852		9200000	0	1336	0.522528		9200000	0	912	0.47965		9200000	0	1304	0.444067		9200000	0	277	0.623326
9300000	0	1189	0.437003		9300000	0	1233	0.574403		9300000	0	744	0.575146		9300000	0	1021	0.416365		9300000	0	412	0.490935
9400000	0	935	0.471342		9400000	0	1146	0.502626		9400000	0	1004	0.518051		9400000	0	1118	0.378759		9400000	0	264	0.664069
9500000	0	989	0.444562		9500000	0	2127	0.439285		9500000	0	1306	0.423375		9500000	0	1115	0.467323		9500000	0	512	0.503205
9600000	0	1375	0.40422		9600000	0	1423	0.489285		9600000	0	1099	0.433429		9600000	0	1214	0.521465		9600000	0	66	0.753441
9700000	0	1495	0.435844		9700000	0	587	0.624047		9700000	0	1271	0.430256		9700000	0	1381	0.460325		9700000	0	132	0.708868
9800000	0	1343	0.48946		9800000	0	710	0.592216		9800000	0	1258	0.43362		9800000	0	1311	0.515476		9800000	0	302	0.583863
9900000	0	1295	0.481037		9900000	0	1214	0.47978		9900000	0	1339	0.451713		9900000	0	961	0.4449		9900000	0	506	0.550954
10000000	0	1411	0.521472		10000000	0	1330	0.504751		10000000	0	1532	0.387115		10000000	0	918	0.440357		10000000	0	617	0.458825
10100000	0	1608	0.491091		10100000	0	1133	0.541155		10100000	0	1549	0.435892		10100000	0	970	0.488437		10100000	0	463	0.521598
10200000	0	1684	0.513222		10200000	0	757	0.546984		10200000	0	1533	0.491653		10200000	0	1371	0.402035		10200000	0	599	0.513086
10300000	0	1522	0.459397		10300000	0	1052	0.474578		10300000	0	1485	0.428779		10300000	0	1118	0.533545		10300000	0	567	0.575494
10400000	0	1424	0.449449		10400000	0	1345	0.472059		10400000	0	1559	0.470284		10400000	0	1573	0.409611		10400000	0	391	0.767671
10500000	0	1462	0.450453		10500000	0	670	0.553981		10500000	0	1169	0.525589		10500000	0	1292	0.398957		10500000	0	497	0.763743
10600000	0	1199	0.477463		10600000	0	1110	0.499839		10600000	0	1574	0.373906		10600000	0	1411	0.415597		10600000	0	268	0.77103
10700000	0	1625	0.504442		10700000	0	863	0.54175		10700000	0	1339	0.437274		10700000	0	1911	0.415926		10700000	0	794	0.538435
10800000	0	1736	0.467088		10800000	0	761	0.553132		10800000	0	1728	0.455469		10800000	0	1472	0.464576		10800000	0	562	0.494071
10900000	0	1786	0.409589		10900000	0	1245	0.463238		10900000	0	1542	0.475368		10900000	0	870	0.536817		10900000	0	475	0.508026
11000000	0	1646	0.444763		11000000	0	899	0.454095		11000000	0	1755	0.436027		11000000	0	1461	0.454005		11000000	0	432	0.571604
11100000	0	1368	0.494428		11100000	0	976	0.533911		11100000	0	2435	0.408348		11100000	0	1230	0.437427		11100000	0	210	0.515523
11200000	0	991	0.512648		11200000	0	855	0.576148		11200000	0	1393	0.498798		11200000	0	1197	0.488069		11200000	0	483	0.473056
11300000	0	1286	0.452712		11300000	0	1215	0.50841		11300000	0	1764	0.454106		11300000	0	1282	0.497192		11300000	0	847	0.590481
11400000	0	1248	0.485258		11400000	0	1563	0.518033		11400000	0	1349	0.473711		11400000	0	1255	0.406528		11400000	0	559	0.672394
11500000	0	1113	0.527043		11500000	0	1280	0.485959		11500000	0	1230	0.437061		11500000	0	1654	0.427932		11500000	0	528	0.629007
11600000	0	1440	0.468468		11600000	0	1071	0.531463		11600000	0	1317	0.51676		11600000	0	1423	0.464467		11600000	0	786	0.514767
11700000	0	1184	0.499725		11700000	0	898	0.560952		11700000	0	2177	0.416954		11700000	0	626	0.653551		11700000	0	1177	0.499035
11800000	0	1686	0.497906		11800000	0	444	0.763174		11800000	0	1669	0.454737		11800000	0	604	0.60264		11800000	0	591	0.573038
11900000	0	1507	0.520529		11900000	0	624	0.566577		11900000	0	1818	0.454157		11900000	0	1263	0.530053		11900000	0	452	0.66683
12000000	0	1557	0.471991		12000000	0	660	0.602437		12000000	0	1830	0.45332		12000000	0	1177	0.552583		12000000	0	682	0.616228
12100000	0	1148	0.571076		12100000	0	1360	0.459621		12100000	0	1791	0.432992		12100000	0	876	0.603468		12100000	0	900	0.617287
12200000	0	2086	0.447415		12200000	0	980	0.524717		12200000	0	2006	0.415923		12200000	0	1567	0.468822		12200000	0	661	0.628626
12300000	0	1094	0.556709		12300000	0	1024	0.502741		12300000	0	1337	0.499118		12300000	0	994	0.512793		12300000	0	567	0.630047
12400000	0	1023	0.601963		12400000	0	883	0.473394		12400000	0	1216	0.498702		12400000	0	1068	0.479305		12400000	0	393	0.693211
12500000	0	628	0.719182		12500000	0	687	0.529928		12500000	0	1124	0.492978		12500000	0	1179	0.618589		12500000	0	724	0.629956
12600000	0	1210	0.488743		12600000	0	1004	0.497828		12600000	0	1048	0.456111		12600000	0	848	0.551927		12600000	0	476	0.75003
12700000	0	1475	0.501314		12700000	0	1157	0.428371		12700000	0	1052	0.464137		12700000	0	1054	0.523227		12700000	0	729	0.615541
12800000	0	916	0.528754		12800000	0	901	0.489302		12800000	0	1093	0.54589		12800000	0	811	0.581935		12800000	0	552	0.517531
12900000	0	1028	0.587565		12900000	0	976	0.484097		12900000	0	998	0.476167		12900000	0	1215	0.501374		12900000	0	455	0.754304
13000000	0	1085	0.49468		13000000	0	1114	0.530091		13000000	0	801	0.555462		13000000	0	930	0.523136		13000000	0	650	0.582275
13100000	0	813	0.621171		13100000	0	1291	0.489371		13100000	0	917	0.592781		13100000	0	1023	0.500011		13100000	0	927	0.579326
13200000	0	1347	0.535848		13200000	0	949	0.577288		13200000	0	337	0.529135		13200000	0	1189	0.493118		13200000	0	659	0.600541
13300000	0	1233	0.507107		13300000	0	1553	0.500643		13300000	0	643	0.475204		13300000	0	1058	0.500425		13300000	0	658	0.594067
13400000	0	1168	0.453633		13400000	0	1085	0.563162		13400000	0	863	0.535672		13400000	0	1122	0.462493		13400000	0	537	0.61983
13500000	0	1205	0.524652		13500000	0	1305	0.470201		13500000	0	1356	0.408433		13500000	0	987	0.424929		13500000	0	921	0.614856
13600000	0	1081	0.462974		13600000	0	977	0.45517		13600000	0	1402	0.447138		13600000	0	866	0.496339		13600000	0	1353	0.608142
13700000	0	899	0.464585		13700000	0	1002	0.576597		13700000	0	999	0.584796		13700000	0	855	0.484095		13700000	0	1024	0.625677
13800000	0	1558	0.465223		13800000	0	503	0.606937		13800000	0	841	0.56363		13800000	0	567	0.536246		13800000	0	845	0.553317
13900000	0	1632	0.448124		13900000	0	648	0.530241		13900000	0	1158	0.461174		13900000	0	991	0.450951		13900000	0	1197	0.515988
14000000	0	1124	0.481866		14000000	0	1012	0.51305		14000000	0	971	0.477174		14000000	0	461	0.490302		14000000	0	810	0.586455
14100000	0	1291	0.447611		14100000	0	626	0.599308		14100000	0	1609	0.418771		14100000	0	1204	0.431519		14100000	0	711	0.680492
14200000	0	1470	0.481501		14200000	0	1406	0.495649		14200000	0	1904	0.389593		14200000	0	878	0.456607		14200000	0	515	0.703978
14300000	0	1370	0.502382		14300000	0	1160	0.460151		14300000	0	1184	0.506111		14300000	0	1294	0.442051		14300000	0	286	0.818416
14400000	0	1051	0.547409		14400000	0	1180	0.553068		14400000	0	1244	0.468556		14400000	0	1438	0.408036		14400000	0	593	0.741488
14500000	0	1742	0.465031		14500000	0	1102	0.540403		14500000	0	1276	0.524548		14500000	0	1143	0.482105		14500000	0	445	0.636432
14600000	0	1449	0.482964		14600000	0	1144	0.497493		14600000	0	1411	0.500855		14600000	0	981	0.438496		14600000	0	332	0.735942
14700000	0	1150	0.436364		14700000	0	1119	0.473877		14700000	0	1517	0.417365		14700000	0	1010	0.455299		14700000	0	418	0.687695
14800000	0	510	0.425148		14800000	0	1365	0.453151		14800000	0	2007	0.426655		14800000	0	1611	0.399696		14800000	0	142	0.630931
14900000	0	1842	0.44107		14900000	0	1407	0.545075		14900000	0	1543	0.447228		14900000	0	1111	0.470458		14900000	0	72	0.401379
15000000	0	1963	0.368606		15000000	0	1251	0.495689		15000000	0	1263	0.50303		15000000	0	1282	0.434008		15000000	0	294	0.592762
15100000	0	1412	0.473163		15100000	0	1051	0.450236		15100000	0	947	0.527704		15100000	0	1345	0.406713		15100000	0	940	0.643837
15200000	0	1150	0.545776		15200000	0	845	0.578284		15200000	0	1339	0.479912		15200000	0	603	0.466804		15200000	0	1005	0.558242
15300000	0	1435	0.496498		15300000	0	915	0.531083		15300000	0	1526	0.409411		15300000	0	1420	0.399809		15300000	0	629	0.510233
15400000	0	1162	0.517092		15400000	0	869	0.502754		15400000	0	1616	0.408345		15400000	0	834	0.399638		15400000	0	368	0.643073
15500000	0	623	0.514759		15500000	0	1134	0.422461		15500000	0	1729	0.402635		15500000	0	1346	0.405576		15500000	0	718	0.48158
15600000	0	1156	0.543558		15600000	0	1174	0.507208		15600000	0	1497	0.436509		15600000	0	828	0.413591		15600000	0	691	0.665572
15700000	0	1103	0.529214		15700000	0	1310	0.445228		15700000	0	1361	0.448704		15700000	0	919	0.45093		15700000	0	839	0.60153
15800000	0	1510	0.444985		15800000	0	963	0.420891		15800000	0	1551	0.52882		15800000	0	1660	0.429467		15800000	0	822	0.601948
15900000	0	2184	0.410265		15900000	0	1233	0.489307		15900000	0	1305	0.493229		15900000	0	1556	0.438519		15900000	0	804	0.558034
16000000	0	1264	0.54995		16000000	0	571	0.566441		16000000	0	1460	0.442977		16000000	0	1425	0.41772		16000000	0	732	0.644698
16100000	0	1470	0.511035		16100000	0	1030	0.4413		16100000	0	1161	0.439424		16100000	0	929	0.426736		16100000	0	578	0.584467
16200000	0	1156	0.527847		16200000	0	1039	0.479187		16200000	0	1128	0.490741		16200000	0	1784	0.436993		16200000	0	132	0.641495
16300000	0	1069	0.535289		16300000	0	527	0.557125		16300000	0	1470	0.447027		16300000	0	1123	0.504588		16300000	0	549	0.586211
16400000	0	1404	0.592313		16400000	0	539	0.633138		16400000	0	1302	0.478021		16400000	0	1296	0.484442		16400000	0	603	0.58649
16500000	0	1282	0.520592		16500000	0	663	0.508739		16500000	0	1437	0.402		16500000	0	1209	0.470326		16500000	0	449	0.684838
16600000	0	1595	0.460435		16600000	0	734	0.626235		16600000	0	1191	0.481462		16600000	0	1242	0.432306		16600000	0	298	0.787059
16700000	0	1496	0.534607		16700000	0	1103	0.5285		16700000	0	1313	0.520465		16700000	0	601	0.377581		16700000	0	999	0.57578
16800000	0	1235	0.581149		16800000	0	1282	0.446192		16800000	0	1308	0.467981		16800000	0	673	0.447512		16800000	0	641	0.624484
16900000	0	1250	0.479599		16900000	0	852	0.527282		16900000	0	679	0.530133		16900000	0	738	0.454778		16900000	0	395	0.781333
17000000	0	1129	0.541914		17000000	0	1479	0.458		17000000	0	1569	0.465274		17000000	0	1024	0.443753		17000000	0	641	0.657812
17100000	0	1050	0.617556		17100000	0	1190	0.43888		17100000	0	1238	0.41177		17100000	0	770	0.419028		17100000	0	398	0.621588
17200000	0	726	0.601308		17200000	0	1114	0.456974		17200000	0	1751	0.466328		17200000	0	1256	0.450664		17200000	0	585	0.636931
17300000	0	1426	0.469854		17300000	0	1176	0.467036		17300000	0	404	0.56972		17300000	0	1406	0.425314		17300000	0	576	0.697429
17400000	0	1198	0.484444		17400000	0	1405	0.445268		17400000	0	800	0.495755		17400000	0	1341	0.461966		17400000	0	756	0.567042
17500000	0	1120	0.501432		17500000	0	1506	0.49116		17500000	0	1273	0.450844		17500000	0	1057	0.440973		17500000	0	664	0.630014
17600000	0	864	0.558409		17600000	0	1193	0.467874		17600000	0	1928	0.444582		17600000	0	1177	0.436184		17600000	0	495	0.64051
17700000	0	978	0.433213		17700000	0	1089	0.436509		17700000	0	1818	0.412568		17700000	0	938	0.462543		17700000	0	785	0.608271
17800000	0	822	0.558473		17800000	0	1155	0.489561		17800000	0	94	0.535573		17800000	0	421	0.59683		17800000	0	603	0.705948
17900000	0	1006	0.520269		17900000	0	756	0.578192		17900000	0	2084	0.439984		17900000	0	1226	0.469195		17900000	0	705	0.719896
18000000	0	1045	0.604687		18000000	0	716	0.508785		18000000	0	2017	0.452811		18000000	0	1187	0.434336		18000000	0	1178	0.524725
18100000	0	803	0.633297		18100000	0	1387	0.465052		18100000	0	1514	0.544301		18100000	0	1180	0.457695		18100000	0	1672	0.479792
18200000	0	1016	0.554918		18200000	0	1046	0.530192		18200000	0	2251	0.489895		18200000	0	998	0.523674		18200000	0	667	0.588419
18300000	0	1125	0.477964		18300000	0	981	0.527157		18300000	0	1929	0.483342		18300000	0	1016	0.415018		18300000	0	759	0.672867
18400000	0	1081	0.50065		18400000	0	1111	0.520704		18400000	0	1328	0.558624		18400000	0	1305	0.433454		18400000	0	328	0.624408
18500000	0	663	0.593139		18500000	0	881	0.46817		18500000	0	1821	0.515478		18500000	0	1103	0.473057		18500000	0	652	0.606884
18600000	0	973	0.529268		18600000	0	917	0.4521		18600000	0	1355	0.500085		18600000	0	1148	0.454786		18600000	0	679	0.684854
18700000	0	1351	0.416921		18700000	0	657	0.552155		18700000	0	779	0.487406		18700000	0	1051	0.472742		18700000	0	935	0.562105
18800000	0	1534	0.436366		18800000	0	880	0.507456		18800000	0	1459	0.499053		18800000	0	785	0.446071		18800000	0	521	0.680448
18900000	0	1360	0.48659		18900000	0	876	0.475971		18900000	0	1770	0.497863		18900000	0	870	0.42407		18900000	0	876	0.57475
19000000	0	843	0.536364		19000000	0	651	0.534023		19000000	0	1216	0.513232		19000000	0	599	0.469549		19000000	0	484	0.71358
19100000	0	1059	0.517545		19100000	0	994	0.487537		19100000	0	1376	0.540368		19100000	0	379	0.610036		19100000	0	565	0.682614
19200000	0	981	0.530764		19200000	0	1170	0.455939		19200000	0	1485	0.486687		19200000	0	878	0.518171		19200000	0	841	0.632988
19300000	0	1615	0.452494		19300000	0	764	0.50011		19300000	0	1330	0.529971		19300000	0	1069	0.408002		19300000	0	360	0.686961
19400000	0	1323	0.570676		19400000	0	1410	0.500552		19400000	0	535	0.568486		19400000	0	1165	0.393846		19400000	0	318	0.577106
19500000	0	1509	0.465423		19500000	0	676	0.601569		19500000	0	1408	0.476209		19500000	0	709	0.465249		19500000	0	587	0.492923
19600000	0	179	0.630536		19600000	0	623	0.631692		19600000	0	1255	0.498258		19600000	0	1163	0.447319		19600000	0	532	0.583407
19700000	0	900	0.50874		19700000	0	383	0.610573		19700000	0	1286	0.484873		19700000	0	1071	0.447543		19700000	0	164	0.645334
19800000	0	1202	0.47075		19800000	0	828	0.531178		19800000	0	962	0.524018		19800000	0	1296	0.448331		19800000	0	379	0.618269
19900000	0	1426	0.521785		19900000	0	736	0.539962		19900000	0	1344	0.461016		19900000	0	887	0.459406		19900000	0	233	0.842553
20000000	0	721	0.577156		20000000	0	1094	0.44105		20000000	0	1260	0.548463		20000000	0	787	0.462056		20000000	0	339	0.66519
20100000	0	720	0.504225		20100000	0	909	0.480766		20100000	0	1410	0.465048		20100000	0	939	0.518395		20100000	0	332	0.655043
20200000	0	1084	0.488031		20200000	0	1207	0.430765		20200000	0	1362	0.46088		20200000	0	802	0.503684		20200000	0	7	0.778843
20300000	0	818	0.478319		20300000	0	1040	0.361382		20300000	0	890	0.469637		20300000	0	687	0.502256		20300000	0	29	0.787929
20400000	0	564	0.447174		20400000	0	678	0.464928		20400000	0	1300	0.437172		20400000	0	1457	0.44453		20400000	0	33	0.659907
20500000	0	177	0.481362		20500000	0	1049	0.408534		20500000	0	1364	0.448763		20500000	0	1243	0.46335		20500000	0	133	0.608018
20600000	0	54	0.496722		20600000	0	1482	0.347903		20600000	0	1288	0.472241		20600000	0	995	0.582123		20600000	0	182	0.577314
20700000	0	30	0.707719		20700000	0	855	0.495579		20700000	0	648	0.560542		20700000	0	1009	0.490506		20700000	0	450	0.657739
20800000	0	19	0.819164		20800000	0	902	0.426337		20800000	0	477	0.523748		20800000	0	1177	0.481351		20800000	0	195	0.556068
20900000	0	6	0.837055		20900000	0	889	0.414186		20900000	0	684	0.537665		20900000	0	1081	0.47837		0	1	2	1
21000000	0	46	0.711069		21000000	0	956	0.433346		21000000	0	332	0.593637		21000000	0	1292	0.494756		100000	1	0
21100000	0	76	0.656949		21100000	0	492	0.549666		21100000	0	575	0.555214		21100000	0	1361	0.474218		200000	1	43	0.998017
21200000	0	78	0.709303		21200000	0	293	0.54601		21200000	0	615	0.520337		21200000	0	1325	0.430883		300000	1	87	0.976144
21300000	0	68	0.546605		21300000	0	239	0.527494		21300000	0	656	0.619227		21300000	0	1323	0.438389		400000	1	111	0.971881
21400000	0	36	0.610965		21400000	0	106	0.556522		21400000	0	305	0.623617		21400000	0	1145	0.511929		500000	1	262	0.893447
21500000	0	103	0.667963		21500000	0	136	0.602361		21500000	0	227	0.793497		21500000	0	871	0.532245		600000	1	342	0.717145
21600000	0	25	0.612469		0	1	40	0.403975		21600000	0	418	0.653434		21600000	0	778	0.542539		700000	1	982	0.59343
21700000	0	17	0.630152		100000	1	607	0.47942		21700000	0	246	0.644569		21700000	0	1121	0.475949		800000	1	1066	0.610223
21800000	0	7	0.739482		200000	1	4	0.759443		21800000	0	210	0.557477		21800000	0	926	0.450976		900000	1	406	0.852033
21900000	0	19	0.794022		300000	1	600	0.617303		21900000	0	419	0.524792		21900000	0	1015	0.378234		1000000	1	703	0.658009
22000000	0	1	1		400000	1	0			22000000	0	394	0.540082		22000000	0	1074	0.40721		1100000	1	454	0.653436
22100000	0	17	0.771979		500000	1	35	0.488231		22100000	0	892	0.503005		22100000	0	639	0.572027		1200000	1	258	0.565382
22200000	0	6	0.842119		600000	1	120	0.403174		22200000	0	878	0.498472		22200000	0	871	0.615943		1300000	1	268	0.880501
22300000	0	1	1		700000	1	177	0.438193		22300000	0	983	0.509068		22300000	0	1223	0.530966		1400000	1	333	0.710928
22400000	0	31	0.795544		800000	1	313	0.333926		22400000	0	1412	0.650323		22400000	0	913	0.554254		1500000	1	404	0.757273
22500000	0	1	1		900000	1	162	0.388389		22500000	0	420	0.615422		22500000	0	487	0.590504		1600000	1	519	0.707183
22600000	0	0			1000000	1	433	0.804669		22600000	0	1	0.0263692		22600000	0	913	0.465934		1700000	1	914	0.55186
22700000	0	10	0.903972		1100000	1	36	0.227518		22700000	0	29	0.590393		22700000	0	783	0.555333		1800000	1	227	0.827908
22800000	0	22	0.848935		1200000	1	14	0.313886		22800000	0	1	1		22800000	0	1027	0.468795		1900000	1	1195	0.729738
22900000	0	19	0.750338		1300000	1	129	0.536764		22900000	0	4	0.802473		22900000	0	996	0.495573		2000000	1	1932	0.463968
23000000	0	16	0.967225		1400000	1	56	0.586767		23000000	0	75	0.694739		23000000	0	769	0.483617		2100000	1	3120	0.487671
23100000	0	76	0.802474		1500000	1	0			23100000	0	220	0.737448		23100000	0	861	0.454111		2200000	1	5207	0.421161
23200000	0	17	0.935091		1600000	1	25	0.41876		23200000	0	53	0.622074		23200000	0	1094	0.436311		2300000	1	3157	0.528131
23300000	0	8	0.594429		1700000	1	81	0.360698		23300000	0	40	0.975595		23300000	0	876	0.409837		2400000	1	4266	0.443048
23400000	0	16	0.85837		1800000	1	56	0.487563		23400000	0	43	0.85149		23400000	0	1014	0.413216		2500000	1	4006	0.460682
23500000	0	22	0.706531		1900000	1	1538	0.608552		23500000	0	16	0.538427		23500000	0	1066	0.427719		2600000	1	4306	0.547063
0	1	257	0.826496		2000000	1	2232	0.532588		23600000	0	103	0.623099		23600000	0	405	0.497953		2700000	1	6731	0.437898
100000	1	971	0.589131		2100000	1	1513	0.500961		23700000	0	0			23700000	0	626	0.442897		2800000	1	6474	0.385807
200000	1	1983	0.447676		2200000	1	1472	0.419028		23800000	0	24	0.826195		23800000	0	725	0.468358		2900000	1	7060	0.336958
300000	1	1198	0.802343		2300000	1	871	0.3992		23900000	0	3	1		23900000	0	908	0.412269		3000000	1	5121	0.393842
400000	1	2747	0.429899		2400000	1	6670	0.366264		24000000	0	11	0.493885		24000000	0	678	0.415719		3100000	1	2135	0.478152
500000	1	4507	0.386979		2500000	1	10912	0.368425		24100000	0	87	0.930435		24100000	0	950	0.469534		3200000	1	5193	0.389287
600000	1	5349	0.400509		2600000	1	6936	0.395555		24200000	0	7	0.748572		24200000	0	785	0.473607		3300000	1	2064	0.45578
700000	1	5107	0.436669		2700000	1	10392	0.470172		0	1	191	0.56026		24300000	0	789	0.489425		3400000	1	2704	0.403284
800000	1	7229	0.358332		2800000	1	4293	0.438949		100000	1	278	0.668732		24400000	0	1085	0.432615		3500000	1	2621	0.392081
900000	1	9292	0.273434		2900000	1	7122	0.405524		200000	1	1566	0.413495		24500000	0	1346	0.400593		3600000	1	1757	0.46688
1000000	1	8000	0.304821		3000000	1	7011	0.511728		300000	1	4790	0.360168		24600000	0	1398	0.381451		3700000	1	1418	0.409636
1100000	1	8128	0.313125		3100000	1	4198	0.468993		400000	1	7866	0.286032		24700000	0	1389	0.438553		3800000	1	1671	0.427381
1200000	1	7750	0.349754		3200000	1	3665	0.36552		500000	1	3063	0.357174		24800000	0	1265	0.452958		3900000	1	2608	0.425227
1300000	1	8028	0.275292		3300000	1	5338	0.412326		600000	1	6121	0.262107		24900000	0	1162	0.511978		4000000	1	3802	0.401807
1400000	1	6464	0.398227		3400000	1	1858	0.592999		700000	1	8034	0.308565		25000000	0	848	0.453965		4100000	1	3594	0.541597
1500000	1	10915	0.269708		3500000	1	3973	0.464255		800000	1	6727	0.346887		25100000	0	1087	0.43435		4200000	1	3711	0.439989
1600000	1	6300	0.258018		3600000	1	5128	0.443388		900000	1	8107	0.270236		25200000	0	886	0.455542		4300000	1	3542	0.523847
1700000	1	4423	0.338157		3700000	1	9842	0.335791		1000000	1	7694	0.291184		25300000	0	862	0.532108		4400000	1	5941	0.404691
1800000	1	6701	0.359838		3800000	1	10050	0.343674		1100000	1	7179	0.352767		25400000	0	1487	0.468505		4500000	1	6376	0.433056
1900000	1	3826	0.410151		3900000	1	6625	0.340195		1200000	1	5593	0.390242		25500000	0	1008	0.468773		4600000	1	4966	0.409672
2000000	1	3805	0.369223		4000000	1	7224	0.339533		1300000	1	8124	0.337485		25600000	0	1109	0.536528		4700000	1	2741	0.473122
2100000	1	6438	0.367253		4100000	1	9659	0.34701		1400000	1	7565	0.296117		25700000	0	1685	0.494991		4800000	1	5693	0.361163
2200000	1	10412	0.291057		4200000	1	5170	0.371251		1500000	1	5633	0.285367		25800000	0	1193	0.417741		4900000	1	3946	0.374823
2300000	1	5365	0.406353		4300000	1	11083	0.332837		1600000	1	5874	0.256338		25900000	0	1384	0.451679		5000000	1	5339	0.400067
2400000	1	6640	0.323514		4400000	1	10208	0.315206		1700000	1	6643	0.296772		26000000	0	1248	0.458721		5100000	1	7817	0.324506
2500000	1	6337	0.340339		4500000	1	7527	0.400342		1800000	1	6490	0.321877		26100000	0	987	0.440111		5200000	1	7258	0.342155
2600000	1	6655	0.295917		4600000	1	6405	0.428429		1900000	1	5298	0.399396		26200000	0	950	0.468061		5300000	1	4842	0.35422
2700000	1	7807	0.316809		4700000	1	10941	0.348773		2000000	1	6857	0.403078		26300000	0	687	0.538739		5400000	1	6206	0.402439
2800000	1	3878	0.485024		4800000	1	8446	0.359406		2100000	1	6526	0.382173		26400000	0	1002	0.423919		5500000	1	5057	0.566871
2900000	1	6134	0.35462		4900000	1	8586	0.457052		2200000	1	6867	0.34089		26500000	0	771	0.48097		5600000	1	3166	0.547813
3000000	1	7182	0.358548		5000000	1	8084	0.418538		2300000	1	5138	0.433768		26600000	0	318	0.532128		5700000	1	2727	0.826726
3100000	1	6327	0.454519		5100000	1	6850	0.43989		2400000	1	5924	0.439424		26700000	0	903	0.501107		5800000	1	3610	0.674035
3200000	1	8707	0.34877		5200000	1	9703	0.371821		2500000	1	4842	0.366041		26800000	0	458	0.516454		5900000	1	1389	0.90587
3300000	1	10101	0.278164		5300000	1	8977	0.355292		2600000	1	5167	0.342164		26900000	0	209	0.636507		6000000	1	2882	0.712346
3400000	1	7811	0.332696		5400000	1	4257	0.465602		2700000	1	6005	0.387918		27000000	0	70	0.801085		6100000	1	2359	0.56092
3500000	1	9752	0.347773		5500000	1	5344	0.341928		2800000	1	4650	0.410967		27100000	0	30	0.933281		6200000	1	2453	0.479336
3600000	1	5037	0.48076		5600000	1	5190	0.427557		2900000	1	5563	0.366278		0	1	2222	0.385655		6300000	1	2273	0.510014
3700000	1	10865	0.373078		5700000	1	7673	0.330579		3000000	1	713	0.56941		100000	1	1730	0.360999		6400000	1	5017	0.346757
3800000	1	7961	0.460435		5800000	1	5748	0.382702		3100000	1	4958	0.361652		200000	1	3722	0.297656		6500000	1	3437	0.562456
3900000	1	6260	0.45089		5900000	1	7962	0.340077		3200000	1	4943	0.381753		300000	1	5219	0.369204		6600000	1	4934	0.417731
4000000	1	9321	0.364415		6000000	1	7226	0.379634		3300000	1	6222	0.338847		400000	1	3594	0.336873		6700000	1	5748	0.370381
4100000	1	5798	0.398123		6100000	1	8048	0.323175		3400000	1	10217	0.247516		500000	1	4084	0.351733		6800000	1	3406	0.645829
4200000	1	5481	0.423556		6200000	1	6271	0.360012		3500000	1	7095	0.29245		600000	1	3597	0.322272		6900000	1	2758	0.505082
4300000	1	5157	0.328954		6300000	1	7956	0.337566		3600000	1	9487	0.306168		700000	1	4092	0.257925		7000000	1	2437	0.503492
4400000	1	4412	0.46619		6400000	1	6027	0.407867		3700000	1	7405	0.412234		800000	1	6191	0.250247		7100000	1	1402	0.508667
4500000	1	7013	0.417135		6500000	1	2251	0.63712		3800000	1	6947	0.379069		900000	1	5125	0.299528		7200000	1	3119	0.624387
4600000	1	6513	0.43874		6600000	1	2962	0.489092		3900000	1	3961	0.344704		1000000	1	5059	0.297258		7300000	1	2891	0.428424
4700000	1	5667	0.399073		6700000	1	4242	0.373097		4000000	1	5843	0.328172		1100000	1	6622	0.265606		7400000	1	2870	0.533258
4800000	1	5871	0.316195		6800000	1	8716	0.422159		4100000	1	8758	0.394983		1200000	1	5111	0.286052		7500000	1	3423	0.426646
4900000	1	7630	0.325522		6900000	1	10691	0.36137		4200000	1	6985	0.368624		1300000	1	3046	0.260469		7600000	1	4865	0.423106
5000000	1	5975	0.435052		7000000	1	11818	0.362256		4300000	1	9146	0.397804		1400000	1	6364	0.294551		7700000	1	4524	0.494607
5100000	1	10260	0.308606		7100000	1	7173	0.315979		4400000	1	7934	0.350443		1500000	1	4631	0.336912		7800000	1	4127	0.643776
5200000	1	10362	0.303266		7200000	1	11845	0.323148		4500000	1	10356	0.323626		1600000	1	3826	0.374288		7900000	1	5580	0.466309
5300000	1	10989	0.295044		7300000	1	3594	0.464646		4600000	1	8469	0.384704		1700000	1	3479	0.444938		8000000	1	4197	0.508844
5400000	1	6338	0.504775		7400000	1	5248	0.346701		4700000	1	5507	0.449008		1800000	1	2300	0.519821		8100000	1	4734	0.691426
5500000	1	10244	0.364215		7500000	1	8246	0.363967		4800000	1	3332	0.50903		1900000	1	1903	0.453801		8200000	1	5800	0.532844
5600000	1	9485	0.380413		7600000	1	4360	0.362216		4900000	1	7190	0.308187		2000000	1	4225	0.416273		8300000	1	8479	0.418614
5700000	1	4549	0.541889		7700000	1	8279	0.483083		5000000	1	5836	0.366195		2100000	1	6680	0.311099		8400000	1	5595	0.559428
5800000	1	8734	0.413711		7800000	1	9942	0.367071		5100000	1	6197	0.378699		2200000	1	3155	0.433877		8500000	1	4902	0.479508
5900000	1	7244	0.36351		7900000	1	9203	0.354262		5200000	1	6902	0.470941		2300000	1	2890	0.443087		8600000	1	1559	0.727678
6000000	1	9454	0.32248		8000000	1	9049	0.364081		5300000	1	6044	0.44642		2400000	1	3729	0.447832		8700000	1	1032	0.807706
6100000	1	8432	0.417083		8100000	1	9520	0.328317		5400000	1	4399	0.468014		2500000	1	2357	0.472428		8800000	1	3769	0.485234
6200000	1	5476	0.435188		8200000	1	8838	0.374469		5500000	1	4235	0.42542		2600000	1	2623	0.41462		8900000	1	3373	0.520694
6300000	1	7820	0.391201		8300000	1	4068	0.578867		5600000	1	2406	0.558921		2700000	1	8900	0.322603		9000000	1	336	0.975812
6400000	1	4913	0.417402		8400000	1	3727	0.541163		5700000	1	6619	0.354251		2800000	1	5997	0.380765		9100000	1	427	0.716135
6500000	1	6012	0.436554		8500000	1	3486	0.5812		5800000	1	6462	0.361374		2900000	1	6052	0.330282		9200000	1	1922	0.59072
6600000	1	6537	0.357213		8600000	1	5547	0.444902		5900000	1	6858	0.350941		3000000	1	5955	0.393654		9300000	1	2789	0.369324
6700000	1	6343	0.365364		8700000	1	804	0.772035		6000000	1	3302	0.475376		3100000	1	7904	0.351048		9400000	1	1703	0.542521
6800000	1	10867	0.321191		8800000	1	4411	0.69822		6100000	1	7417	0.371258		3200000	1	9230	0.331541		9500000	1	3333	0.380127
6900000	1	11359	0.311197		8900000	1	5522	0.420193		6200000	1	4284	0.402851		3300000	1	4946	0.469973		9600000	1	424	0.695736
7000000	1	8050	0.355103		9000000	1	3641	0.538078		6300000	1	8874	0.32565		3400000	1	3697	0.466878		9700000	1	849	0.646406
7100000	1	10106	0.367975		9100000	1	6573	0.418118		6400000	1	7096	0.380338		3500000	1	6274	0.315852		9800000	1	2039	0.4188
7200000	1	8277	0.33439		9200000	1	8443	0.419533		6500000	1	5198	0.399633		3600000	1	4876	0.337507		9900000	1	3290	0.452962
7300000	1	12344	0.305069		9300000	1	7591	0.441733		6600000	1	8408	0.331344		3700000	1	5178	0.360063		10000000	1	3567	0.347015
7400000	1	9919	0.359183		9400000	1	7534	0.384231		6700000	1	10937	0.280584		3800000	1	10449	0.287764		10100000	1	3317	0.405195
7500000	1	8718	0.316533		9500000	1	14101	0.322512		6800000	1	11099	0.293533		3900000	1	7037	0.403595		10200000	1	3691	0.390409
7600000	1	8830	0.336067		9600000	1	8724	0.363698		6900000	1	6922	0.256165		4000000	1	8500	0.336346		10300000	1	3677	0.458542
7700000	1	7608	0.371405		9700000	1	3722	0.443053		7000000	1	9237	0.324572		4100000	1	5245	0.422868		10400000	1	2474	0.660086
7800000	1	6326	0.420833		9800000	1	4521	0.479539		7100000	1	7090	0.355361		4200000	1	7545	0.327014		10500000	1	3031	0.683173
7900000	1	8377	0.378869		9900000	1	7461	0.341405		7200000	1	5310	0.372809		4300000	1	12159	0.344136		10600000	1	1617	0.660011
8000000	1	10641	0.298574		10000000	1	9068	0.366723		7300000	1	9170	0.308035		4400000	1	5446	0.395829		10700000	1	4839	0.397708
8100000	1	7319	0.354274		10100000	1	7008	0.380347		7400000	1	10908	0.307885		4500000	1	4716	0.499889		10800000	1	3537	0.329079
8200000	1	10000	0.305299		10200000	1	4359	0.398959		7500000	1	8272	0.26692		4600000	1	4331	0.578271		10900000	1	3227	0.343832
8300000	1	8268	0.363799		10300000	1	6760	0.384518		7600000	1	9043	0.299674		4700000	1	4505	0.434363		11000000	1	2750	0.42389
8400000	1	8910	0.392959		10400000	1	9086	0.355292		7700000	1	8006	0.308223		4800000	1	6367	0.452571		11100000	1	1320	0.406097
8500000	1	6799	0.314679		10500000	1	4391	0.441896		7800000	1	8762	0.267341		4900000	1	4511	0.408889		11200000	1	3509	0.344973
8600000	1	8079	0.345204		10600000	1	6439	0.385894		7900000	1	4378	0.417071		5000000	1	6591	0.388512		11300000	1	5240	0.436713
8700000	1	5776	0.478213		10700000	1	5118	0.412053		8000000	1	3087	0.463503		5100000	1	8466	0.307338		11400000	1	3668	0.547564
8800000	1	8940	0.34352		10800000	1	4412	0.403939		8100000	1	5632	0.356145		5200000	1	7592	0.366848		11500000	1	3101	0.503914
8900000	1	6732	0.394453		10900000	1	8203	0.299175		8200000	1	5694	0.309038		5300000	1	4850	0.427757		11600000	1	5367	0.377299
9000000	1	7940	0.46667		11000000	1	5955	0.332537		8300000	1	7408	0.328282		5400000	1	5520	0.351642		11700000	1	7977	0.358507
9100000	1	8482	0.366069		11100000	1	6129	0.390424		8400000	1	6460	0.316384		5500000	1	6327	0.302391		11800000	1	3943	0.444189
9200000	1	7819	0.36009		11200000	1	6087	0.479561		8500000	1	5519	0.351707		5600000	1	7197	0.386397		11900000	1	2517	0.484991
9300000	1	7628	0.286079		11300000	1	7715	0.397665		8600000	1	5389	0.353519		5700000	1	7685	0.313386		12000000	1	4028	0.479559
9400000	1	6354	0.326584		11400000	1	10696	0.406723		8700000	1	4447	0.335561		5800000	1	9671	0.327897		12100000	1	5792	0.514021
9500000	1	5806	0.305881		11500000	1	8322	0.370739		8800000	1	5498	0.321635		5900000	1	11686	0.350157		12200000	1	4487	0.550242
9600000	1	9092	0.282879		11600000	1	6434	0.434958		8900000	1	4404	0.29804		6000000	1	7838	0.324716		12300000	1	3464	0.539402
9700000	1	9673	0.30131		11700000	1	6833	0.436617		9000000	1	6177	0.331652		6100000	1	7830	0.278998		12400000	1	2708	0.644472
9800000	1	8448	0.314198		11800000	1	2917	0.699748		9100000	1	7298	0.338386		6200000	1	9463	0.346636		12500000	1	5231	0.516872
9900000	1	8068	0.370016		11900000	1	4193	0.444445		9200000	1	6023	0.303955		6300000	1	5953	0.320895		12600000	1	3335	0.669282
10000000	1	9632	0.376022		12000000	1	4157	0.537363		9300000	1	5023	0.443925		6400000	1	6198	0.337479		12700000	1	4914	0.5222
10100000	1	10978	0.356033		12100000	1	7726	0.349553		9400000	1	6914	0.380521		6500000	1	5252	0.438587		12800000	1	3536	0.428121
10200000	1	10727	0.397984		12200000	1	6429	0.380093		9500000	1	8393	0.310845		6600000	1	5890	0.41125		12900000	1	2996	0.635795
10300000	1	10800	0.346452		12300000	1	6889	0.377061		9600000	1	7356	0.309245		6700000	1	9007	0.307231		13000000	1	4042	0.465183
10400000	1	9264	0.332738		12400000	1	5615	0.371899		9700000	1	8175	0.316846		6800000	1	6623	0.414497		13100000	1	6590	0.503527
10500000	1	9637	0.347353		12500000	1	4188	0.378436		9800000	1	8423	0.305555		6900000	1	10449	0.264077		13200000	1	4545	0.55426
10600000	1	7489	0.344584		12600000	1	6806	0.328718		9900000	1	8554	0.322647		7000000	1	6201	0.303736		13300000	1	4337	0.525523
10700000	1	10715	0.402844		12700000	1	7287	0.293933		10000000	1	9389	0.258442		7100000	1	11628	0.333548		13400000	1	3267	0.478051
10800000	1	10904	0.334257		12800000	1	5687	0.39071		10100000	1	10080	0.353202		7200000	1	7628	0.331723		13500000	1	6052	0.50629
10900000	1	11637	0.304675		12900000	1	6131	0.333266		10200000	1	9427	0.357593		7300000	1	7768	0.357965		13600000	1	8551	0.503376
11000000	1	10378	0.321409		13000000	1	7002	0.399166		10300000	1	9085	0.30769		7400000	1	8317	0.304011		13700000	1	6900	0.460725
11100000	1	8135	0.36641		13100000	1	7920	0.380191		10400000	1	9942	0.330888		7500000	1	7434	0.371634		13800000	1	5813	0.462342
11200000	1	6622	0.367731		13200000	1	6366	0.461833		10500000	1	6887	0.385824		7600000	1	9143	0.293407		13900000	1	8564	0.428703
11300000	1	8608	0.316596		13300000	1	10121	0.402054		10600000	1	9654	0.257441		7700000	1	9743	0.325551		14000000	1	5605	0.496269
11400000	1	8360	0.33569		13400000	1	7269	0.483113		10700000	1	8498	0.316102		7800000	1	11986	0.321068		14100000	1	4738	0.600322
11500000	1	7604	0.417135		13500000	1	7982	0.347085		10800000	1	11204	0.299103		7900000	1	11766	0.304789		14200000	1	3358	0.634844
11600000	1	9689	0.339462		13600000	1	7074	0.345583		10900000	1	9573	0.288289		8000000	1	10546	0.344134		14300000	1	1462	0.706152
11700000	1	8005	0.365522		13700000	1	6395	0.456015		11000000	1	11258	0.289223		8100000	1	7073	0.389468		14400000	1	3652	0.636869
11800000	1	11183	0.383488		13800000	1	3209	0.470307		11100000	1	16049	0.304504		8200000	1	6770	0.399435		14500000	1	2736	0.492415
11900000	1	9667	0.429581		13900000	1	4413	0.408983		11200000	1	9561	0.365542		8300000	1	7556	0.313249		14600000	1	1426	0.47615
12000000	1	9621	0.356845		14000000	1	6414	0.367684		11300000	1	11757	0.327141		8400000	1	7511	0.345752		14700000	1	2655	0.429627
12100000	1	7550	0.473467		14100000	1	4277	0.44969		11400000	1	9039	0.321085		8500000	1	8380	0.381001		14800000	1	1018	0.407757
12200000	1	14247	0.357597		14200000	1	9074	0.366167		11500000	1	8219	0.267455		8600000	1	4907	0.40256		14900000	1	543	0.362315
12300000	1	7208	0.429447		14300000	1	7976	0.341624		11600000	1	8771	0.369772		8700000	1	4452	0.36678		15000000	1	1737	0.447402
12400000	1	6559	0.506658		14400000	1	7306	0.415438		11700000	1	13956	0.297922		8800000	1	5858	0.269016		15100000	1	6464	0.472346
12500000	1	4075	0.617606		14500000	1	6929	0.410957		11800000	1	10517	0.308493		8900000	1	7081	0.277918		15200000	1	6417	0.42674
12600000	1	7535	0.383518		14600000	1	7927	0.39306		11900000	1	11554	0.318847		9000000	1	7817	0.256656		15300000	1	4271	0.408264
12700000	1	9771	0.383091		14700000	1	7188	0.352065		12000000	1	12684	0.361964		9100000	1	6866	0.260789		15400000	1	2167	0.443685
12800000	1	6074	0.413147		14800000	1	8752	0.344655		12100000	1	11696	0.302579		9200000	1	8596	0.29732		15500000	1	4907	0.365188
12900000	1	7535	0.486054		14900000	1	9409	0.418876		12200000	1	11832	0.284697		9300000	1	6568	0.273612		15600000	1	4475	0.524048
13000000	1	7354	0.393326		15000000	1	8187	0.366484		12300000	1	8311	0.378516		9400000	1	7274	0.238532		15700000	1	5803	0.480102
13100000	1	4949	0.492192		15100000	1	6896	0.327192		12400000	1	7741	0.323161		9500000	1	6849	0.299622		15800000	1	5480	0.461568
13200000	1	8738	0.432061		15200000	1	5667	0.438842		12500000	1	7947	0.341908		9600000	1	7271	0.350987		15900000	1	5877	0.452208
13300000	1	8294	0.383491		15300000	1	5913	0.399852		12600000	1	7426	0.332803		9700000	1	9107	0.341123		16000000	1	4953	0.559529
13400000	1	7780	0.319052		15400000	1	5563	0.364327		12700000	1	7013	0.360638		9800000	1	8847	0.393111		16100000	1	4169	0.504546
13500000	1	7954	0.35792		15500000	1	7023	0.30947		12800000	1	7310	0.416606		9900000	1	5129	0.343364		16200000	1	803	0.658953
13600000	1	7141	0.302957		15600000	1	7446	0.387367		12900000	1	6519	0.373779		10000000	1	5946	0.321771		16300000	1	3879	0.498854
13700000	1	5883	0.303516		15700000	1	7978	0.323771		13000000	1	5528	0.456045		10100000	1	6528	0.338248		16400000	1	4584	0.486459
13800000	1	10421	0.324956		15800000	1	6669	0.31643		13100000	1	5723	0.453723		10200000	1	8333	0.288042		16500000	1	2668	0.607438
13900000	1	10506	0.309603		15900000	1	8318	0.358455		13200000	1	1890	0.43224		10300000	1	6857	0.399386		16600000	1	1891	0.714959
14000000	1	7207	0.372742		16000000	1	3635	0.449701		13300000	1	3760	0.378491		10400000	1	10265	0.287126		16700000	1	6650	0.432127
14100000	1	8755	0.315165		16100000	1	7650	0.323241		13400000	1	5599	0.428216		10500000	1	8509	0.280837		16800000	1	4231	0.481015
14200000	1	9596	0.373961		16200000	1	6539	0.355592		13500000	1	8997	0.318093		10600000	1	9362	0.302354		16900000	1	2476	0.650289
14300000	1	9161	0.38051		16300000	1	3576	0.458678		13600000	1	9311	0.285388		10700000	1	12389	0.289455		17000000	1	3868	0.524194
14400000	1	7271	0.412305		16400000	1	3272	0.481085		13700000	1	7047	0.468673		10800000	1	10603	0.371197		17100000	1	2505	0.448445
14500000	1	11861	0.345436		16500000	1	4053	0.374198		13800000	1	5812	0.425753		10900000	1	5666	0.410969		17200000	1	3814	0.510009
14600000	1	9451	0.366155		16600000	1	4411	0.510807		13900000	1	7085	0.298579		11000000	1	9352	0.326461		17300000	1	3491	0.563755
14700000	1	7340	0.315886		16700000	1	7706	0.365315		14000000	1	6894	0.314072		11100000	1	8640	0.309554		17400000	1	5254	0.451279
14800000	1	2979	0.295443		16800000	1	8261	0.322763		14100000	1	10879	0.295454		11200000	1	8231	0.34134		17500000	1	4615	0.504996
14900000	1	10681	0.293239		16900000	1	5589	0.389839		14200000	1	12554	0.25488		11300000	1	7821	0.364957		17600000	1	3335	0.492339
15000000	1	13191	0.261026		17000000	1	9395	0.314365		14300000	1	8216	0.384909		11400000	1	8322	0.279606		17700000	1	5686	0.485212
15100000	1	9439	0.340184		17100000	1	7379	0.300096		14400000	1	8582	0.340528		11500000	1	11100	0.317599		17800000	1	4097	0.603907
15200000	1	7554	0.408678		17200000	1	7865	0.311424		14500000	1	8034	0.405012		11600000	1	8093	0.30216		17900000	1	4668	0.588324
15300000	1	9160	0.329963		17300000	1	6882	0.348503		14600000	1	9857	0.395807		11700000	1	4288	0.567559		18000000	1	7711	0.416721
15400000	1	8815	0.37898		17400000	1	8638	0.317462		14700000	1	10773	0.299259		11800000	1	3675	0.529421		18100000	1	10827	0.31753
15500000	1	4328	0.336333		17500000	1	9942	0.348674		14800000	1	12579	0.308608		11900000	1	8847	0.429477		18200000	1	4179	0.46207
15600000	1	7269	0.410505		17600000	1	7167	0.340175		14900000	1	10108	0.340271		12000000	1	8109	0.433539		18300000	1	4924	0.568465
15700000	1	7400	0.379171		17700000	1	7322	0.304285		15000000	1	8482	0.375999		12100000	1	6123	0.511187		18400000	1	2066	0.508592
15800000	1	10243	0.324482		17800000	1	6760	0.335433		15100000	1	5896	0.383687		12200000	1	10382	0.378184		18500000	1	4310	0.50741
15900000	1	14292	0.293265		17900000	1	4379	0.404638		15200000	1	8807	0.365554		12300000	1	6427	0.380566		18600000	1	4578	0.546175
16000000	1	8715	0.433394		18000000	1	4325	0.370653		15300000	1	9243	0.279674		12400000	1	7405	0.391813		18700000	1	5829	0.401947
16100000	1	10277	0.388037		18100000	1	8546	0.347971		15400000	1	9812	0.281704		12500000	1	7852	0.522261		18800000	1	3231	0.535093
16200000	1	7620	0.4062		18200000	1	6695	0.366026		15500000	1	10668	0.287572		12600000	1	5819	0.447196		18900000	1	5685	0.442802
16300000	1	7485	0.385908		18300000	1	6083	0.394726		15600000	1	9204	0.289996		12700000	1	6974	0.424251		19000000	1	3345	0.575593
16400000	1	8595	0.445433		18400000	1	6958	0.377148		15700000	1	8947	0.338194		12800000	1	5598	0.432471		19100000	1	3571	0.531743
16500000	1	8655	0.410052		18500000	1	6135	0.354252		15800000	1	9879	0.398033		12900000	1	8073	0.379545		19200000	1	5559	0.513646
16600000	1	10755	0.346975		18600000	1	6135	0.303473		15900000	1	8698	0.384966		13000000	1	6381	0.400495		19300000	1	2574	0.54077
16700000	1	10268	0.379323		18700000	1	4459	0.442142		16000000	1	9301	0.321672		13100000	1	7387	0.436359		19400000	1	1970	0.496633
16800000	1	8307	0.456811		18800000	1	6011	0.373518		16100000	1	7412	0.306567		13200000	1	7712	0.370222		19500000	1	3964	0.360003
16900000	1	8654	0.350493		18900000	1	5686	0.349463		16200000	1	7577	0.355968		13300000	1	6436	0.388287		19600000	1	3671	0.39735
17000000	1	7160	0.385138		19000000	1	4310	0.390287		16300000	1	9729	0.317446		13400000	1	6812	0.32628		19700000	1	1185	0.486393
17100000	1	6588	0.5205		19100000	1	6266	0.332091		16400000	1	8401	0.318748		13500000	1	7012	0.297459		19800000	1	2521	0.542806
17200000	1	4825	0.505004		19200000	1	8035	0.299727		16500000	1	9696	0.277939		13600000	1	5716	0.373454		19900000	1	1433	0.769239
17300000	1	9553	0.354026		19300000	1	4976	0.350358		16600000	1	6858	0.345095		13700000	1	5430	0.354946		20000000	1	2387	0.593086
17400000	1	7717	0.341881		19400000	1	9279	0.387354		16700000	1	7529	0.394896		13800000	1	3829	0.396471		20100000	1	2384	0.484127
17500000	1	7691	0.344084		19500000	1	4441	0.489617		16800000	1	8091	0.337821		13900000	1	6050	0.344359		20200000	1	13	0.611739
17600000	1	5997	0.440769		19600000	1	4008	0.459694		16900000	1	4711	0.375295		14000000	1	3233	0.327755		20300000	1	115	0.721819
17700000	1	6648	0.331001		19700000	1	2712	0.465507		17000000	1	10645	0.358453		14100000	1	7775	0.304978		20400000	1	278	0.567153
17800000	1	5724	0.426179		19800000	1	5218	0.405025		17100000	1	8026	0.29638		14200000	1	5338	0.324717		20500000	1	1048	0.387982
17900000	1	6554	0.413241		19900000	1	4580	0.406263		17200000	1	11442	0.298432		14300000	1	8106	0.309727		20600000	1	1190	0.411804
18000000	1	7289	0.509596		20000000	1	7375	0.311454		17300000	1	2536	0.446739		14400000	1	9761	0.269086		20700000	1	2999	0.49984
18100000	1	4943	0.483016		20100000	1	6032	0.327339		17400000	1	5343	0.311193		14500000	1	7867	0.348198		20800000	1	1355	0.354166
18200000	1	6735	0.433781		20200000	1	7949	0.282629		17500000	1	8031	0.290942		14600000	1	6098	0.329156		0	2	12	0.339068
18300000	1	7723	0.346286		20300000	1	6586	0.263307		17600000	1	12267	0.293224		14700000	1	6486	0.344881		100000	2	0
18400000	1	6704	0.37731		20400000	1	4433	0.318355		17700000	1	10614	0.271631		14800000	1	11159	0.282613		200000	2	339	0.952604
18500000	1	4442	0.453231		20500000	1	6233	0.262992		17800000	1	620	0.323683		14900000	1	7746	0.354911		300000	2	799	0.918428
18600000	1	6405	0.417078		20600000	1	9408	0.22471		17900000	1	12768	0.320861		15000000	1	8701	0.340628		400000	2	765	0.862201
18700000	1	8790	0.281158		20700000	1	5865	0.310653		18000000	1	12791	0.32657		15100000	1	8505	0.284642		500000	2	1971	0.797057
18800000	1	9753	0.346025		20800000	1	5926	0.301517		18100000	1	9723	0.412479		15200000	1	3478	0.327892		600000	2	2567	0.600376
18900000	1	9399	0.370594		20900000	1	6359	0.273951		18200000	1	15529	0.360805		15300000	1	8265	0.277318		700000	2	6804	0.485475
19000000	1	6275	0.416879		21000000	1	6867	0.292672		18300000	1	12040	0.346799		15400000	1	5421	0.28569		800000	2	7153	0.5044
19100000	1	7316	0.364028		21100000	1	3158	0.333078		18400000	1	8479	0.438482		15500000	1	8504	0.268754		900000	2	2674	0.807165
19200000	1	6284	0.403825		21200000	1	1827	0.361373		18500000	1	11836	0.386428		15600000	1	5576	0.268113		1000000	2	5129	0.604055
19300000	1	10709	0.303617		21300000	1	1592	0.329821		18600000	1	8799	0.37297		15700000	1	5922	0.299247		1100000	2	2979	0.581951
19400000	1	8564	0.420911		21400000	1	836	0.427092		18700000	1	5376	0.377336		15800000	1	10361	0.320134		1200000	2	2218	0.534958
19500000	1	10497	0.336453		21500000	1	987	0.478761		18800000	1	9018	0.393589		15900000	1	9692	0.287479		1300000	2	1888	0.741626
19600000	1	1239	0.48724		0	2	233	0.318268		18900000	1	12284	0.354699		16000000	1	9099	0.315515		1400000	2	2300	0.645368
19700000	1	6162	0.376149		100000	2	5545	0.302		19000000	1	7443	0.3854		16100000	1	6496	0.289436		1500000	2	3499	0.64854
19800000	1	7901	0.298106		200000	2	34	0.730646		19100000	1	9319	0.409344		16200000	1	11881	0.31598		1600000	2	4019	0.645175
19900000	1	9515	0.369391		300000	2	4154	0.55225		19200000	1	10333	0.325393		16300000	1	7222	0.382976		1700000	2	6391	0.465765
20000000	1	4954	0.389608		400000	2	0			19300000	1	8533	0.438348		16400000	1	8589	0.356657		1800000	2	1574	0.718016
20100000	1	4467	0.339692		500000	2	263	0.398885		19400000	1	3423	0.498868		16500000	1	7731	0.367743		1900000	2	7962	0.601154
20200000	1	7559	0.314006		600000	2	566	0.331101		19500000	1	8588	0.342321		16600000	1	7230	0.327077		2000000	2	13390	0.356863
20300000	1	6048	0.287954		700000	2	1229	0.328496		19600000	1	8446	0.35307		16700000	1	3942	0.29836		2100000	2	19550	0.375972
20400000	1	4380	0.285456		800000	2	1992	0.236465		19700000	1	7819	0.337606		16800000	1	4187	0.263266		2200000	2	34719	0.302478
20500000	1	1233	0.343177		900000	2	1233	0.350227		19800000	1	6376	0.345369		16900000	1	5299	0.31227		2300000	2	23111	0.3991
20600000	1	363	0.46827		1000000	2	3228	0.71561		19900000	1	9301	0.322264		17000000	1	6513	0.29628		2400000	2	28207	0.321847
20700000	1	198	0.637932		1100000	2	332	0.166176		20000000	1	8352	0.396402		17100000	1	4633	0.264338		2500000	2	24586	0.341668
20800000	1	83	0.638274		1200000	2	123	0.281418		20100000	1	9530	0.330286		17200000	1	8560	0.328364		2600000	2	24860	0.429504
20900000	1	40	0.465472		1300000	2	967	0.466556		20200000	1	8834	0.301986		17300000	1	9165	0.276722		2700000	2	44713	0.296484
21000000	1	219	0.387351		1400000	2	403	0.390567		20300000	1	6314	0.339879		17400000	1	9235	0.351144		2800000	2	46476	0.260529
21100000	1	549	0.393391		1500000	2	9	0.380628		20400000	1	9021	0.293208		17500000	1	6398	0.346274		2900000	2	49226	0.236087
21200000	1	422	0.37706		1600000	2	231	0.367572		20500000	1	8707	0.309802		17600000	1	6743	0.314858		3000000	2	30879	0.266579
21300000	1	453	0.293082		1700000	2	491	0.300409		20600000	1	7963	0.32569		17700000	1	6648	0.345416		3100000	2	14058	0.321553
21400000	1	286	0.388806		1800000	2	438	0.407877		20700000	1	4154	0.36302		17800000	1	2590	0.41844		3200000	2	36143	0.304855
21500000	1	431	0.373946		1900000	2	12588	0.517185		20800000	1	3229	0.364067		17900000	1	7491	0.317815		3300000	2	15568	0.324635
21600000	1	106	0.300268		2000000	2	16395	0.369645		20900000	1	4784	0.40025		18000000	1	7964	0.338324		3400000	2	20684	0.323285
21700000	1	123	0.448868		2100000	2	9984	0.359697		21000000	1	2247	0.425503		18100000	1	7639	0.345585		3500000	2	16637	0.323735
21800000	1	49	0.540787		2200000	2	11250	0.300052		21100000	1	3752	0.386859		18200000	1	5780	0.401126		3600000	2	10608	0.387554
21900000	1	206	0.56203		2300000	2	7674	0.260336		21200000	1	3988	0.353188		18300000	1	6344	0.309611		3700000	2	9871	0.33994
22000000	1	4	0.180048		2400000	2	55442	0.260371		21300000	1	4228	0.416631		18400000	1	7608	0.304679		3800000	2	12432	0.315846
22100000	1	91	0.497044		2500000	2	74022	0.25563		21400000	1	2154	0.432251		18500000	1	7504	0.321391		3900000	2	17422	0.335743
22200000	1	31	0.448207		2600000	2	46702	0.301282		21500000	1	1172	0.614943		18600000	1	7127	0.296856		4000000	2	21907	0.331169
22300000	1	5	0.914857		2700000	2	67445	0.353867		21600000	1	2439	0.390722		18700000	1	6895	0.339752		4100000	2	21877	0.422396
22400000	1	202	0.64487		2800000	2	27658	0.334748		21700000	1	1477	0.411478		18800000	1	4947	0.290981		4200000	2	25323	0.331929
22500000	1	7	0.415268		2900000	2	52675	0.291286		21800000	1	1117	0.317518		18900000	1	6180	0.319644		4300000	2	20825	0.374906
22600000	1	0			3000000	2	49661	0.396307		21900000	1	2901	0.292156		19000000	1	3597	0.323256		4400000	2	36059	0.293892
22700000	1	15	0.512967		3100000	2	30354	0.37358		22000000	1	2694	0.303141		19100000	1	2550	0.442663		4500000	2	38182	0.330594
22800000	1	78	0.480647		3200000	2	24597	0.298078		22100000	1	5959	0.313764		19200000	1	5081	0.377605		4600000	2	31928	0.251315
22900000	1	61	0.336075		3300000	2	34135	0.323219		22200000	1	5992	0.287014		19300000	1	6771	0.304262		4700000	2	19454	0.316833
23000000	1	129	0.922634		3400000	2	11548	0.436266		22300000	1	6505	0.329688		19400000	1	7832	0.295656		4800000	2	38670	0.236897
23100000	1	324	0.545924		3500000	2	25787	0.333528		22400000	1	9812	0.491174		19500000	1	4819	0.349984		4900000	2	26307	0.261685
23200000	1	45	0.672588		3600000	2	34216	0.309022		22500000	1	2830	0.467723		19600000	1	7748	0.335627		5000000	2	34559	0.297822
23300000	1	53	0.500953		3700000	2	70101	0.230136		22600000	1	7	0.358891		19700000	1	6557	0.360704		5100000	2	49907	0.266437
23400000	1	53	0.424755		3800000	2	62775	0.244624		22700000	1	216	0.481187		19800000	1	8559	0.340072		5200000	2	51455	0.252402
23500000	1	87	0.413665		3900000	2	48706	0.230404		22800000	1	1	0.595551		19900000	1	5875	0.334441		5300000	2	34136	0.286718
0	2	1665	0.689496		4000000	2	51125	0.24246		22900000	1	18	0.899584		20000000	1	5151	0.328551		5400000	2	42994	0.321371
100000	2	7281	0.418573		4100000	2	66524	0.257714		23000000	1	516	0.599092		20100000	1	6362	0.365373		5500000	2	32557	0.500583
200000	2	13627	0.330633		4200000	2	34253	0.258854		23100000	1	1324	0.586524		20200000	1	5265	0.36555		5600000	2	20243	0.446126
300000	2	7217	0.668173		4300000	2	86798	0.229494		23200000	1	327	0.520597		20300000	1	4058	0.335387		5700000	2	18767	0.735091
400000	2	18362	0.331732		4400000	2	75576	0.218901		23300000	1	341	0.89348		20400000	1	9151	0.326862		5800000	2	24124	0.546803
500000	2	28886	0.26686		4500000	2	52860	0.290262		23400000	1	250	0.873071		20500000	1	8398	0.349107		5900000	2	7436	0.728423
600000	2	33527	0.291088		4600000	2	43252	0.332958		23500000	1	89	0.482138		20600000	1	7053	0.457774		6000000	2	16704	0.552873
700000	2	34902	0.349041		4700000	2	68126	0.242058		23600000	1	826	0.446622		20700000	1	6650	0.38612		6100000	2	16452	0.413229
800000	2	50606	0.269141		4800000	2	57569	0.274627		23700000	1	0			20800000	1	7484	0.339681		6200000	2	15996	0.373262
900000	2	62697	0.192597		4900000	2	57548	0.365469		23800000	1	81	0.598891		20900000	1	7422	0.363841		6300000	2	15878	0.374026
1000000	2	64036	0.226951		5000000	2	42656	0.31897		23900000	1	19	0.86502		21000000	1	9191	0.349856		6400000	2	34881	0.262897
1100000	2	58965	0.224441		5100000	2	40400	0.345343		24000000	1	61	0.352898		21100000	1	8776	0.346212		6500000	2	23393	0.420605
1200000	2	53312	0.242354		5200000	2	62927	0.264053		24100000	1	560	0.852804		21200000	1	8963	0.307928		6600000	2	27801	0.316594
1300000	2	49649	0.199726		5300000	2	58693	0.240956		24200000	1	23	0.853684		21300000	1	8878	0.287183		6700000	2	35692	0.277139
1400000	2	41300	0.286526		5400000	2	28248	0.313318		0	2	1709	0.4777		21400000	1	8037	0.377972		6800000	2	19489	0.538338
1500000	2	73314	0.200676		5500000	2	30197	0.228921		100000	2	2152	0.494862		21500000	1	5469	0.372237		6900000	2	15483	0.384142
1600000	2	49159	0.192724		5600000	2	32970	0.307082		200000	2	12372	0.321335		21600000	1	5479	0.409333		7000000	2	12133	0.420664
1700000	2	29048	0.209902		5700000	2	53987	0.239998		300000	2	32844	0.282839		21700000	1	6703	0.331875		7100000	2	8043	0.418443
1800000	2	48623	0.231817		5800000	2	42742	0.284298		400000	2	60154	0.221396		21800000	1	5884	0.318721		7200000	2	16674	0.510473
1900000	2	25072	0.291273		5900000	2	52867	0.251652		500000	2	21654	0.24608		21900000	1	6535	0.263665		7300000	2	18923	0.296079
2000000	2	23910	0.271851		6000000	2	49011	0.247416		600000	2	42625	0.181392		22000000	1	7140	0.294768		7400000	2	17303	0.371241
2100000	2	45447	0.243373		6100000	2	48599	0.234028		700000	2	52301	0.212577		22100000	1	4231	0.443099		7500000	2	22885	0.288331
2200000	2	77094	0.197899		6200000	2	43622	0.261456		800000	2	48063	0.251404		22200000	1	5834	0.502177		7600000	2	34733	0.298539
2300000	2	30781	0.273098		6300000	2	51527	0.243665		900000	2	49948	0.196285		22300000	1	8201	0.394636		7700000	2	29573	0.353288
2400000	2	43673	0.21859		6400000	2	39943	0.306279		1000000	2	46083	0.200758		22400000	1	5735	0.419981		7800000	2	26641	0.492413
2500000	2	41888	0.250455		6500000	2	15455	0.511525		1100000	2	52194	0.257521		22500000	1	3341	0.429331		7900000	2	41220	0.349954
2600000	2	46408	0.224372		6600000	2	18289	0.334472		1200000	2	39803	0.278706		22600000	1	5368	0.38163		8000000	2	30789	0.384
2700000	2	59202	0.227479		6700000	2	29534	0.236648		1300000	2	56591	0.247307		22700000	1	4847	0.449512		8100000	2	26452	0.552314
2800000	2	28803	0.378487		6800000	2	50379	0.32206		1400000	2	59055	0.219987		22800000	1	6435	0.340145		8200000	2	31861	0.405497
2900000	2	48335	0.287544		6900000	2	73167	0.278732		1500000	2	43733	0.207834		22900000	1	5982	0.344764		8300000	2	55166	0.31408
3000000	2	48322	0.273806		7000000	2	76374	0.281903		1600000	2	44333	0.199688		23000000	1	4488	0.333375		8400000	2	36936	0.448883
3100000	2	44859	0.374035		7100000	2	52187	0.232143		1700000	2	43832	0.226516		23100000	1	5738	0.303121		8500000	2	31049	0.365643
3200000	2	63511	0.276531		7200000	2	74411	0.235181		1800000	2	48472	0.263696		23200000	1	7149	0.290256		8600000	2	10791	0.615391
3300000	2	74738	0.209398		7300000	2	21362	0.355352		1900000	2	35394	0.333674		23300000	1	5660	0.305656		8700000	2	6652	0.70234
3400000	2	47508	0.235031		7400000	2	37920	0.252913		2000000	2	50825	0.332818		23400000	1	6800	0.281106		8800000	2	20724	0.417358
3500000	2	67382	0.264464		7500000	2	49185	0.254226		2100000	2	47410	0.293959		23500000	1	7031	0.297844		8900000	2	21866	0.450483
3600000	2	34152	0.360727		7600000	2	24835	0.26989		2200000	2	47221	0.262189		23600000	1	2331	0.405634		9000000	2	2978	0.906925
3700000	2	67478	0.280173		7700000	2	51192	0.334328		2300000	2	37191	0.346384		23700000	1	4279	0.304587		9100000	2	3225	0.597252
3800000	2	47320	0.332016		7800000	2	71171	0.298777		2400000	2	38548	0.333001		23800000	1	4593	0.327758		9200000	2	13056	0.523021
3900000	2	38683	0.34827		7900000	2	67758	0.277191		2500000	2	29509	0.24879		23900000	1	5859	0.312049		9300000	2	19059	0.320178
4000000	2	65088	0.283166		8000000	2	60440	0.282464		2600000	2	34064	0.237336		24000000	1	4362	0.288292		9400000	2	12448	0.424189
4100000	2	37128	0.30024		8100000	2	54003	0.213327		2700000	2	32494	0.255923		24100000	1	5715	0.344201		9500000	2	24984	0.283733
4200000	2	37668	0.331252		8200000	2	63078	0.285144		2800000	2	29975	0.313867		24200000	1	5325	0.350585		9600000	2	2721	0.483208
4300000	2	41478	0.26464		8300000	2	22434	0.463452		2900000	2	41425	0.280565		24300000	1	5002	0.323684		9700000	2	6137	0.549988
4400000	2	28219	0.363447		8400000	2	24111	0.45727		3000000	2	4979	0.499835		24400000	1	7349	0.298142		9800000	2	14141	0.318263
4500000	2	47585	0.332359		8500000	2	20397	0.458633		3100000	2	34458	0.276593		24500000	1	8488	0.276226		9900000	2	23991	0.354816
4600000	2	45225	0.310636		8600000	2	35290	0.350576		3200000	2	35770	0.283609		24600000	1	8542	0.253168		10000000	2	26073	0.279448
4700000	2	42540	0.301985		8700000	2	5647	0.744648		3300000	2	39596	0.245497		24700000	1	8222	0.312892		10100000	2	23793	0.295409
4800000	2	41184	0.231867		8800000	2	30319	0.61114		3400000	2	65504	0.179224		24800000	1	8444	0.317138		10200000	2	27612	0.291536
4900000	2	59241	0.241254		8900000	2	44960	0.343296		3500000	2	44230	0.204931		24900000	1	7367	0.333349		10300000	2	24870	0.372379
5000000	2	43242	0.307396		9000000	2	25363	0.438654		3600000	2	67012	0.244211		25000000	1	5614	0.292921		10400000	2	16224	0.560281
5100000	2	72920	0.22478		9100000	2	49512	0.334704		3700000	2	43264	0.320741		25100000	1	7204	0.325722		10500000	2	17350	0.528672
5200000	2	61811	0.211464		9200000	2	59650	0.331626		3800000	2	44115	0.287287		25200000	1	5596	0.333284		10600000	2	10632	0.522802
5300000	2	80487	0.212192		9300000	2	51644	0.33164		3900000	2	33032	0.264024		25300000	1	5939	0.38076		10700000	2	32424	0.295837
5400000	2	40188	0.38887		9400000	2	51007	0.271112		4000000	2	39649	0.240722		25400000	1	9251	0.323364		10800000	2	24386	0.263665
5500000	2	77807	0.274443		9500000	2	86208	0.227347		4100000	2	63631	0.319555		25500000	1	6608	0.342186		10900000	2	21820	0.272964
5600000	2	70886	0.294018		9600000	2	58417	0.257956		4200000	2	54581	0.278225		25600000	1	7579	0.360871		11000000	2	18184	0.319243
5700000	2	29711	0.446886		9700000	2	27568	0.335524		4300000	2	60468	0.293336		25700000	1	10815	0.358837		11100000	2	9669	0.316589
5800000	2	66349	0.327653		9800000	2	28052	0.324794		4400000	2	51322	0.261646		25800000	1	7737	0.272843		11200000	2	24357	0.25454
5900000	2	51732	0.261556		9900000	2	54668	0.253664		4500000	2	67542	0.240008		25900000	1	8543	0.308696		11300000	2	34666	0.305225
6000000	2	59354	0.230361		10000000	2	63712	0.248472		4600000	2	54771	0.285571		26000000	1	8206	0.296508		11400000	2	21313	0.406732
6100000	2	55140	0.316522		10100000	2	48167	0.270141		4700000	2	34530	0.341219		26100000	1	6427	0.287874		11500000	2	17138	0.361244
6200000	2	38844	0.34752		10200000	2	30663	0.298933		4800000	2	21116	0.369929		26200000	1	6619	0.315531		11600000	2	30495	0.278249
6300000	2	56125	0.2923		10300000	2	42068	0.292374		4900000	2	40851	0.226398		26300000	1	4460	0.357011		11700000	2	50648	0.261641
6400000	2	32670	0.320725		10400000	2	69227	0.259623		5000000	2	40176	0.259984		26400000	1	5572	0.28434		11800000	2	24385	0.342856
6500000	2	41808	0.327351		10500000	2	29251	0.299654		5100000	2	39312	0.28549		26500000	1	4522	0.319789		11900000	2	17213	0.29148
6600000	2	42411	0.258314		10600000	2	45796	0.286036		5200000	2	42766	0.384918		26600000	1	1930	0.397349		12000000	2	24554	0.354195
6700000	2	48608	0.267967		10700000	2	37308	0.319745		5300000	2	37962	0.350384		26700000	1	5170	0.339357		12100000	2	37240	0.405431
6800000	2	73118	0.239305		10800000	2	27428	0.291529		5400000	2	30422	0.35276		26800000	1	3139	0.341332		12200000	2	26175	0.438765
6900000	2	81439	0.227647		10900000	2	54667	0.217839		5500000	2	27799	0.352178		26900000	1	1272	0.400949		12300000	2	23471	0.395818
7000000	2	47742	0.252152		11000000	2	38134	0.249272		5600000	2	15256	0.434698		27000000	1	404	0.634006		12400000	2	18249	0.482168
7100000	2	65689	0.254207		11100000	2	41587	0.291656		5700000	2	42218	0.273696		27100000	1	122	0.824909		12500000	2	30279	0.39084
7200000	2	59830	0.257626		11200000	2	40012	0.370453		5800000	2	43189	0.288983		0	2	17248	0.234984		12600000	2	20605	0.530022
7300000	2	74820	0.219229		11300000	2	47918	0.313625		5900000	2	44189	0.244747		100000	2	13133	0.230685		12700000	2	31037	0.408933
7400000	2	68707	0.243726		11400000	2	80283	0.314007		6000000	2	20061	0.33868		200000	2	28679	0.191892		12800000	2	22269	0.302328
7500000	2	56975	0.218927		11500000	2	54528	0.291602		6100000	2	49358	0.278758		300000	2	40174	0.236616		12900000	2	18928	0.49746
7600000	2	49032	0.234092		11600000	2	39223	0.345331		6200000	2	23190	0.274755		400000	2	26543	0.247734		13000000	2	23965	0.364464
7700000	2	57666	0.256523		11700000	2	45328	0.352478		6300000	2	57117	0.246944		500000	2	29832	0.234727		13100000	2	39250	0.376096
7800000	2	45404	0.324777		11800000	2	17047	0.565753		6400000	2	51876	0.280015		600000	2	24507	0.215434		13200000	2	29377	0.38213
7900000	2	64171	0.262122		11900000	2	25795	0.361334		6500000	2	32252	0.321081		700000	2	27816	0.175092		13300000	2	29853	0.383117
8000000	2	80459	0.200369		12000000	2	26546	0.477818		6600000	2	52473	0.244722		800000	2	44207	0.156353		13400000	2	17969	0.345501
8100000	2	58580	0.255749		12100000	2	47580	0.258883		6700000	2	61417	0.185554		900000	2	36601	0.201573		13500000	2	33471	0.382593
8200000	2	68311	0.196209		12200000	2	44311	0.268624		6800000	2	79044	0.210737		1000000	2	35005	0.193188		13600000	2	48141	0.403582
8300000	2	51936	0.264559		12300000	2	37773	0.277741		6900000	2	46556	0.179516		1100000	2	44782	0.168331		13700000	2	38564	0.362678
8400000	2	56603	0.28835		12400000	2	38062	0.275614		7000000	2	59881	0.232473		1200000	2	36193	0.189707		13800000	2	36099	0.38806
8500000	2	35864	0.214965		12500000	2	29313	0.301481		7100000	2	53314	0.259369		1300000	2	21571	0.169886		13900000	2	56081	0.353398
8600000	2	60054	0.229773		12600000	2	50861	0.234142		7200000	2	38212	0.262575		1400000	2	42303	0.181962		14000000	2	36924	0.380588
8700000	2	33518	0.35284		12700000	2	59104	0.225468		7300000	2	64657	0.21474		1500000	2	30655	0.201096		14100000	2	28848	0.486901
8800000	2	58454	0.254262		12800000	2	41641	0.297804		7400000	2	69262	0.211639		1600000	2	19918	0.241587		14200000	2	18516	0.480294
8900000	2	45062	0.306906		12900000	2	38221	0.246436		7500000	2	60700	0.195741		1700000	2	21647	0.301863		14300000	2	8589	0.560357
9000000	2	52963	0.356161		13000000	2	42019	0.297608		7600000	2	56372	0.206784		1800000	2	12706	0.314094		14400000	2	21148	0.491412
9100000	2	55932	0.269432		13100000	2	50567	0.293977		7700000	2	55904	0.190258		1900000	2	13162	0.307461		14500000	2	18794	0.36951
9200000	2	52517	0.272199		13200000	2	41418	0.37957		7800000	2	60430	0.19438		2000000	2	28682	0.252435		14600000	2	10413	0.323978
9300000	2	53687	0.209517		13300000	2	68185	0.309424		7900000	2	31064	0.30176		2100000	2	44251	0.20909		14700000	2	17376	0.263023
9400000	2	42605	0.241977		13400000	2	48366	0.374838		8000000	2	20121	0.35371		2200000	2	20426	0.256587		14800000	2	7534	0.280622
9500000	2	35497	0.212342		13500000	2	58746	0.265813		8100000	2	35093	0.280644		2300000	2	16085	0.235408		14900000	2	3664	0.293515
9600000	2	66813	0.206658		13600000	2	51538	0.266869		8200000	2	42996	0.227043		2400000	2	20494	0.225278		15000000	2	11107	0.313902
9700000	2	66451	0.20785		13700000	2	39609	0.332241		8300000	2	51781	0.236754		2500000	2	15636	0.270194		15100000	2	36145	0.332285
9800000	2	64796	0.221871		13800000	2	18024	0.371595		8400000	2	40622	0.220056		2600000	2	15268	0.195313		15200000	2	40028	0.288024
9900000	2	61367	0.278583		13900000	2	27537	0.29558		8500000	2	35274	0.255512		2700000	2	46852	0.162765		15300000	2	31727	0.291802
10000000	2	72412	0.2757		14000000	2	47017	0.273779		8600000	2	33312	0.274944		2800000	2	42238	0.25674		15400000	2	16104	0.30626
10100000	2	85387	0.26661		14100000	2	30284	0.336298		8700000	2	28399	0.233115		2900000	2	41697	0.211805		15500000	2	30512	0.259674
10200000	2	77581	0.310023		14200000	2	67104	0.265567		8800000	2	37007	0.249017		3000000	2	36277	0.221125		15600000	2	28647	0.4011
10300000	2	72349	0.2551		14300000	2	58905	0.239839		8900000	2	23771	0.209869		3100000	2	48943	0.208841		15700000	2	38506	0.31533
10400000	2	63193	0.257821		14400000	2	52160	0.311315		9000000	2	33894	0.222944		3200000	2	63517	0.198619		15800000	2	34699	0.325981
10500000	2	62850	0.253419		14500000	2	42841	0.290146		9100000	2	52582	0.23883		3300000	2	32008	0.325373		15900000	2	34128	0.346516
10600000	2	53483	0.257317		14600000	2	51956	0.29173		9200000	2	45077	0.222719		3400000	2	23825	0.281625		16000000	2	28434	0.442405
10700000	2	73433	0.307834		14700000	2	43592	0.259368		9300000	2	35973	0.334556		3500000	2	42134	0.191264		16100000	2	31121	0.420778
10800000	2	73081	0.25193		14800000	2	55682	0.264054		9400000	2	49250	0.277359		3600000	2	34031	0.21695		16200000	2	5749	0.525366
10900000	2	75780	0.218673		14900000	2	70008	0.320759		9500000	2	51123	0.22802		3700000	2	34779	0.246208		16300000	2	22021	0.387493
11000000	2	63706	0.236747		15000000	2	55824	0.29229		9600000	2	47398	0.217986		3800000	2	63393	0.196932		16400000	2	28455	0.409795
11100000	2	51832	0.285974		15100000	2	44225	0.237364		9700000	2	50144	0.224046		3900000	2	44284	0.290426		16500000	2	16723	0.485073
11200000	2	42786	0.236852		15200000	2	38615	0.340612		9800000	2	49224	0.226018		4000000	2	49705	0.217365		16600000	2	11706	0.56582
11300000	2	52430	0.215446		15300000	2	41732	0.31598		9900000	2	48948	0.221868		4100000	2	31952	0.29847		16700000	2	40938	0.320874
11400000	2	49109	0.227014		15400000	2	34052	0.282614		10000000	2	50598	0.197583		4200000	2	52460	0.256438		16800000	2	25313	0.374673
11500000	2	49579	0.312149		15500000	2	42402	0.221309		10100000	2	55565	0.26388		4300000	2	88945	0.270567		16900000	2	13746	0.507732
11600000	2	66045	0.239902		15600000	2	49484	0.289146		10200000	2	64588	0.25771		4400000	2	39242	0.307698		17000000	2	25243	0.398355
11700000	2	58651	0.262111		15700000	2	52148	0.238127		10300000	2	61566	0.224129		4500000	2	29965	0.397396		17100000	2	17542	0.342801
11800000	2	76757	0.292826		15800000	2	47126	0.230125		10400000	2	60122	0.214483		4600000	2	29632	0.485992		17200000	2	20112	0.381125
11900000	2	60962	0.326557		15900000	2	67636	0.281548		10500000	2	37982	0.277907		4700000	2	29512	0.330281		17300000	2	21462	0.452121
12000000	2	60908	0.273414		16000000	2	25727	0.343043		10600000	2	54891	0.175597		4800000	2	41890	0.3481		17400000	2	32728	0.357397
12100000	2	51209	0.387637		16100000	2	47743	0.223816		10700000	2	51191	0.212805		4900000	2	28182	0.315118		17500000	2	25262	0.405782
12200000	2	86607	0.278285		16200000	2	42443	0.260553		10800000	2	88778	0.211224		5000000	2	37863	0.238195		17600000	2	21190	0.397914
12300000	2	50222	0.337234		16300000	2	20239	0.307046		10900000	2	67234	0.198845		5100000	2	51537	0.210712		17700000	2	34496	0.382884
12400000	2	35075	0.413689		16400000	2	19282	0.296433		11000000	2	66099	0.199962		5200000	2	42823	0.231204		17800000	2	23532	0.481659
12500000	2	24184	0.468089		16500000	2	21967	0.251557		11100000	2	89872	0.211734		5300000	2	28629	0.247907		17900000	2	31114	0.409682
12600000	2	48701	0.287112		16600000	2	23303	0.405109		11200000	2	64649	0.268949		5400000	2	38993	0.25359		18000000	2	51755	0.324526
12700000	2	64086	0.298571		16700000	2	54642	0.288157		11300000	2	88816	0.23057		5500000	2	47988	0.213519		18100000	2	76578	0.231438
12800000	2	47318	0.307114		16800000	2	47325	0.24059		11400000	2	65595	0.221335		5600000	2	45792	0.282357		18200000	2	26757	0.345406
12900000	2	50084	0.376471		16900000	2	33473	0.292128		11500000	2	59791	0.183594		5700000	2	49061	0.226741		18300000	2	32992	0.44831
13000000	2	50386	0.30402		17000000	2	65736	0.228763		11600000	2	61323	0.276754		5800000	2	70902	0.241528		18400000	2	15937	0.379823
13100000	2	32431	0.387251		17100000	2	53233	0.209773		11700000	2	97851	0.214493		5900000	2	78227	0.268595		18500000	2	32546	0.351265
13200000	2	53576	0.329133		17200000	2	57101	0.233013		11800000	2	80867	0.239784		6000000	2	46168	0.211488		18600000	2	31209	0.396088
13300000	2	56885	0.275525		17300000	2	40934	0.251957		11900000	2	74671	0.242144		6100000	2	51377	0.196834		18700000	2	37698	0.282209
13400000	2	60051	0.243282		17400000	2	62158	0.238996		12000000	2	91969	0.286495		6200000	2	64782	0.249584		18800000	2	19180	0.405471
13500000	2	51590	0.243756		17500000	2	80224	0.253227		12100000	2	75246	0.217725		6300000	2	43406	0.229009		18900000	2	35984	0.338868
13600000	2	46345	0.2042		17600000	2	52661	0.251752		12200000	2	76027	0.198697		6400000	2	40661	0.249404		19000000	2	24007	0.441176
13700000	2	41043	0.215906		17700000	2	57232	0.221985		12300000	2	44742	0.279361		6500000	2	34268	0.340755		19100000	2	22793	0.412151
13800000	2	66479	0.236426		17800000	2	44491	0.248559		12400000	2	58166	0.236989		6600000	2	37183	0.313663		19200000	2	30844	0.396605
13900000	2	70553	0.207868		17900000	2	31827	0.309842		12500000	2	58560	0.268681		6700000	2	65122	0.240658		19300000	2	13781	0.397451
14000000	2	39960	0.253771		18000000	2	29242	0.25894		12600000	2	48433	0.213278		6800000	2	39994	0.319078		19400000	2	13839	0.36702
14100000	2	47162	0.200478		18100000	2	61114	0.270837		12700000	2	39591	0.26423		6900000	2	54372	0.179168		19500000	2	23755	0.281554
14200000	2	53849	0.253133		18200000	2	44514	0.283987		12800000	2	41062	0.314327		7000000	2	43469	0.221239		19600000	2	25343	0.283783
14300000	2	57088	0.286221		18300000	2	39191	0.285374		12900000	2	39017	0.272053		7100000	2	79487	0.27134		19700000	2	8116	0.37361
14400000	2	43732	0.306158		18400000	2	48078	0.296492		13000000	2	32903	0.336208		7200000	2	54200	0.240972		19800000	2	15319	0.407671
14500000	2	73275	0.24594		18500000	2	44283	0.278861		13100000	2	38390	0.346867		7300000	2	50726	0.242004		19900000	2	9109	0.629289
14600000	2	61133	0.260773		18600000	2	43637	0.208773		13200000	2	12419	0.336433		7400000	2	56189	0.203797		20000000	2	14679	0.464249
14700000	2	41061	0.22495		18700000	2	30051	0.344386		13300000	2	19051	0.277983		7500000	2	43467	0.269683		20100000	2	14745	0.359528
14800000	2	17017	0.199802		18800000	2	41164	0.280187		13400000	2	30683	0.303547		7600000	2	64609	0.222543		20200000	2	171	0.462071
14900000	2	63726	0.200477		18900000	2	38794	0.26786		13500000	2	63745	0.232333		7700000	2	65533	0.267907		20300000	2	1005	0.692911
15000000	2	66060	0.158155		19000000	2	28474	0.257287		13600000	2	63691	0.217861		7800000	2	75596	0.248673		20400000	2	2001	0.470768
15100000	2	50962	0.227461		19100000	2	41020	0.245394		13700000	2	48400	0.365178		7900000	2	68214	0.218737		20500000	2	7284	0.291551
15200000	2	47122	0.29038		19200000	2	48348	0.226866		13800000	2	37098	0.338166		8000000	2	69726	0.233765		20600000	2	8614	0.344437
15300000	2	58368	0.229028		19300000	2	34793	0.276582		13900000	2	43110	0.197695		8100000	2	34793	0.26968		20700000	2	24382	0.379636
15400000	2	54420	0.213		19400000	2	61278	0.298304		14000000	2	41623	0.197616		8200000	2	39688	0.264913		20800000	2	10661	0.279099
15500000	2	26287	0.228632		19500000	2	31587	0.362644		14100000	2	64980	0.202707		8300000	2	53426	0.231812		0	3	58	0.328939
15600000	2	36957	0.292951		19600000	2	27149	0.308484		14200000	2	74990	0.160305		8400000	2	54779	0.224272		100000	3	5	0.812528
15700000	2	43355	0.273088		19700000	2	20147	0.342968		14300000	2	52005	0.284272		8500000	2	51687	0.234265		200000	3	1886	0.863891
15800000	2	76530	0.260431		19800000	2	39354	0.28103		14400000	2	56892	0.236325		8600000	2	29425	0.230951		300000	3	7210	0.819527
15900000	2	93567	0.207433		19900000	2	34381	0.293289		14500000	2	48284	0.265402		8700000	2	26944	0.242962		400000	3	5917	0.795492
16000000	2	56398	0.313353		20000000	2	51301	0.230206		14600000	2	65651	0.307756		8800000	2	38468	0.195225		500000	3	18023	0.704648
16100000	2	63832	0.301613		20100000	2	43657	0.234187		14700000	2	78610	0.223602		8900000	2	49265	0.192084		600000	3	25999	0.491056
16200000	2	53196	0.324818		20200000	2	56906	0.230641		14800000	2	64048	0.21436		9000000	2	49852	0.177428		700000	3	64781	0.406051
16300000	2	54946	0.298195		20300000	2	49546	0.212247		14900000	2	55324	0.232943		9100000	2	40784	0.190132		800000	3	69110	0.423437
16400000	2	59173	0.328447		20400000	2	33128	0.22759		15000000	2	48016	0.256289		9200000	2	55128	0.208625		900000	3	22730	0.667639
16500000	2	53289	0.306246		20500000	2	44302	0.173324		15100000	2	43965	0.267445		9300000	2	45363	0.195894		1000000	3	45571	0.503736
16600000	2	61206	0.224323		20600000	2	54975	0.152767		15200000	2	60082	0.266993		9400000	2	49936	0.187559		1100000	3	28222	0.512454
16700000	2	63168	0.277761		20700000	2	36741	0.232715		15300000	2	55096	0.188288		9500000	2	47361	0.228016		1200000	3	21766	0.491688
16800000	2	44327	0.313992		20800000	2	44297	0.22338		15400000	2	59181	0.199585		9600000	2	51872	0.258031		1300000	3	18091	0.578475
16900000	2	64531	0.260787		20900000	2	43856	0.193039		15500000	2	73408	0.20273		9700000	2	59443	0.256484		1400000	3	20939	0.503706
17000000	2	50086	0.288412		21000000	2	46282	0.22444		15600000	2	64179	0.217248		9800000	2	59078	0.317941		1500000	3	33318	0.441001
17100000	2	40030	0.374487		21100000	2	22794	0.227779		15700000	2	56740	0.243959		9900000	2	34633	0.246103		1600000	3	32622	0.469034
17200000	2	29821	0.386054		21200000	2	11787	0.254631		15800000	2	64339	0.290246		10000000	2	43321	0.252786		1700000	3	57698	0.354747
17300000	2	58427	0.253312		21300000	2	12587	0.21469		15900000	2	56565	0.299996		10100000	2	49786	0.273195		1800000	3	13250	0.501671
17400000	2	41924	0.243204		21400000	2	5206	0.26966		16000000	2	61874	0.226227		10200000	2	62191	0.210338		1900000	3	77300	0.458566
17500000	2	49336	0.246613		21500000	2	7640	0.382461		16100000	2	50917	0.215054		10300000	2	40420	0.303942		2000000	3	118687	0.213512
17600000	2	32553	0.31563		0	3	1830	0.190265		16200000	2	50221	0.256817		10400000	2	60087	0.206737		2100000	3	201831	0.258556
17700000	2	39151	0.247968		100000	3	38640	0.273345		16300000	2	67580	0.225306		10500000	2	57483	0.204224		2200000	3	335522	0.166383
17800000	2	29688	0.304968		200000	3	343	0.689342		16400000	2	55713	0.23836		10600000	2	58840	0.22779		2300000	3	213938	0.226436
17900000	2	35796	0.317986		300000	3	34476	0.488531		16500000	2	70374	0.194105		10700000	2	96186	0.223127		2400000	3	258753	0.164223
18000000	2	49769	0.428935		400000	3	0			16600000	2	36506	0.239349		10800000	2	70772	0.270185		2500000	3	234973	0.179469
18100000	2	32364	0.365684		500000	3	1457	0.39123		16700000	2	44753	0.294878		10900000	2	30800	0.338313		2600000	3	237743	0.26999
18200000	2	44037	0.327754		600000	3	1542	0.203181		16800000	2	47997	0.22872		11000000	2	65298	0.253958		2700000	3	443936	0.131357
18300000	2	45504	0.273491		700000	3	10156	0.250737		16900000	2	30090	0.253646		11100000	2	54008	0.234881		2800000	3	457453	0.105808
18400000	2	38101	0.284174		800000	3	4483	0.111654		17000000	2	69253	0.277775		11200000	2	59126	0.258946		2900000	3	495135	0.106324
18500000	2	30750	0.348811		900000	3	8185	0.257165		17100000	2	45987	0.212383		11300000	2	55983	0.259436		3000000	3	295477	0.121513
18600000	2	45209	0.304504		1000000	3	13599	0.599904		17200000	2	68262	0.191406		11400000	2	49516	0.191838		3100000	3	149837	0.148848
18700000	2	55203	0.213288		1100000	3	2023	0.179266		17300000	2	17119	0.219277		11500000	2	66283	0.237605		3200000	3	342156	0.160118
18800000	2	63980	0.253204		1200000	3	480	0.134282		17400000	2	35428	0.151366		11600000	2	59244	0.208636		3300000	3	144626	0.188122
18900000	2	68155	0.258902		1300000	3	2386	0.366622		17500000	2	47249	0.202735		11700000	2	20394	0.442173		3400000	3	198776	0.229056
19000000	2	49127	0.308395		1400000	3	2791	0.279366		17600000	2	83191	0.205614		11800000	2	19143	0.397231		3500000	3	163433	0.228804
19100000	2	46521	0.280722		1500000	3	48	0.277876		17700000	2	64942	0.174276		11900000	2	59661	0.339692		3600000	3	101754	0.216778
19200000	2	44477	0.334648		1600000	3	1912	0.32265		17800000	2	3424	0.258476		12000000	2	53688	0.339309		3700000	3	89448	0.236427
19300000	2	71815	0.225144		1700000	3	2831	0.2246		17900000	2	78301	0.201608		12100000	2	36100	0.414945		3800000	3	105847	0.161714
19400000	2	65059	0.335878		1800000	3	3968	0.292258		18000000	2	79872	0.2171		12200000	2	74230	0.288206		3900000	3	164686	0.207077
19500000	2	75812	0.269162		1900000	3	102623	0.36667		18100000	2	64966	0.311508		12300000	2	45872	0.27924		4000000	3	228468	0.219584
19600000	2	8205	0.35612		2000000	3	139900	0.222806		18200000	2	105919	0.289694		12400000	2	44724	0.291302		4100000	3	209848	0.245086
19700000	2	37715	0.286685		2100000	3	64906	0.225205		18300000	2	76842	0.272421		12500000	2	47865	0.428469		4200000	3	244127	0.177173
19800000	2	50853	0.189227		2200000	3	70432	0.212529		18400000	2	62905	0.347126		12600000	2	38113	0.354773		4300000	3	210928	0.198253
19900000	2	54377	0.233374		2300000	3	72692	0.221462		18500000	2	80479	0.289338		12700000	2	46038	0.294458		4400000	3	342269	0.152321
20000000	2	30615	0.22657		2400000	3	488576	0.220894		18600000	2	53972	0.289359		12800000	2	40348	0.306414		4500000	3	372452	0.175727
20100000	2	31815	0.229283		2500000	3	674543	0.190892		18700000	2	33605	0.280089		12900000	2	54911	0.279535		4600000	3	310753	0.110956
20200000	2	53834	0.211852		2600000	3	398145	0.241914		18800000	2	50577	0.301866		13000000	2	43235	0.306076		4700000	3	182473	0.158018
20300000	2	41659	0.17906		2700000	3	630934	0.277068		18900000	2	88705	0.278581		13100000	2	44108	0.324021		4800000	3	366893	0.0966977
20400000	2	26204	0.165293		2800000	3	225256	0.292315		19000000	2	46638	0.267216		13200000	2	58798	0.250638		4900000	3	235346	0.113978
20500000	2	9348	0.197514		2900000	3	496244	0.236522		19100000	2	60243	0.279292		13300000	2	45730	0.264634		5000000	3	346238	0.173068
20600000	2	2564	0.327422		3000000	3	501757	0.287257		19200000	2	70875	0.257321		13400000	2	48017	0.222144		5100000	3	477723	0.169935
20700000	2	1622	0.562452		3100000	3	256474	0.324069		19300000	2	50537	0.323842		13500000	2	52299	0.214881		5200000	3	497982	0.13551
20800000	2	517	0.491339		3200000	3	239128	0.254043		19400000	2	23624	0.398932		13600000	2	40056	0.281336		5300000	3	327110	0.15682
20900000	2	357	0.446254		3300000	3	314711	0.246667		19500000	2	61668	0.240033		13700000	2	36669	0.251837		5400000	3	412776	0.218074
21000000	2	1454	0.210556		3400000	3	96159	0.276517		19600000	2	56842	0.260303		13800000	2	28451	0.301157		5500000	3	309089	0.379701
21100000	2	4219	0.219742		3500000	3	261490	0.222811		19700000	2	54328	0.235037		13900000	2	37476	0.220849		5600000	3	178107	0.301538
21200000	2	3337	0.196003		3600000	3	313250	0.193602		19800000	2	42181	0.255075		14000000	2	20598	0.244027		5700000	3	161616	0.451601
21300000	2	3691	0.160211		3700000	3	689306	0.155161		19900000	2	70401	0.231798		14100000	2	51681	0.19785		5800000	3	218888	0.296821
21400000	2	2231	0.274232		3800000	3	626575	0.175503		20000000	2	57606	0.289519		14200000	2	32948	0.228951		5900000	3	74058	0.363119
21500000	2	3702	0.237252		3900000	3	436743	0.156452		20100000	2	50292	0.214734		14300000	2	51526	0.216226		6000000	3	153485	0.296631
21600000	2	1026	0.283105		4000000	3	476854	0.165339		20200000	2	43736	0.185042		14400000	2	73971	0.195968		6100000	3	153422	0.179263
21700000	2	837	0.321654		4100000	3	625786	0.171447		20300000	2	41354	0.226935		14500000	2	52279	0.248551		6200000	3	150283	0.171571
21800000	2	351	0.46306		4200000	3	323065	0.181074		20400000	2	47605	0.183095		14600000	2	31247	0.219564		6300000	3	153041	0.174949
21900000	2	1399	0.359859		4300000	3	750408	0.148726		20500000	2	58715	0.23068		14700000	2	29352	0.249228		6400000	3	339453	0.136376
22000000	2	28	0.307587		4400000	3	735805	0.137624		20600000	2	48631	0.224666		14800000	2	74898	0.215531		6500000	3	223621	0.209853
22100000	2	794	0.420993		4500000	3	497610	0.183897		20700000	2	23770	0.266277		14900000	2	57109	0.286		6600000	3	253058	0.156161
22200000	2	194	0.267267		4600000	3	411968	0.231151		20800000	2	21027	0.290012		15000000	2	60188	0.24794		6700000	3	339152	0.183143
22300000	2	11	0.656328		4700000	3	667187	0.159217		20900000	2	29034	0.251791		15100000	2	59425	0.200949		6800000	3	188436	0.39803
22400000	2	1674	0.496318		4800000	3	538864	0.185362		21000000	2	14971	0.293124		15200000	2	28445	0.235461		6900000	3	156566	0.254275
22500000	2	37	0.408181		4900000	3	539589	0.255391		21100000	2	25191	0.247417		15300000	2	56744	0.19314		7000000	3	120766	0.309179
22600000	2	0			5000000	3	445078	0.257274		21200000	2	28669	0.252357		15400000	2	43069	0.214633		7100000	3	75661	0.278988
22700000	2	44	0.352249		5100000	3	389940	0.257247		21300000	2	25475	0.263483		15500000	2	61455	0.194291		7200000	3	151409	0.356486
22800000	2	566	0.3769		5200000	3	619031	0.147821		21400000	2	13648	0.235398		15600000	2	40438	0.188886		7300000	3	172064	0.197349
22900000	2	433	0.295187		5300000	3	559503	0.157953		21500000	2	7645	0.342234		15700000	2	40056	0.206082		7400000	3	145727	0.147526
23000000	2	447	0.852055		5400000	3	260952	0.200762		21600000	2	14087	0.23213		15800000	2	72458	0.215366		7500000	3	206359	0.13333
23100000	2	2170	0.433552		5500000	3	294621	0.138161		21700000	2	9446	0.245614		15900000	2	69098	0.206587		7600000	3	338445	0.132587
23200000	2	339	0.594404		5600000	3	315108	0.189463		21800000	2	7704	0.147892		16000000	2	63766	0.236566		7700000	3	279428	0.153558
23300000	2	234	0.375102		5700000	3	504929	0.152852		21900000	2	17184	0.154783		16100000	2	47962	0.22029		7800000	3	227006	0.202287
23400000	2	602	0.35999		5800000	3	419354	0.204471		22000000	2	17694	0.160851		16200000	2	79280	0.225639		7900000	3	404331	0.171002
23500000	2	572	0.453602		5900000	3	524201	0.159228		22100000	2	40709	0.164904		16300000	2	54225	0.290709		8000000	3	279589	0.213961
0	3	14940	0.638383		6000000	3	507423	0.121742		22200000	2	43592	0.17053		16400000	2	62257	0.255228		8100000	3	257860	0.324689
100000	3	65619	0.342818		6100000	3	438122	0.129186		22300000	2	44144	0.223868		16500000	2	51690	0.259945		8200000	3	337807	0.241618
200000	3	121800	0.233304		6200000	3	404057	0.148345		22400000	2	71646	0.382632		16600000	2	48183	0.251411		8300000	3	549783	0.155507
300000	3	67245	0.525797		6300000	3	504069	0.167805		22500000	2	23489	0.326946		16700000	2	23647	0.221419		8400000	3	339913	0.241061
400000	3	178085	0.249953		6400000	3	390378	0.218901		22600000	2	102	0.197472		16800000	2	30893	0.17122		8500000	3	291929	0.188013
500000	3	275834	0.203704		6500000	3	137234	0.330156		22700000	2	1397	0.394652		16900000	2	33717	0.218071		8600000	3	100309	0.346165
600000	3	334220	0.239759		6600000	3	169792	0.188584		22800000	2	10	0.279393		17000000	2	45974	0.215226		8700000	3	61719	0.476342
700000	3	346064	0.278376		6700000	3	280839	0.156355		22900000	2	47	0.718572		17100000	2	31072	0.199244		8800000	3	212783	0.268116
800000	3	479437	0.190595		6800000	3	485859	0.195704		23000000	2	3850	0.477993		17200000	2	58047	0.226412		8900000	3	206630	0.250451
900000	3	616311	0.134781		6900000	3	725234	0.199554		23100000	2	9709	0.407696		17300000	2	59338	0.208451		9000000	3	27333	0.565696
1000000	3	618430	0.150018		7000000	3	723636	0.168237		23200000	2	2259	0.405906		17400000	2	63971	0.275357		9100000	3	25834	0.315867
1100000	3	569352	0.161854		7100000	3	472296	0.139519		23300000	2	2332	0.862835		17500000	2	36488	0.258075		9200000	3	137545	0.378251
1200000	3	541800	0.175962		7200000	3	737018	0.133164		23400000	2	1757	0.808507		17600000	2	39474	0.226479		9300000	3	184845	0.222294
1300000	3	508001	0.153304		7300000	3	204230	0.219903		23500000	2	579	0.411638		17700000	2	46214	0.250752		9400000	3	122182	0.266578
1400000	3	404993	0.217118		7400000	3	366144	0.146062		23600000	2	5506	0.314895		17800000	2	17018	0.312486		9500000	3	234509	0.17618
1500000	3	718853	0.16766		7500000	3	452172	0.15502		23700000	2	9	0.23065		17900000	2	56404	0.231739		9600000	3	25824	0.246421
1600000	3	460726	0.151929		7600000	3	251712	0.17201		23800000	2	669	0.534261		18000000	2	63673	0.244462		9700000	3	57135	0.295895
1700000	3	280036	0.141786		7700000	3	520077	0.173758		23900000	2	81	0.769076		18100000	2	54380	0.252428		9800000	3	145638	0.183122
1800000	3	475442	0.162411		7800000	3	654709	0.208785		24000000	2	490	0.260801		18200000	2	29877	0.305215		9900000	3	227753	0.211634
1900000	3	249531	0.199942		7900000	3	650245	0.17048		24100000	2	4595	0.812251		18300000	2	40866	0.232849		10000000	3	261779	0.156089
2000000	3	236398	0.186556		8000000	3	576867	0.193163		24200000	2	142	0.807538		18400000	2	54086	0.225971		10100000	3	221883	0.15357
2100000	3	448978	0.154951		8100000	3	561482	0.126278		0	3	15405	0.420585		18500000	2	50811	0.219729		10200000	3	260191	0.174012
2200000	3	739693	0.143537		8200000	3	597161	0.165717		100000	3	19199	0.429294		18600000	2	52537	0.195979		10300000	3	237884	0.239103
2300000	3	314777	0.176272		8300000	3	215939	0.313948		200000	3	123138	0.259679		18700000	2	45609	0.25413		10400000	3	154359	0.405483
2400000	3	419853	0.147164		8400000	3	220363	0.283824		300000	3	331432	0.223254		18800000	2	30007	0.190604		10500000	3	170244	0.247123
2500000	3	418277	0.15082		8500000	3	215042	0.283198		400000	3	585339	0.193223		18900000	2	40517	0.234669		10600000	3	104485	0.25682
2600000	3	461889	0.140826		8600000	3	344842	0.2576		500000	3	194826	0.178416		19000000	2	25482	0.231314		10700000	3	317398	0.166025
2700000	3	573541	0.139806		8700000	3	53579	0.52454		600000	3	425646	0.108813		19100000	2	19135	0.344391		10800000	3	217389	0.152627
2800000	3	267879	0.26858		8800000	3	287146	0.415419		700000	3	542657	0.129811		19200000	2	34787	0.266984		10900000	3	213434	0.172244
2900000	3	478434	0.213023		8900000	3	401226	0.21547		800000	3	438157	0.164685		19300000	2	49901	0.229396		11000000	3	176442	0.173525
3000000	3	451986	0.19629		9000000	3	234780	0.290882		900000	3	503238	0.132592		19400000	2	54395	0.221356		11100000	3	80987	0.201759
3100000	3	433713	0.249981		9100000	3	476329	0.215555		1000000	3	449212	0.13045		19500000	2	33648	0.253051		11200000	3	239633	0.136636
3200000	3	637903	0.152638		9200000	3	576412	0.207693		1100000	3	506076	0.176152		19600000	2	62478	0.254356		11300000	3	315408	0.145258
3300000	3	725570	0.139462		9300000	3	500677	0.180401		1200000	3	376437	0.176195		19700000	2	46072	0.277591		11400000	3	196233	0.164573
3400000	3	471418	0.115097		9400000	3	495980	0.139617		1300000	3	561480	0.13321		19800000	2	57665	0.229196		11500000	3	161327	0.172353
3500000	3	639413	0.155668		9500000	3	842258	0.111334		1400000	3	573260	0.127119		19900000	2	48968	0.237639		11600000	3	312566	0.161613
3600000	3	338444	0.174172		9600000	3	485754	0.143834		1500000	3	416464	0.131944		20000000	2	36881	0.24771		11700000	3	491107	0.126846
3700000	3	670952	0.152497		9700000	3	253006	0.203933		1600000	3	417913	0.144716		20100000	2	43948	0.257133		11800000	3	217239	0.172661
3800000	3	494470	0.183012		9800000	3	284135	0.137073		1700000	3	435311	0.158966		20200000	2	35321	0.271997		11900000	3	163220	0.107959
3900000	3	365227	0.216476		9900000	3	533660	0.143806		1800000	3	483302	0.187417		20300000	2	31283	0.261402		12000000	3	247218	0.177437
4000000	3	653357	0.189166		10000000	3	619307	0.132763		1900000	3	331758	0.274125		20400000	2	55478	0.247651		12100000	3	356030	0.230539
4100000	3	357572	0.167805		10100000	3	454488	0.133127		2000000	3	476656	0.252525		20500000	2	54613	0.275762		12200000	3	256348	0.281653
4200000	3	358253	0.228355		10200000	3	303246	0.176646		2100000	3	481431	0.20804		20600000	2	58709	0.34105		12300000	3	230898	0.217636
4300000	3	399223	0.209894		10300000	3	388895	0.164298		2200000	3	476055	0.175758		20700000	2	42954	0.279342		12400000	3	163265	0.250802
4400000	3	280057	0.203376		10400000	3	668544	0.152934		2300000	3	360922	0.238932		20800000	2	53927	0.252563		12500000	3	283790	0.165321
4500000	3	495334	0.228209		10500000	3	237008	0.149974		2400000	3	389918	0.241145		20900000	2	50720	0.275666		12600000	3	177123	0.274027
4600000	3	419225	0.157179		10600000	3	456604	0.15638		2500000	3	282645	0.154348		21000000	2	65074	0.269638		12700000	3	308280	0.226147
4700000	3	402741	0.172388		10700000	3	326740	0.216858		2600000	3	335378	0.178258		21100000	2	60089	0.253001		12800000	3	217610	0.16552
4800000	3	391284	0.124954		10800000	3	244729	0.142776		2700000	3	318760	0.183163		21200000	2	61373	0.216335		12900000	3	156114	0.202015
4900000	3	574410	0.132518		10900000	3	515615	0.120623		2800000	3	303976	0.240216		21300000	2	55017	0.205288		13000000	3	229548	0.181166
5000000	3	412488	0.164848		11000000	3	376234	0.139667		2900000	3	394049	0.196116		21400000	2	54046	0.276703		13100000	3	386110	0.166509
5100000	3	694863	0.12829		11100000	3	396887	0.169465		3000000	3	36420	0.41634		21500000	2	35202	0.258809		13200000	3	275283	0.148686
5200000	3	625772	0.130084		11200000	3	393091	0.198955		3100000	3	356636	0.166698		21600000	2	32803	0.230332		13300000	3	279449	0.159193
5300000	3	798632	0.121425		11300000	3	470522	0.189004		3200000	3	325702	0.192942		21700000	2	46326	0.238156		13400000	3	150116	0.15642
5400000	3	411888	0.220741		11400000	3	797346	0.225834		3300000	3	401610	0.16198		21800000	2	36604	0.243695		13500000	3	337659	0.238498
5500000	3	761769	0.17996		11500000	3	525359	0.185539		3400000	3	660264	0.130423		21900000	2	45756	0.192256		13600000	3	481165	0.264899
5600000	3	662878	0.194691		11600000	3	392682	0.200737		3500000	3	403304	0.164647		22000000	2	42791	0.206568		13700000	3	395269	0.211003
5700000	3	268867	0.285707		11700000	3	420477	0.244278		3600000	3	687223	0.167659		22100000	2	28740	0.326885		13800000	3	370719	0.265687
5800000	3	654610	0.198656		11800000	3	159503	0.313692		3700000	3	444108	0.219451		22200000	2	46711	0.378531		13900000	3	549032	0.237411
5900000	3	485787	0.139471		11900000	3	233449	0.272438		3800000	3	424609	0.18669		22300000	2	62466	0.296123		14000000	3	348003	0.228982
6000000	3	588474	0.126689		12000000	3	259590	0.298201		3900000	3	285147	0.159084		22400000	2	36060	0.307552		14100000	3	246216	0.279635
6100000	3	558039	0.187385		12100000	3	474072	0.141803		4000000	3	391231	0.1407		22500000	2	21640	0.32307		14200000	3	183207	0.27547
6200000	3	376584	0.215477		12200000	3	411965	0.165298		4100000	3	591348	0.209593		22600000	2	36287	0.279433		14300000	3	74957	0.339743
6300000	3	532444	0.166833		12300000	3	386721	0.163347		4200000	3	499262	0.1702		22700000	2	36371	0.333501		14400000	3	175013	0.255009
6400000	3	310096	0.177511		12400000	3	390167	0.161895		4300000	3	603371	0.181151		22800000	2	45692	0.254043		14500000	3	173894	0.209612
6500000	3	421746	0.17769		12500000	3	266079	0.182983		4400000	3	493750	0.167318		22900000	2	43114	0.240635		14600000	3	97973	0.152011
6600000	3	405756	0.145443		12600000	3	497422	0.117916		4500000	3	664016	0.149146		23000000	2	29245	0.261627		14700000	3	149107	0.122613
6700000	3	463389	0.161224		12700000	3	555330	0.124254		4600000	3	514144	0.167599		23100000	2	39543	0.212302		14800000	3	62950	0.15866
6800000	3	724535	0.13612		12800000	3	403163	0.142447		4700000	3	342374	0.241707		23200000	2	38071	0.202015		14900000	3	29931	0.180741
6900000	3	807074	0.129762		12900000	3	351148	0.139498		4800000	3	187699	0.245147		23300000	2	29088	0.188731		15000000	3	99205	0.173259
7000000	3	473377	0.161813		13000000	3	427455	0.153013		4900000	3	408902	0.144471		23400000	2	36934	0.191922		15100000	3	352280	0.154816
7100000	3	676634	0.149872		13100000	3	488079	0.197629		5000000	3	347708	0.13996		23500000	2	41972	0.207973		15200000	3	382043	0.100789
7200000	3	588740	0.160524		13200000	3	402816	0.221807		5100000	3	385208	0.172112		23600000	2	13605	0.282631		15300000	3	298256	0.142983
7300000	3	742869	0.115465		13300000	3	642888	0.193558		5200000	3	437023	0.240571		23700000	2	23856	0.201565		15400000	3	137102	0.13452
7400000	3	694671	0.148066		13400000	3	462485	0.215663		5300000	3	357966	0.257382		23800000	2	31468	0.2184		15500000	3	289879	0.132434
7500000	3	542663	0.103123		13500000	3	570773	0.20188		5400000	3	296813	0.235583		23900000	2	35532	0.217253		15600000	3	260312	0.190165
7600000	3	509617	0.120064		13600000	3	510905	0.183973		5500000	3	255332	0.246655		24000000	2	31150	0.220152		15700000	3	367109	0.122245
7700000	3	508376	0.140956		13700000	3	385702	0.212283		5600000	3	143600	0.258019		24100000	2	33636	0.232983		15800000	3	338515	0.151957
7800000	3	437530	0.175569		13800000	3	159664	0.242935		5700000	3	394657	0.193653		24200000	2	36731	0.254651		15900000	3	349252	0.21977
7900000	3	618044	0.142047		13900000	3	266291	0.168402		5800000	3	411302	0.189923		24300000	2	34729	0.201525		16000000	3	273851	0.263697
8000000	3	798583	0.0980703		14000000	3	423913	0.160939		5900000	3	444000	0.17019		24400000	2	50959	0.220005		16100000	3	246978	0.257171
8100000	3	575323	0.128982		14100000	3	280721	0.182064		6000000	3	169741	0.203013		24500000	2	51412	0.180488		16200000	3	44036	0.326419
8200000	3	669769	0.0955292		14200000	3	619395	0.14654		6100000	3	500667	0.172334		24600000	2	53983	0.175758		16300000	3	234280	0.262861
8300000	3	513145	0.160291		14300000	3	531742	0.147495		6200000	3	240652	0.193145		24700000	2	50446	0.217513		16400000	3	287795	0.299509
8400000	3	558686	0.18684		14400000	3	502055	0.170628		6300000	3	571321	0.172347		24800000	2	54777	0.219187		16500000	3	161668	0.289499
8500000	3	366659	0.129571		14500000	3	424376	0.17615		6400000	3	479966	0.196018		24900000	2	55346	0.21518		16600000	3	112005	0.35045
8600000	3	580746	0.111055		14600000	3	522529	0.153253		6500000	3	332190	0.215515		25000000	2	41075	0.208372		16700000	3	390396	0.200823
8700000	3	337668	0.205455		14700000	3	436225	0.153965		6600000	3	508190	0.162871		25100000	2	51998	0.230642		16800000	3	242412	0.228028
8800000	3	593681	0.147687		14800000	3	527245	0.148421		6700000	3	624761	0.1279		25200000	2	37683	0.224562		16900000	3	125804	0.267546
8900000	3	420670	0.201466		14900000	3	641470	0.175622		6800000	3	758836	0.138459		25300000	2	41922	0.280627		17000000	3	242368	0.241301
9000000	3	526237	0.214115		15000000	3	543771	0.190754		6900000	3	459792	0.113825		25400000	2	64503	0.250226		17100000	3	166759	0.188248
9100000	3	549168	0.135615		15100000	3	434080	0.140096		7000000	3	573849	0.138448		25500000	2	48403	0.279829		17200000	3	184182	0.217061
9200000	3	530528	0.150088		15200000	3	372851	0.18791		7100000	3	500306	0.145075		25600000	2	53592	0.250144		17300000	3	196064	0.202286
9300000	3	479602	0.108955		15300000	3	386958	0.199422		7200000	3	363482	0.15804		25700000	2	77523	0.279212		17400000	3	322273	0.205286
9400000	3	396271	0.129444		15400000	3	334707	0.192665		7300000	3	616340	0.130239		25800000	2	48699	0.194061		17500000	3	224311	0.236804
9500000	3	331555	0.111063		15500000	3	416323	0.144198		7400000	3	683751	0.116803		25900000	2	56066	0.225668		17600000	3	188768	0.268901
9600000	3	663127	0.120092		15600000	3	487081	0.146271		7500000	3	586640	0.121622		26000000	2	56525	0.20072		17700000	3	338266	0.241229
9700000	3	633176	0.107727		15700000	3	500471	0.143345		7600000	3	555623	0.108831		26100000	2	41137	0.192192		17800000	3	239489	0.310585
9800000	3	622895	0.106443		15800000	3	474162	0.142544		7700000	3	546962	0.0922348		26200000	2	42595	0.228736		17900000	3	270784	0.20761
9900000	3	555594	0.1374		15900000	3	630211	0.193098		7800000	3	575078	0.106814		26300000	2	33224	0.2684		18000000	3	498591	0.156968
10000000	3	677956	0.168568		16000000	3	251295	0.231322		7900000	3	266091	0.204183		26400000	2	34749	0.210258		18100000	3	733830	0.121626
10100000	3	795593	0.16905		16100000	3	482056	0.167037		8000000	3	194574	0.182954		26500000	2	33039	0.231213		18200000	3	245111	0.156503
10200000	3	754238	0.173389		16200000	3	409639	0.175413		8100000	3	352693	0.159931		26600000	2	10966	0.286081		18300000	3	308042	0.191052
10300000	3	707892	0.173382		16300000	3	202971	0.236184		8200000	3	398956	0.139231		26700000	2	35903	0.238364		18400000	3	136265	0.186843
10400000	3	613363	0.150855		16400000	3	181707	0.214749		8300000	3	513370	0.154163		26800000	2	20691	0.250173		18500000	3	288657	0.151253
10500000	3	629434	0.14288		16500000	3	225042	0.156898		8400000	3	394836	0.125258		26900000	2	9355	0.253952		18600000	3	260214	0.163492
10600000	3	525227	0.135949		16600000	3	255887	0.218469		8500000	3	340064	0.172503		27000000	2	2366	0.45161		18700000	3	367842	0.150913
10700000	3	728291	0.187327		16700000	3	509790	0.180831		8600000	3	337219	0.193662		27100000	2	900	0.700789		18800000	3	184483	0.187327
10800000	3	680556	0.138145		16800000	3	460799	0.146233		8700000	3	287076	0.145546		0	3	154973	0.189221		18900000	3	330554	0.210713
10900000	3	779615	0.15091		16900000	3	333170	0.152987		8800000	3	343735	0.146316		100000	3	115316	0.187918		19000000	3	216900	0.27178
11000000	3	625177	0.159169		17000000	3	636963	0.12369		8900000	3	228872	0.117544		200000	3	269269	0.151191		19100000	3	212653	0.260742
11100000	3	502251	0.198611		17100000	3	517027	0.101609		9000000	3	334079	0.113968		300000	3	379802	0.184776		19200000	3	309452	0.219894
11200000	3	423968	0.124767		17200000	3	544089	0.130119		9100000	3	482242	0.128667		400000	3	252522	0.210958		19300000	3	127727	0.284588
11300000	3	524015	0.165808		17300000	3	401224	0.123432		9200000	3	413171	0.136096		500000	3	281171	0.190243		19400000	3	133856	0.254418
11400000	3	486195	0.155638		17400000	3	596109	0.155976		9300000	3	347303	0.175102		600000	3	216858	0.16588		19500000	3	243816	0.177636
11500000	3	533330	0.205696		17500000	3	784649	0.139689		9400000	3	460309	0.141475		700000	3	277984	0.144704		19600000	3	222454	0.148543
11600000	3	609313	0.156254		17600000	3	510723	0.130661		9500000	3	516861	0.110982		800000	3	435807	0.134224		19700000	3	63577	0.205466
11700000	3	582534	0.147861		17700000	3	555878	0.131981		9600000	3	475411	0.119881		900000	3	350328	0.167623		19800000	3	141323	0.225922
11800000	3	748841	0.160519		17800000	3	416235	0.13201		9700000	3	507876	0.136666		1000000	3	339404	0.135938		19900000	3	76025	0.417316
11900000	3	583918	0.211836		17900000	3	298242	0.177966		9800000	3	471596	0.133825		1100000	3	433379	0.124007		20000000	3	150732	0.282256
12000000	3	628339	0.178224		18000000	3	293963	0.147619		9900000	3	498987	0.133396		1200000	3	349663	0.132103		20100000	3	136396	0.243498
12100000	3	508348	0.231281		18100000	3	624386	0.15471		10000000	3	526469	0.131887		1300000	3	213839	0.113276		20200000	3	374	0.411599
12200000	3	843047	0.203774		18200000	3	432225	0.175983		10100000	3	557911	0.172566		1400000	3	406157	0.134061		20300000	3	6558	0.622244
12300000	3	492915	0.213428		18300000	3	400298	0.199206		10200000	3	618671	0.136965		1500000	3	290751	0.144791		20400000	3	16460	0.32893
12400000	3	362046	0.286955		18400000	3	457280	0.213643		10300000	3	598869	0.135363		1600000	3	182055	0.206593		20500000	3	71381	0.211775
12500000	3	244164	0.262688		18500000	3	448462	0.183765		10400000	3	606968	0.108168		1700000	3	212164	0.230266		20600000	3	85339	0.23989
12600000	3	497539	0.170042		18600000	3	406187	0.145562		10500000	3	377886	0.173397		1800000	3	124177	0.254238		20700000	3	210548	0.24907
12700000	3	600603	0.152122		18700000	3	294084	0.227485		10600000	3	559309	0.101354		1900000	3	120106	0.246394		20800000	3	71271	0.221531
12800000	3	470010	0.180535		18800000	3	390569	0.201983		10700000	3	542540	0.105476		2000000	3	281451	0.186319		0	4	94	0.20155
12900000	3	470031	0.216109		18900000	3	368519	0.190601		10800000	3	827032	0.0955748		2100000	3	441964	0.154909		100000	4	394	0.659681
13000000	3	493832	0.212245		19000000	3	266781	0.152128		10900000	3	655028	0.0966939		2200000	3	197070	0.215347		200000	4	9520	0.62814
13100000	3	319355	0.2513		19100000	3	413766	0.174763		11000000	3	675683	0.0997843		2300000	3	155596	0.182537		300000	4	56830	0.578896
13200000	3	537126	0.20139		19200000	3	472587	0.159184		11100000	3	894960	0.101555		2400000	3	194918	0.17579		400000	4	75239	0.463967
13300000	3	525298	0.148187		19300000	3	337785	0.18239		11200000	3	628137	0.154243		2500000	3	147878	0.193509		500000	4	171623	0.440338
13400000	3	571589	0.157351		19400000	3	589292	0.198461		11300000	3	846518	0.113307		2600000	3	151105	0.130399		600000	4	317724	0.223057
13500000	3	499040	0.123373		19500000	3	312244	0.239575		11400000	3	627883	0.128003		2700000	3	479567	0.113913		700000	4	680099	0.201439
13600000	3	425879	0.113533		19600000	3	269163	0.193833		11500000	3	600874	0.109115		2800000	3	402258	0.17457		800000	4	480054	0.228889
13700000	3	406204	0.145344		19700000	3	201098	0.207534		11600000	3	573488	0.191503		2900000	3	408432	0.151348		900000	4	192586	0.257161
13800000	3	694400	0.131744		19800000	3	393998	0.142559		11700000	3	964449	0.13076		3000000	3	351797	0.163335		1000000	4	377710	0.262674
13900000	3	659168	0.106381		19900000	3	328168	0.169526		11800000	3	747145	0.161621		3100000	3	481382	0.157836		1100000	4	272881	0.269277
14000000	3	385549	0.141925		20000000	3	490142	0.148714		11900000	3	746069	0.165932		3200000	3	617282	0.132091		1200000	4	185649	0.28573
14100000	3	472505	0.118395		20100000	3	425894	0.142679		12000000	3	898369	0.181177		3300000	3	298931	0.249172		1300000	4	162485	0.197659
14200000	3	533909	0.141297		20200000	3	528612	0.165972		12100000	3	779906	0.140542		3400000	3	217233	0.178552		1400000	4	210556	0.100452
14300000	3	574311	0.205031		20300000	3	476369	0.167412		12200000	3	740702	0.104819		3500000	3	425138	0.13564		1500000	4	279549	0.120045
14400000	3	421884	0.198885		20400000	3	309306	0.135049		12300000	3	426885	0.15907		3600000	3	310686	0.170039		1600000	4	332951	0.131227
14500000	3	723390	0.12989		20500000	3	424825	0.114444		12400000	3	547155	0.142457		3700000	3	349566	0.184494		1700000	4	307936	0.166368
14600000	3	582574	0.118223		20600000	3	548626	0.105728		12500000	3	562813	0.158011		3800000	3	623699	0.13654		1800000	4	94285	0.0949889
14700000	3	390426	0.128417		20700000	3	357549	0.16124		12600000	3	469470	0.114005		3900000	3	434906	0.242858		1900000	4	712353	0.109372
14800000	3	141012	0.109494		20800000	3	428480	0.147026		12700000	3	370813	0.169539		4000000	3	491133	0.170448		2000000	4	1349836	0.0398562
14900000	3	624337	0.109795		20900000	3	431426	0.146201		12800000	3	420753	0.206084		4100000	3	288477	0.220044		2100000	4	2215906	0.0497761
15000000	3	673625	0.110172		21000000	3	470378	0.170605		12900000	3	360894	0.168903		4200000	3	517888	0.206672		2200000	4	2615490	0.0228877
15100000	3	506548	0.161941		21100000	3	215682	0.182717		13000000	3	317474	0.215836		4300000	3	845585	0.218199		2300000	4	2327482	0.02552
15200000	3	470365	0.202142		21200000	3	113814	0.20137		13100000	3	356321	0.22627		4400000	3	353689	0.223887		2400000	4	2564800	0.0212243
15300000	3	588707	0.129125		21300000	3	110879	0.168933		13200000	3	107919	0.235622		4500000	3	303754	0.276793		2500000	4	2273624	0.0294661
15400000	3	511241	0.154042		21400000	3	45076	0.190055		13300000	3	198942	0.211908		4600000	3	259595	0.332952		2600000	4	2551979	0.0338683
15500000	3	264767	0.170743		21500000	3	69383	0.294046		13400000	3	304793	0.236575		4700000	3	279155	0.247334		2700000	4	4655846	0.0198113
15600000	3	392886	0.191037		0	4	10807	0.0757444		13500000	3	631052	0.161141		4800000	3	403642	0.276355		2800000	4	4725374	0.0176715
15700000	3	422900	0.165438		100000	4	32406	0.181656		13600000	3	617394	0.140617		4900000	3	278987	0.216204		2900000	4	4317415	0.0178479
15800000	3	753835	0.153642		200000	4	11468	0.0570902		13700000	3	459537	0.227873		5000000	3	358202	0.151391		3000000	4	2401870	0.0178283
15900000	3	858560	0.146639		300000	4	36945	0.25815		13800000	3	370544	0.248265		5100000	3	507459	0.14647		3100000	4	1893142	0.0257219
16000000	3	550292	0.14277		400000	4	16	0.059777		13900000	3	434486	0.151572		5200000	3	404004	0.156968		3200000	4	2921005	0.0313797
16100000	3	572883	0.171103		500000	4	4058	0.111453		14000000	3	417191	0.150563		5300000	3	286592	0.175439		3300000	4	1213092	0.040093
16200000	3	492595	0.200974		600000	4	5021	0.15269		14100000	3	655670	0.133877		5400000	3	369574	0.1801		3400000	4	1617068	0.0675832
16300000	3	495268	0.186051		700000	4	54353	0.0958649		14200000	3	745244	0.127661		5500000	3	472245	0.135655		3500000	4	1391825	0.0664093
16400000	3	556580	0.224443		800000	4	15582	0.0373802		14300000	3	540152	0.185144		5600000	3	431270	0.208123		3600000	4	818651	0.0709851
16500000	3	537905	0.212936		900000	4	55248	0.0250417		14400000	3	547519	0.145888		5700000	3	491472	0.172345		3700000	4	787496	0.0543555
16600000	3	627160	0.167845		1000000	4	44141	0.2402		14500000	3	493347	0.18122		5800000	3	670983	0.181497		3800000	4	1147887	0.0301075
16700000	3	624152	0.222268		1100000	4	4651	0.0725912		14600000	3	659888	0.211725		5900000	3	772364	0.201555		3900000	4	1653982	0.0418975
16800000	3	451116	0.220829		1200000	4	1015	0.0218725		14700000	3	751526	0.130504		6000000	3	433412	0.149411		4000000	4	2147977	0.0362063
16900000	3	619691	0.157488		1300000	4	12060	0.0367367		14800000	3	678024	0.12891		6100000	3	490721	0.127063		4100000	4	2169987	0.0325013
17000000	3	475752	0.183216		1400000	4	4600	0.149224		14900000	3	545782	0.14913		6200000	3	599931	0.152836		4200000	4	2333084	0.0255129
17100000	3	380642	0.235089		1500000	4	513	0.147953		15000000	3	472495	0.179919		6300000	3	418720	0.124175		4300000	4	2159725	0.030103
17200000	3	279122	0.242995		1600000	4	8346	0.105629		15100000	3	404482	0.138791		6400000	3	386375	0.172052		4400000	4	3398599	0.0231384
17300000	3	583476	0.171496		1700000	4	14260	0.0607485		15200000	3	604039	0.146762		6500000	3	333721	0.191774		4500000	4	3187436	0.0257721
17400000	3	439751	0.180917		1800000	4	104436	0.0568967		15300000	3	556924	0.109375		6600000	3	360354	0.199853		4600000	4	2785115	0.0213913
17500000	3	471455	0.194801		1900000	4	765999	0.126843		15400000	3	583146	0.120359		6700000	3	637781	0.155705		4700000	4	2068240	0.020928
17600000	3	319192	0.185589		2000000	4	488270	0.156659		15500000	3	712785	0.132281		6800000	3	354707	0.173027		4800000	4	3134736	0.0150445
17700000	3	385555	0.187119		2100000	4	541103	0.161305		15600000	3	610757	0.12773		6900000	3	523586	0.106528		4900000	4	2598302	0.0168692
17800000	3	281261	0.223919		2200000	4	340874	0.136965		15700000	3	543783	0.132845		7000000	3	406263	0.1324		5000000	4	3856002	0.0268242
17900000	3	384031	0.257093		2300000	4	554139	0.15934		15800000	3	624105	0.1664		7100000	3	766636	0.169997		5100000	4	5043657	0.0369612
18000000	3	476587	0.316058		2400000	4	3984539	0.159125		15900000	3	545057	0.199076		7200000	3	532826	0.140607		5200000	4	3970405	0.0282607
18100000	3	335569	0.244589		2500000	4	6115585	0.109043		16000000	3	591038	0.112806		7300000	3	497435	0.114935		5300000	4	3277092	0.0242957
18200000	3	444958	0.232954		2600000	4	3921374	0.116031		16100000	3	470913	0.133687		7400000	3	535222	0.113884		5400000	4	3917722	0.0454313
18300000	3	446178	0.207644		2700000	4	4959195	0.141683		16200000	3	493277	0.127596		7500000	3	435120	0.166163		5500000	4	2765526	0.0956936
18400000	3	376557	0.212964		2800000	4	1794754	0.135161		16300000	3	673894	0.128571		7600000	3	647201	0.140272		5600000	4	1737524	0.0554176
18500000	3	289440	0.279945		2900000	4	4674332	0.13547		16400000	3	557006	0.152101		7700000	3	532495	0.21775		5700000	4	1564232	0.0515073
18600000	3	471080	0.158002		3000000	4	4313491	0.180313		16500000	3	677416	0.123827		7800000	3	754497	0.181489		5800000	4	1617005	0.0313895
18700000	3	536065	0.148981		3100000	4	1039655	0.124691		16600000	3	363132	0.126762		7900000	3	686402	0.171613		5900000	4	729774	0.0265683
18800000	3	640968	0.170214		3200000	4	2305237	0.0993207		16700000	3	439911	0.170515		8000000	3	677657	0.170846		6000000	4	1616187	0.0294699
18900000	3	639199	0.144287		3300000	4	2477741	0.110573		16800000	3	465378	0.138492		8100000	3	344996	0.203213		6100000	4	1381556	0.032625
19000000	3	430277	0.174996		3400000	4	1190590	0.0864813		16900000	3	267171	0.151617		8200000	3	397936	0.211493		6200000	4	1339345	0.0290574
19100000	3	448638	0.16771		3500000	4	2857338	0.077416		17000000	3	695540	0.200835		8300000	3	520183	0.163607		6300000	4	1941613	0.0182708
19200000	3	439473	0.246629		3600000	4	3593892	0.0704421		17100000	3	458961	0.134669		8400000	3	512205	0.153095		6400000	4	2776806	0.0263323
19300000	3	700397	0.179797		3700000	4	6716878	0.0512285		17200000	3	657423	0.123084		8500000	3	504372	0.171888		6500000	4	2166214	0.0243271
19400000	3	640538	0.243967		3800000	4	5968196	0.0693236		17300000	3	150738	0.138853		8600000	3	289051	0.187033		6600000	4	2210219	0.0301421
19500000	3	735684	0.201716		3900000	4	4307198	0.0420545		17400000	3	364257	0.110525		8700000	3	286213	0.180344		6700000	4	2927415	0.0504318
19600000	3	65448	0.212828		4000000	4	5297864	0.057148		17500000	3	471709	0.134695		8800000	3	341163	0.143346		6800000	4	1738783	0.121012
19700000	3	363518	0.203575		4100000	4	4579062	0.0559467		17600000	3	810149	0.110995		8900000	3	477502	0.144586		6900000	4	1396264	0.0787603
19800000	3	501374	0.13199		4200000	4	3582655	0.0335641		17700000	3	594627	0.0850211		9000000	3	500513	0.131669		7000000	4	924829	0.101805
19900000	3	533629	0.157684		4300000	4	7553557	0.0414699		17800000	3	37451	0.168158		9100000	3	392596	0.148613		7100000	4	925131	0.0635607
20000000	3	304148	0.169305		4400000	4	6339027	0.0303418		17900000	3	776174	0.14237		9200000	3	514985	0.127112		7200000	4	1362360	0.0889547
20100000	3	306879	0.167095		4500000	4	4811730	0.0415313		18000000	3	806503	0.170643		9300000	3	449563	0.14093		7300000	4	1414429	0.0521906
20200000	3	546320	0.135672		4600000	4	4864847	0.0777302		18100000	3	659413	0.223762		9400000	3	474316	0.133076		7400000	4	1424721	0.0175309
20300000	3	407811	0.140665		4700000	4	5437613	0.0655325		18200000	3	1029650	0.212677		9500000	3	457088	0.162078		7500000	4	2280103	0.020455
20400000	3	254064	0.132128		4800000	4	5137588	0.0643092		18300000	3	714857	0.20095		9600000	3	511841	0.161573		7600000	4	3389820	0.0169172
20500000	3	81455	0.144337		4900000	4	5411707	0.0883758		18400000	3	582242	0.193604		9700000	3	581038	0.166869		7700000	4	2305244	0.0172513
20600000	3	22139	0.240884		5000000	4	3849954	0.126583		18500000	3	799578	0.213173		9800000	3	587331	0.253365		7800000	4	2233629	0.01931
20700000	3	14748	0.471648		5100000	4	4356264	0.0865469		18600000	3	496694	0.181245		9900000	3	319842	0.13617		7900000	4	3413324	0.0231577
20800000	3	3821	0.398862		5200000	4	6261357	0.0436276		18700000	3	321349	0.206723		10000000	3	409827	0.16269		8000000	4	2812039	0.0280633
20900000	3	2967	0.412067		5300000	4	4696280	0.0491404		18800000	3	512946	0.200478		10100000	3	458786	0.16276		8100000	4	2404480	0.0476725
21000000	3	15180	0.173301		5400000	4	2858026	0.0538758		18900000	3	840841	0.199408		10200000	3	598783	0.130011		8200000	4	4066486	0.0353999
21100000	3	39772	0.181463		5500000	4	2550926	0.0567361		19000000	3	454226	0.169821		10300000	3	401525	0.221496		8300000	4	4916958	0.0224234
21200000	3	31099	0.160994		5600000	4	3700633	0.0543902		19100000	3	554332	0.177336		10400000	3	639732	0.14465		8400000	4	3190291	0.0256586
21300000	3	36824	0.14072		5700000	4	4387122	0.0465949		19200000	3	715795	0.169357		10500000	3	541358	0.14094		8500000	4	2112940	0.0285963
21400000	3	18622	0.237432		5800000	4	4472775	0.0474151		19300000	3	472975	0.149174		10600000	3	577096	0.137636		8600000	4	652080	0.0570281
21500000	3	20738	0.17346		5900000	4	4823020	0.0406451		19400000	3	211466	0.235795		10700000	3	899103	0.143818		8700000	4	831599	0.0705429
21600000	3	6068	0.237909		6000000	4	5171973	0.0288583		19500000	3	608059	0.137666		10800000	3	661496	0.169986		8800000	4	2265557	0.0436236
21700000	3	6263	0.260912		6100000	4	3877485	0.0338919		19600000	3	550932	0.19901		10900000	3	291627	0.199822		8900000	4	661954	0.0660605
21800000	3	1948	0.405796		6200000	4	4141364	0.0422987		19700000	3	518069	0.16348		11000000	3	619609	0.174577		9000000	4	113632	0.103044
21900000	3	4141	0.388748		6300000	4	4922452	0.058977		19800000	3	406379	0.181194		11100000	3	552776	0.175705		9100000	4	288466	0.0260939
22000000	3	104	0.367223		6400000	4	3133108	0.0962369		19900000	3	670415	0.157758		11200000	3	570078	0.167961		9200000	4	1491190	0.0611301
22100000	3	5540	0.292987		6500000	4	1021917	0.0770586		20000000	3	567426	0.175834		11300000	3	545099	0.12066		9300000	4	1688432	0.0463126
22200000	3	682	0.241586		6600000	4	1891950	0.041004		20100000	3	518282	0.151028		11400000	3	504170	0.109338		9400000	4	1470813	0.0370508
22300000	3	55	0.284183		6700000	4	3315032	0.0393861		20200000	3	425695	0.127237		11500000	3	653501	0.141172		9500000	4	1456360	0.0407216
22400000	3	9165	0.416072		6800000	4	5506834	0.034301		20300000	3	390818	0.175268		11600000	3	563523	0.101301		9600000	4	312871	0.022136
22500000	3	113	0.0810542		6900000	4	6466331	0.0631132		20400000	3	499669	0.125215		11700000	3	167014	0.27027		9700000	4	602878	0.0284748
22600000	3	0			7000000	4	6901842	0.0363925		20500000	3	568772	0.171016		11800000	3	192984	0.221064		9800000	4	1647118	0.0264663
22700000	3	111	0.120236		7100000	4	4920172	0.0261543		20600000	3	469242	0.172246		11900000	3	601273	0.214198		9900000	4	2121756	0.0358792
22800000	3	4233	0.181276		7200000	4	5437387	0.0298716		20700000	3	236651	0.213773		12000000	3	511050	0.277589		10000000	4	2509883	0.0310431
22900000	3	2256	0.269572		7300000	4	1912547	0.0536367		20800000	3	205084	0.240822		12100000	3	362965	0.331605		10100000	4	1996803	0.0205972
23000000	3	340	0.803796		7400000	4	4089232	0.0305645		20900000	3	271639	0.202567		12200000	3	730966	0.206477		10200000	4	2683691	0.0350449
23100000	3	16339	0.431764		7500000	4	3859575	0.0314317		21000000	3	136676	0.219316		12300000	3	408035	0.160523		10300000	4	2110009	0.0492832
23200000	3	1346	0.179643		7600000	4	2955515	0.0390068		21100000	3	230618	0.178282		12400000	3	432957	0.221296		10400000	4	1509951	0.070452
23300000	3	637	0.167849		7700000	4	5683225	0.0321296		21200000	3	276839	0.206264		12500000	3	471612	0.340969		10500000	4	1258577	0.0364306
23400000	3	5104	0.249627		7800000	4	6189914	0.0697603		21300000	3	243117	0.184523		12600000	3	351834	0.254242		10600000	4	1354729	0.0247584
23500000	3	3223	0.279972		7900000	4	6449831	0.0361501		21400000	3	113010	0.169249		12700000	3	468126	0.146933		10700000	4	2976815	0.0260933
0	4	196355	0.263779		8000000	4	5227439	0.0521658		21500000	3	74201	0.201622		12800000	3	390789	0.157834		10800000	4	2035004	0.0313445
100000	4	680781	0.120942		8100000	4	5838872	0.0354099		21600000	3	141911	0.173099		12900000	3	494089	0.155105		10900000	4	1939161	0.0378978
200000	4	923401	0.108829		8200000	4	4839616	0.044535		21700000	3	85364	0.196318		13000000	3	429258	0.208295		11000000	4	1486739	0.0293084
300000	4	857695	0.158982		8300000	4	2074140	0.0643922		21800000	3	79027	0.120049		13100000	3	421909	0.189918		11100000	4	751770	0.0362195
400000	4	1955668	0.0918314		8400000	4	2130145	0.0831408		21900000	3	171207	0.122143		13200000	3	589956	0.127069		11200000	4	2381096	0.0210247
500000	4	2971906	0.0803546		8500000	4	2374866	0.0838126		22000000	3	171430	0.130165		13300000	3	443675	0.142645		11300000	4	2806993	0.0221744
600000	4	3474406	0.1038		8600000	4	1746589	0.124822		22100000	3	388583	0.134521		13400000	3	473807	0.120115		11400000	4	1680124	0.0258668
700000	4	3510554	0.139743		8700000	4	565745	0.0558718		22200000	3	386737	0.126422		13500000	3	510561	0.127972		11500000	4	1849782	0.0340254
800000	4	5229442	0.0447307		8800000	4	2514272	0.0870708		22300000	3	390236	0.14964		13600000	3	391911	0.153251		11600000	4	3655665	0.029788
900000	4	6008828	0.04139		8900000	4	3374231	0.0537345		22400000	3	680254	0.311012		13700000	3	333305	0.142061		11700000	4	4139082	0.0203025
1000000	4	5765401	0.0426118		9000000	4	2846587	0.0494394		22500000	3	194792	0.254089		13800000	3	284300	0.199248		11800000	4	1924222	0.0272977
1100000	4	5577930	0.0506073		9100000	4	4703707	0.0412465		22600000	3	1017	0.154073		13900000	3	366898	0.149858		11900000	4	1647570	0.0158075
1200000	4	5015049	0.0534917		9200000	4	5613291	0.0418242		22700000	3	4231	0.219586		14000000	3	202469	0.142135		12000000	4	2519490	0.0283731
1300000	4	4993634	0.0749452		9300000	4	4944314	0.029795		22800000	3	40	0.336342		14100000	3	492273	0.132964		12100000	4	3498361	0.0454307
1400000	4	4434678	0.115538		9400000	4	5172193	0.0261594		22900000	3	132	0.341135		14200000	3	334005	0.166691		12200000	4	2378521	0.0530912
1500000	4	6622089	0.0813815		9500000	4	7507170	0.0210464		23000000	3	17300	0.440348		14300000	3	516011	0.115477		12300000	4	1887822	0.0303011
1600000	4	3236657	0.080815		9600000	4	4176689	0.0349715		23100000	3	86356	0.334852		14400000	3	660200	0.116884		12400000	4	1815399	0.0297443
1700000	4	3221273	0.0572		9700000	4	2225718	0.0379917		23200000	3	9092	0.44487		14500000	3	483331	0.147791		12500000	4	2690936	0.0182282
1800000	4	3981373	0.0647777		9800000	4	3184021	0.0231989		23300000	3	12023	0.857197		14600000	3	315900	0.128873		12600000	4	1816660	0.0314638
1900000	4	1862423	0.067873		9900000	4	5713442	0.0282364		23400000	3	6825	0.720156		14700000	3	313714	0.152129		12700000	4	2883173	0.0388615
2000000	4	2679621	0.061783		10000000	4	6098154	0.023498		23500000	3	1624	0.182473		14800000	3	720826	0.148878		12800000	4	2051436	0.0252413
2100000	4	5110090	0.0607299		10100000	4	3620324	0.0257392		23600000	3	28851	0.190924		14900000	3	550012	0.182767		12900000	4	1577784	0.0204922
2200000	4	6050445	0.0662411		10200000	4	3450716	0.0253324		23700000	3	1	0.0311419		15000000	3	596993	0.129695		13000000	4	2777392	0.0218305
2300000	4	3303048	0.0486592		10300000	4	4081589	0.033278		23800000	3	5547	0.44129		15100000	3	591855	0.102839		13100000	4	3472183	0.0238441
2400000	4	4188469	0.0383225		10400000	4	5133174	0.0376622		23900000	3	85	0.0920092		15200000	3	265287	0.131539		13200000	4	2786038	0.0200574
2500000	4	4197158	0.037472		10500000	4	1588125	0.0279935		24000000	3	748	0.238725		15300000	3	555272	0.0941351		13300000	4	2187286	0.0205693
2600000	4	4830610	0.0368705		10600000	4	3938523	0.0243595		24100000	3	30999	0.695928		15400000	3	405331	0.131243		13400000	4	1971966	0.0192363
2700000	4	4423691	0.0338298		10700000	4	2938074	0.0449704		24200000	3	576	0.741241		15500000	3	579286	0.0982399		13500000	4	3466330	0.052375
2800000	4	3161389	0.09252		10800000	4	2594096	0.0247453		0	4	158570	0.318222		15600000	3	388026	0.0922148		13600000	4	4745041	0.0563955
2900000	4	4804697	0.069494		10900000	4	4764403	0.0229278		100000	4	285883	0.231535		15700000	3	364575	0.096789		13700000	4	3930174	0.043871
3000000	4	4282022	0.0653909		11000000	4	3910190	0.0255271		200000	4	1378495	0.100267		15800000	3	724374	0.0977209		13800000	4	3561925	0.0388525
3100000	4	4639722	0.0551934		11100000	4	3813998	0.033631		300000	4	3942876	0.108546		15900000	3	675191	0.111806		13900000	4	5107638	0.0444451
3200000	4	6742084	0.0365502		11200000	4	4236003	0.0320258		400000	4	4536548	0.108004		16000000	3	658738	0.143013		14000000	4	2755848	0.0432205
3300000	4	6172620	0.0404539		11300000	4	5335044	0.0426906		500000	4	2165318	0.0536247		16100000	3	456921	0.138034		14100000	4	2029628	0.051848
3400000	4	5392401	0.0255919		11400000	4	7332121	0.061437		600000	4	4265118	0.0372495		16200000	3	782254	0.115718		14200000	4	1486109	0.0458572
3500000	4	5320944	0.0376069		11500000	4	4688121	0.0386451		700000	4	5246916	0.0473733		16300000	3	514574	0.16428		14300000	4	881573	0.0450858
3600000	4	4181178	0.0228244		11600000	4	4287676	0.0542242		800000	4	4031402	0.04183		16400000	3	608617	0.139642		14400000	4	1503795	0.038773
3700000	4	5715562	0.0393513		11700000	4	2952431	0.0697169		900000	4	4984249	0.0413624		16500000	3	500962	0.155405		14500000	4	1381972	0.0337164
3800000	4	4722911	0.033623		11800000	4	1504134	0.0905889		1000000	4	4480707	0.0379054		16600000	3	472543	0.149314		14600000	4	1093678	0.0258385
3900000	4	4268258	0.0419129		11900000	4	2285558	0.0706082		1100000	4	4632916	0.0648063		16700000	3	239873	0.109489		14700000	4	951391	0.0311543
4000000	4	5234684	0.0388189		12000000	4	3047709	0.0576731		1200000	4	4388708	0.0463302		16800000	3	299912	0.0957356		14800000	4	507161	0.0278555
4100000	4	3573533	0.0447426		12100000	4	4564094	0.0287926		1300000	4	5174956	0.0287256		16900000	3	321635	0.119963		14900000	4	374665	0.0287838
4200000	4	3803514	0.0651196		12200000	4	3773053	0.0385983		1400000	4	5124998	0.0312549		17000000	3	451040	0.129606		15000000	4	1426875	0.0284669
4300000	4	3068263	0.079288		12300000	4	3910782	0.0443749		1500000	4	4386110	0.0432934		17100000	3	312698	0.110117		15100000	4	3568646	0.0202404
4400000	4	3402763	0.0406161		12400000	4	3666669	0.0356328		1600000	4	3568331	0.0599765		17200000	3	573491	0.114675		15200000	4	3576765	0.0221992
4500000	4	4665974	0.0434541		12500000	4	2727629	0.0448155		1700000	4	4310514	0.05265		17300000	3	600313	0.145413		15300000	4	2603669	0.0228809
4600000	4	4183272	0.0270228		12600000	4	5157629	0.0247208		1800000	4	4508958	0.0880474		17400000	3	611917	0.198565		15400000	4	1353299	0.0208456
4700000	4	3581885	0.0302278		12700000	4	5115165	0.0244382		1900000	4	3442676	0.0989418		17500000	3	386470	0.156937		15500000	4	2444226	0.0254889
4800000	4	4831208	0.0229162		12800000	4	3790405	0.0293161		2000000	4	4694406	0.0925125		17600000	3	390111	0.157877		15600000	4	2866701	0.0191982
4900000	4	3959711	0.0389156		12900000	4	3536265	0.0286033		2100000	4	4845261	0.0627416		17700000	3	451823	0.17389		15700000	4	3440197	0.0198731
5000000	4	4615598	0.0297142		13000000	4	4514854	0.027904		2200000	4	4675981	0.0507921		17800000	3	160111	0.18563		15800000	4	3003906	0.0247294
5100000	4	6834195	0.0294562		13100000	4	4541011	0.042751		2300000	4	2893931	0.0692032		17900000	3	550916	0.123422		15900000	4	3196840	0.0585247
5200000	4	6665171	0.0286985		13200000	4	4682973	0.0346491		2400000	4	3516840	0.0698476		18000000	3	602076	0.127134		16000000	4	2295185	0.0548858
5300000	4	6658947	0.028786		13300000	4	5158075	0.038191		2500000	4	3101942	0.0669727		18100000	3	515920	0.141491		16100000	4	1571424	0.0607437
5400000	4	4971551	0.0441086		13400000	4	5135018	0.0414975		2600000	4	3001223	0.06317		18200000	3	278299	0.191442		16200000	4	556608	0.0571152
5500000	4	7184983	0.0588693		13500000	4	4990906	0.0666489		2700000	4	2934836	0.0808977		18300000	3	391316	0.142514		16300000	4	2551466	0.067898
5600000	4	4822410	0.0482817		13600000	4	4618480	0.0577258		2800000	4	3260116	0.0919761		18400000	3	517715	0.127977		16400000	4	2210926	0.0804138
5700000	4	3163393	0.0581168		13700000	4	3165756	0.0680108		2900000	4	2575500	0.0656293		18500000	3	481526	0.0929272		16500000	4	1396908	0.0587682
5800000	4	6240040	0.0441183		13800000	4	1706378	0.0405544		3000000	4	195256	0.179151		18600000	3	503388	0.0926355		16600000	4	1498635	0.0451662
5900000	4	4820555	0.0250208		13900000	4	3269875	0.0309647		3100000	4	3283997	0.0371583		18700000	3	416743	0.117214		16700000	4	3584718	0.0428111
6000000	4	5834045	0.0306312		14000000	4	3056170	0.0494062		3200000	4	3204260	0.0554234		18800000	3	288981	0.118776		16800000	4	1908396	0.0620907
6100000	4	5053293	0.0454122		14100000	4	3292176	0.0319166		3300000	4	4831075	0.039902		18900000	3	383058	0.150334		16900000	4	1255211	0.0412382
6200000	4	4258230	0.0480703		14200000	4	6222103	0.0233203		3400000	4	5781607	0.0492488		19000000	3	252767	0.124731		17000000	4	2331179	0.0588654
6300000	4	4478151	0.0352477		14300000	4	4770409	0.0316126		3500000	4	3883897	0.0604816		19100000	3	170955	0.190459		17100000	4	1606501	0.0461321
6400000	4	3337753	0.0380656		14400000	4	4843754	0.0306155		3600000	4	6154199	0.0469471		19200000	3	338490	0.137734		17200000	4	1724519	0.0418975
6500000	4	4318578	0.0407987		14500000	4	4531471	0.0379255		3700000	4	4550790	0.052626		19300000	3	465309	0.126616		17300000	4	2288625	0.034484
6600000	4	3888088	0.0387939		14600000	4	4701219	0.0278809		3800000	4	3609452	0.0402035		19400000	3	515424	0.116688		17400000	4	3026834	0.0372412
6700000	4	5184534	0.0342222		14700000	4	4501354	0.0294314		3900000	4	528636	0.0797577		19500000	3	317953	0.145758		17500000	4	1909751	0.0387064
6800000	4	7141364	0.0315986		14800000	4	5317169	0.0243547		4000000	4	4204158	0.0439606		19600000	3	605188	0.166986		17600000	4	2296289	0.065654
6900000	4	7452741	0.0305453		14900000	4	5294099	0.0325441		4100000	4	5468343	0.0513308		19700000	3	440859	0.17964		17700000	4	2943334	0.049745
7000000	4	4432500	0.0449097		15000000	4	5085958	0.0406411		4200000	4	5379535	0.0360338		19800000	3	577680	0.124395		17800000	4	2362178	0.0910276
7100000	4	6481738	0.0444081		15100000	4	4152671	0.0295981		4300000	4	5559969	0.0398107		19900000	3	453462	0.131276		17900000	4	2724086	0.0386968
7200000	4	6358455	0.0390867		15200000	4	3890590	0.0359694		4400000	4	5055091	0.0392815		20000000	3	353005	0.140951		18000000	4	5707088	0.0219387
7300000	4	6951450	0.0440235		15300000	4	3141671	0.0452836		4500000	4	6706946	0.0345727		20100000	3	429116	0.177913		18100000	4	5524050	0.0253746
7400000	4	6774885	0.0477254		15400000	4	3578539	0.0510919		4600000	4	4280659	0.0411952		20200000	3	342974	0.201868		18200000	4	2361852	0.0246732
7500000	4	4946585	0.0265299		15500000	4	4143938	0.0351235		4700000	4	2780942	0.0923867		20300000	3	313787	0.153822		18300000	4	2480079	0.0267464
7600000	4	5208414	0.0267767		15600000	4	5053771	0.03076		4800000	4	2122729	0.067614		20400000	3	521010	0.141871		18400000	4	1573085	0.0299649
7700000	4	3706148	0.0289901		15700000	4	4434070	0.0366885		4900000	4	3834014	0.0433187		20500000	3	540215	0.185535		18500000	4	2646135	0.0220284
7800000	4	4645563	0.031524		15800000	4	5484772	0.0341603		5000000	4	3219695	0.0329		20600000	3	566903	0.252158		18600000	4	2949807	0.0221528
7900000	4	6733948	0.024446		15900000	4	4036870	0.0738072		5100000	4	3798631	0.0434076		20700000	3	407779	0.178904		18700000	4	3052624	0.028733
8000000	4	7052494	0.0216152		16000000	4	2681329	0.0646921		5200000	4	4177535	0.061393		20800000	3	508187	0.165577		18800000	4	2253859	0.0297021
8100000	4	6118933	0.0214187		16100000	4	4586304	0.0703183		5300000	4	3396602	0.0957612		20900000	3	506200	0.169828		18900000	4	2862895	0.0385034
8200000	4	5920554	0.0217035		16200000	4	3549003	0.0687859		5400000	4	2989454	0.0646207		21000000	3	649203	0.184927		19000000	4	2172754	0.0477733
8300000	4	5177863	0.0333051		16300000	4	1750048	0.0895427		5500000	4	1965499	0.0656017		21100000	3	593544	0.19014		19100000	4	2275366	0.0413948
8400000	4	4961868	0.0445837		16400000	4	1757841	0.0687057		5600000	4	1946139	0.0432884		21200000	3	617956	0.16534		19200000	4	2561408	0.0543659
8500000	4	3691895	0.0330901		16500000	4	2272920	0.0439179		5700000	4	4058470	0.0640696		21300000	3	529348	0.148487		19300000	4	959293	0.0888968
8600000	4	5052896	0.023029		16600000	4	3133809	0.054706		5800000	4	3987674	0.0471321		21400000	3	501905	0.221532		19400000	4	1435795	0.0632001
8700000	4	4048366	0.0558135		16700000	4	5035205	0.0331766		5900000	4	3403268	0.0606867		21500000	3	343747	0.19075		19500000	4	2568199	0.0498035
8800000	4	5548581	0.0321716		16800000	4	4027588	0.0412231		6000000	4	2257933	0.0485605		21600000	3	332925	0.175166		19600000	4	1425170	0.0336059
8900000	4	4305237	0.0520534		16900000	4	4078240	0.0253029		6100000	4	3831254	0.0418681		21700000	3	470601	0.182625		19700000	4	508951	0.0366829
9000000	4	5234171	0.034415		17000000	4	6108213	0.0242662		6200000	4	2957336	0.059193		21800000	3	366365	0.192741		19800000	4	1314550	0.0431319
9100000	4	5575074	0.0251489		17100000	4	5223971	0.0192016		6300000	4	5415119	0.0500286		21900000	3	461548	0.154361		19900000	4	791073	0.0505202
9200000	4	5152951	0.0296195		17200000	4	5021153	0.0257095		6400000	4	4362541	0.0448404		22000000	3	423158	0.133275		20000000	4	1539333	0.0534653
9300000	4	4635978	0.0274502		17300000	4	4395556	0.0235617		6500000	4	3671789	0.0564013		22100000	3	284764	0.21394		20100000	4	471557	0.0780293
9400000	4	3387483	0.0284678		17400000	4	6379983	0.0376165		6600000	4	5136940	0.0557549		22200000	3	447759	0.216156		20200000	4	9740	0.0669056
9500000	4	3543930	0.0279908		17500000	4	6751365	0.0290754		6700000	4	6750528	0.0435135		22300000	3	574019	0.203813		20300000	4	60160	0.0588584
9600000	4	6457364	0.0280692		17600000	4	5393134	0.0308021		6800000	4	6323029	0.0397883		22400000	3	352731	0.169059		20400000	4	212721	0.0894869
9700000	4	6053691	0.0208024		17700000	4	5034753	0.0406994		6900000	4	4919807	0.0369192		22500000	3	220588	0.218543		20500000	4	674495	0.0892262
9800000	4	6126440	0.0194351		17800000	4	3696913	0.0337825		7000000	4	5400538	0.032298		22600000	3	355342	0.194856		20600000	4	1096904	0.0811331
9900000	4	5875464	0.0322293		17900000	4	2651931	0.0292696		7100000	4	4300034	0.0343548		22700000	3	338111	0.19621		20700000	4	1700801	0.0803203
10000000	4	6937008	0.0379666		18000000	4	3421982	0.0295293		7200000	4	4452613	0.033687		22800000	3	460171	0.155132		20800000	4	103626	0.152598
10100000	4	7855813	0.0351376		18100000	4	5687017	0.0304261		7300000	4	5997212	0.0365598		22900000	3	369636	0.158057		0	5	2124	0.229348
10200000	4	7025303	0.0363871		18200000	4	4455912	0.0428435		7400000	4	6218580	0.0266296		23000000	3	262666	0.153795		100000	5	1431	0.307199
10300000	4	6785229	0.0552523		18300000	4	3858348	0.0685246		7500000	4	5461352	0.0294408		23100000	3	383826	0.117772		200000	5	49476	0.338062
10400000	4	6153202	0.0324379		18400000	4	4291447	0.0628863		7600000	4	5496242	0.026476		23200000	3	387163	0.130447		300000	5	138107	0.215684
10500000	4	6057409	0.0279439		18500000	4	4580535	0.0571577		7700000	4	5717558	0.0220873		23300000	3	284944	0.121881		400000	5	163568	0.128772
10600000	4	5507315	0.0263046		18600000	4	3385618	0.050518		7800000	4	4715197	0.0366447		23400000	3	385056	0.142983		500000	5	520580	0.0933395
10700000	4	7150496	0.0345682		18700000	4	3202471	0.0584228		7900000	4	2476015	0.0682493		23500000	3	401996	0.152067		600000	5	615859	0.0703398
10800000	4	6541903	0.025007		18800000	4	3596631	0.0724826		8000000	4	2011792	0.0329794		23600000	3	138659	0.208444		700000	5	674155	0.0694992
10900000	4	7457981	0.0422447		18900000	4	3352286	0.0450738		8100000	4	3594385	0.0348142		23700000	3	241386	0.120805		800000	5	804142	0.0455299
11000000	4	5142737	0.0558448		19000000	4	2821963	0.0397937		8200000	4	4173367	0.0301212		23800000	3	306055	0.132889		900000	5	381157	0.0509163
11100000	4	4517909	0.035933		19100000	4	4181170	0.0540183		8300000	4	4906508	0.0432743		23900000	3	327929	0.122575		1000000	5	539293	0.0529911
11200000	4	4554558	0.0429735		19200000	4	4241625	0.0515246		8400000	4	3558621	0.0303008		24000000	3	308209	0.150686		1100000	5	348623	0.0701179
11300000	4	5281965	0.07426		19300000	4	3793427	0.0560151		8500000	4	3414014	0.0416575		24100000	3	321732	0.135857		1200000	5	325670	0.0342026
11400000	4	4638215	0.0533904		19400000	4	5202212	0.0677619		8600000	4	3147263	0.0469413		24200000	3	345014	0.147193		1300000	5	367123	0.0446523
11500000	4	5647250	0.0624872		19500000	4	2961576	0.0654863		8700000	4	3213843	0.0375446		24300000	3	349753	0.111086		1400000	5	307190	0.00957173
11600000	4	5474543	0.0317588		19600000	4	2423787	0.0490104		8800000	4	2636871	0.0344876		24400000	3	501694	0.123626		1500000	5	587321	0.0233114
11700000	4	6172642	0.0277892		19700000	4	2423715	0.0433666		8900000	4	2385404	0.0305852		24500000	3	499534	0.0986153		1600000	5	274558	0.0123408
11800000	4	7016042	0.0351196		19800000	4	3559513	0.039452		9000000	4	3695973	0.0287949		24600000	3	526744	0.109044		1700000	5	724219	0.0273958
11900000	4	5659153	0.0502973		19900000	4	3487572	0.0414724		9100000	4	3714009	0.0322553		24700000	3	493064	0.136177		1800000	5	464938	0.0166681
12000000	4	5844419	0.0432168		20000000	4	4864997	0.0409088		9200000	4	3735711	0.0336796		24800000	3	561275	0.147444		1900000	5	1879855	0.0118772
12100000	4	6128571	0.0365267		20100000	4	4228338	0.0379816		9300000	4	3609028	0.0342743		24900000	3	522692	0.128067		2000000	5	2836269	0.0125515
12200000	4	7550448	0.0672745		20200000	4	4869367	0.0786857		9400000	4	4835555	0.024702		25000000	3	403821	0.132733		2100000	5	3539324	0.0119484
12300000	4	4355192	0.0569814		20300000	4	4212212	0.0729728		9500000	4	4772057	0.0220921		25100000	3	483292	0.142553		2200000	5	4961637	0.0118193
12400000	4	3184576	0.103634		20400000	4	3398568	0.0412448		9600000	4	4938146	0.0260707		25200000	3	358406	0.149018		2300000	5	3415717	0.0114029
12500000	4	2777572	0.0711062		20500000	4	4384137	0.0389524		9700000	4	5103243	0.0359203		25300000	3	406155	0.204493		2400000	5	4220402	0.0117128
12600000	4	5419884	0.0336816		20600000	4	4968596	0.045451		9800000	4	4223157	0.0415267		25400000	3	655360	0.177339		2500000	5	4868609	0.0121183
12700000	4	5435092	0.0375875		20700000	4	3556641	0.066536		9900000	4	5119524	0.0428144		25500000	3	442368	0.227963		2600000	5	5408422	0.011891
12800000	4	4949096	0.0472466		20800000	4	4419760	0.0461952		10000000	4	5282150	0.0382974		25600000	3	528428	0.223307		2700000	5	7193101	0.0117838
12900000	4	4171686	0.0490373		20900000	4	4330749	0.0561765		10100000	4	5624067	0.0482008		25700000	3	725317	0.232338		2800000	5	6676572	0.0112213
13000000	4	4319019	0.0597141		21000000	4	3915840	0.0650126		10200000	4	5569807	0.0349109		25800000	3	493837	0.156935		2900000	5	5017413	0.0116243
13100000	4	3663066	0.0705505		21100000	4	1877854	0.0835871		10300000	4	6163869	0.0278975		25900000	3	571709	0.178134		3000000	5	4872514	0.0113119
13200000	4	5296577	0.0605783		21200000	4	1055456	0.105965		10400000	4	5355836	0.0251628		26000000	3	523841	0.170406		3100000	5	2660419	0.0115994
13300000	4	5349599	0.0326514		21300000	4	943260	0.100373		10500000	4	4040838	0.0324181		26100000	3	411400	0.148691		3200000	5	3893016	0.0123696
13400000	4	5238291	0.0349907		21400000	4	430163	0.121924		10600000	4	5222937	0.0272004		26200000	3	437573	0.181061		3300000	5	2536103	0.0135881
13500000	4	4820952	0.0296026		21500000	4	248973	0.205105		10700000	4	6176263	0.0195027		26300000	3	323814	0.202558		3400000	5	2624606	0.0151519
13600000	4	3831034	0.0347		0	5	31019	0.0889849		10800000	4	7659727	0.0184579		26400000	3	358700	0.173018		3500000	5	1590811	0.0150418
13700000	4	4700329	0.0472846		100000	5	160437	0.0146407		10900000	4	6172114	0.0160617		26500000	3	311520	0.178108		3600000	5	1678845	0.0157179
13800000	4	7158561	0.0279906		200000	5	3	0.013033		11000000	4	7379032	0.0182359		26600000	3	104905	0.217367		3700000	5	1555443	0.0121651
13900000	4	5322441	0.0221321		300000	5	32087	0.0258763		11100000	4	7132273	0.0193847		26700000	3	354519	0.180921		3800000	5	2375432	0.010985
14000000	4	3897011	0.0327898		400000	5	13	0.0140227		11200000	4	6879935	0.0235399		26800000	3	198040	0.194317		3900000	5	2987854	0.0116258
14100000	4	4908947	0.0319018		500000	5	28394	0.0603209		11300000	4	7650008	0.025954		26900000	3	85150	0.19036		4000000	5	3519093	0.0113211
14200000	4	5319511	0.0386225		600000	5	39437	0.0218142		11400000	4	5490181	0.0322185		27000000	3	19842	0.385977		4100000	5	3535665	0.011269
14300000	4	5482998	0.0666455		700000	5	70178	0.109285		11500000	4	6037307	0.0324745		27100000	3	7093	0.621593		4200000	5	4104146	0.0107287
14400000	4	4435760	0.0529706		800000	5	84563	0.0728031		11600000	4	6269322	0.0584834		0	4	1355622	0.109655		4300000	5	4472735	0.0133777
14500000	4	6774534	0.026838		900000	5	28678	0.0843153		11700000	4	8960195	0.0338397		100000	4	1158306	0.107968		4400000	5	5455382	0.0117944
14600000	4	5227757	0.0268571		1000000	5	25400	0.0265313		11800000	4	7354871	0.0411653		200000	4	3047676	0.096343		4500000	5	4953122	0.0120988
14700000	4	2073842	0.0416612		1100000	5	9345	0.0657644		11900000	4	8054903	0.0491879		300000	4	3089046	0.102305		4600000	5	4704522	0.0117049
14800000	4	1342360	0.021682		1200000	5	7166	0.0568506		12000000	4	8567245	0.0470271		400000	4	2543176	0.123475		4700000	5	3787117	0.0113624
14900000	4	6439877	0.0285328		1300000	5	3727	0.0308841		12100000	4	7618201	0.0296539		500000	4	2482235	0.105427		4800000	5	5581212	0.0114115
15000000	4	6183359	0.0366856		1400000	5	14531	0.1421		12200000	4	6475798	0.0236977		600000	4	2331850	0.0812351		4900000	5	5197263	0.0126498
15100000	4	4745405	0.0483744		1500000	5	2072	0.121095		12300000	4	4288821	0.0273052		700000	4	2711726	0.0810627		5000000	5	6384395	0.0117411
15200000	4	5048202	0.0507719		1600000	5	21977	0.103319		12400000	4	5625909	0.0393895		800000	4	3831717	0.0769124		5100000	5	6646052	0.0119372
15300000	4	5326694	0.0379636		1700000	5	123162	0.0550505		12500000	4	5232903	0.0303804		900000	4	3495971	0.0749157		5200000	5	7196144	0.0115603
15400000	4	4356682	0.0590117		1800000	5	164595	0.0667816		12600000	4	4441145	0.0343789		1000000	4	3603193	0.0487602		5300000	5	5693493	0.0118698
15500000	4	2717997	0.0602447		1900000	5	1206517	0.086592		12700000	4	3480199	0.0525793		1100000	4	4330277	0.0572742		5400000	5	4940995	0.0116946
15600000	4	3953392	0.0514198		2000000	5	1448422	0.103749		12800000	4	3944636	0.0497299		1200000	4	2431130	0.0570696		5500000	5	3918330	0.0143296
15700000	4	4869467	0.0351926		2100000	5	314578	0.126371		12900000	4	3383429	0.0585407		1300000	4	2452759	0.0505251		5600000	5	2957996	0.0133486
15800000	4	7482389	0.041945		2200000	5	1806807	0.121325		13000000	4	3426599	0.0470838		1400000	4	3489136	0.0584312		5700000	5	2269798	0.0112675
15900000	4	7845641	0.0470086		2300000	5	1662546	0.0915877		13100000	4	2744321	0.0513443		1500000	4	2344233	0.06931		5800000	5	2478527	0.0130004
16000000	4	5570575	0.027877		2400000	5	8538733	0.0519297		13200000	4	1018677	0.0639157		1600000	4	1440828	0.131455		5900000	5	1653001	0.0105231
16100000	4	4920467	0.046701		2500000	5	9276015	0.0388727		13300000	4	2099407	0.0906889		1700000	4	1880411	0.117353		6000000	5	2287682	0.0128585
16200000	4	4814921	0.0497854		2600000	5	6208418	0.0400633		13400000	4	3753415	0.0867362		1800000	4	1120878	0.127494		6100000	5	2554812	0.0130829
16300000	4	5131395	0.0569683		2700000	5	6811556	0.088339		13500000	4	6213525	0.0383334		1900000	4	1403388	0.126432		6200000	5	3304808	0.0118175
16400000	4	4805400	0.0676593		2800000	5	5394838	0.07023		13600000	4	5417447	0.0347968		2000000	4	3061995	0.0771364		6300000	5	2831044	0.0115783
16500000	4	5545960	0.0852843		2900000	5	5699713	0.0695149		13700000	4	4279128	0.0611808		2100000	4	3663512	0.0620615		6400000	5	4741574	0.0116237
16600000	4	6593911	0.0656393		3000000	5	3993352	0.0835875		13800000	4	3836653	0.0683874		2200000	4	1714943	0.104217		6500000	5	3645875	0.0135892
16700000	4	5400344	0.0997533		3100000	5	3938956	0.0940825		13900000	4	4235168	0.0664547		2300000	4	1653197	0.0814831		6600000	5	4415679	0.0124579
16800000	4	4971715	0.0820102		3200000	5	2284141	0.0253774		14000000	4	4593299	0.0542394		2400000	4	1771057	0.107996		6700000	5	3545878	0.0122816
16900000	4	5025633	0.0402194		3300000	5	4205419	0.0313549		14100000	4	6577112	0.0513441		2500000	4	1252652	0.0997622		6800000	5	2494575	0.0155407
17000000	4	4638782	0.0592533		3400000	5	3112322	0.0251211		14200000	4	6940825	0.0525428		2600000	4	1893291	0.0701817		6900000	5	1869887	0.0157475
17100000	4	3440494	0.0789689		3500000	5	5993748	0.0183737		14300000	4	5436681	0.0480172		2700000	4	4316584	0.0584981		7000000	5	1907624	0.0143101
17200000	4	3587267	0.058013		3600000	5	7848247	0.0161971		14400000	4	4896062	0.0550184		2800000	4	3804735	0.0566293		7100000	5	1657434	0.0128693
17300000	4	5104044	0.0606753		3700000	5	9397828	0.0150656		14500000	4	5418827	0.0577222		2900000	4	3877833	0.0563625		7200000	5	2260446	0.0139724
17400000	4	4521839	0.0777475		3800000	5	8857237	0.0156181		14600000	4	6623178	0.0490323		3000000	4	3771251	0.0602521		7300000	5	3004227	0.0115252
17500000	4	3993364	0.0927805		3900000	5	8541001	0.0136006		14700000	4	7239059	0.0330863		3100000	4	5127859	0.0626803		7400000	5	3280131	0.011291
17600000	4	3481145	0.0556098		4000000	5	6557086	0.0145989		14800000	4	6677475	0.0292532		3200000	4	4862501	0.0573591		7500000	5	3802216	0.0117304
17700000	4	3542201	0.0894779		4100000	5	10051788	0.0122817		14900000	4	5060313	0.0435581		3300000	4	2886938	0.115407		7600000	5	3995243	0.0119229
17800000	4	2484615	0.0974741		4200000	5	6893680	0.0133493		15000000	4	4671588	0.0548993		3400000	4	2463429	0.0558165		7700000	5	4853213	0.0117807
17900000	4	4282521	0.123375		4300000	5	10538130	0.0129107		15100000	4	3122044	0.0243099		3500000	4	3923075	0.0575401		7800000	5	4712503	0.0121305
18000000	4	4091715	0.146094		4400000	5	9303889	0.0125948		15200000	4	5696952	0.0298116		3600000	4	3000953	0.0673037		7900000	5	5318846	0.0119048
18100000	4	3632330	0.0706729		4500000	5	8883534	0.0145426		15300000	4	5492893	0.0287294		3700000	4	4264985	0.0644852		8000000	5	4410684	0.0137311
18200000	4	4490075	0.0760472		4600000	5	7575441	0.0200785		15400000	4	6365271	0.0340537		3800000	4	5025511	0.0467484		8100000	5	6024872	0.0122008
18300000	4	4288953	0.100475		4700000	5	10217447	0.0188015		15500000	4	6690983	0.0276702		3900000	4	4452130	0.0876115		8200000	5	5348229	0.0117787
18400000	4	3440136	0.0732241		4800000	5	8003617	0.021621		15600000	4	5730390	0.0392195		4000000	4	4339787	0.0740951		8300000	5	6826832	0.0116473
18500000	4	2930059	0.100865		4900000	5	7225040	0.0282186		15700000	4	5839174	0.0249979		4100000	4	3050772	0.104237		8400000	5	3719053	0.0116685
18600000	4	4907512	0.0317205		5000000	5	8336307	0.0302979		15800000	4	5994713	0.031881		4200000	4	5959724	0.102933		8500000	5	2378690	0.0102057
18700000	4	5203273	0.041069		5100000	5	7998038	0.0168233		15900000	4	5294383	0.0385054		4300000	4	7052124	0.105853		8600000	5	1942103	0.0123859
18800000	4	6658362	0.0487798		5200000	5	7353058	0.0145576		16000000	4	5780686	0.024736		4400000	4	2905801	0.0927607		8700000	5	1594247	0.0111132
18900000	4	4862866	0.035974		5300000	5	6791478	0.017641		16100000	4	3378932	0.0391685		4500000	4	3059142	0.132126		8800000	5	956871	0.0110958
19000000	4	4311583	0.0499514		5400000	5	4501693	0.0170667		16200000	4	5513060	0.0268108		4600000	4	2084247	0.119488		8900000	5	1009865	0.010927
19100000	4	4109765	0.0427047		5500000	5	6136343	0.0183636		16300000	4	5983021	0.0319887		4700000	4	3140612	0.0908729		9000000	5	341832	0.0101525
19200000	4	4912958	0.0829756		5600000	5	5771168	0.0145626		16400000	4	6031159	0.0299824		4800000	4	3571057	0.112906		9100000	5	1065236	0.0118574
19300000	4	7035805	0.0823459		5700000	5	8429427	0.013942		16500000	4	5443253	0.0358209		4900000	4	3015890	0.0519602		9200000	5	2157066	0.0133846
19400000	4	6708935	0.0795162		5800000	5	6969306	0.0126189		16600000	4	3747158	0.029958		5000000	4	3775089	0.0536564		9300000	5	3076645	0.0150695
19500000	4	4520411	0.0916879		5900000	5	8337713	0.0135759		16700000	4	4592948	0.0496909		5100000	4	4653298	0.0399819		9400000	5	1519277	0.0126745
19600000	4	153804	0.129613		6000000	5	6862759	0.0125797		16800000	4	3817729	0.0497155		5200000	4	3688695	0.0747368		9500000	5	1746507	0.0128145
19700000	4	3551202	0.0863658		6100000	5	7708768	0.012344		16900000	4	2869462	0.0548934		5300000	4	2801218	0.0532388		9600000	5	823530	0.0125446
19800000	4	5246057	0.0631629		6200000	5	6918292	0.0156888		17000000	4	5898425	0.058394		5400000	4	4109459	0.0656981		9700000	5	1799746	0.0122617
19900000	4	4618160	0.0759518		6300000	5	4929207	0.0262172		17100000	4	4988973	0.0356226		5500000	4	4404657	0.0424002		9800000	5	2473746	0.0112739
20000000	4	2782336	0.0745304		6400000	5	3852584	0.020829		17200000	4	4864575	0.0397786		5600000	4	3556496	0.0831253		9900000	5	3947132	0.0121693
20100000	4	3509028	0.065789		6500000	5	2855319	0.0169687		17300000	4	659723	0.0465447		5700000	4	5473269	0.053764		10000000	5	3963549	0.0113927
20200000	4	4934246	0.0546148		6600000	5	4392874	0.0121757		17400000	4	3013035	0.0364449		5800000	4	6492737	0.0589364		10100000	5	3829717	0.0111387
20300000	4	3638738	0.0705593		6700000	5	6641237	0.0136381		17500000	4	5513328	0.0307865		5900000	4	6458954	0.0741415		10200000	5	3286987	0.0114572
20400000	4	2108569	0.064922		6800000	5	9474175	0.016088		17600000	4	7603667	0.0292267		6000000	4	4288371	0.040295		10300000	5	3290376	0.0111448
20500000	4	443217	0.0863589		6900000	5	10762590	0.0163395		17700000	4	2947206	0.0274737		6100000	4	5262638	0.0362736		10400000	5	2192504	0.0116433
20600000	4	218193	0.151686		7000000	5	10650216	0.0124822		17800000	4	642752	0.0541025		6200000	4	5316193	0.0366035		10500000	5	3275968	0.0117781
20700000	4	79308	0.321238		7100000	5	6623382	0.0124085		17900000	4	7708683	0.0536588		6300000	4	4048514	0.0298568		10600000	5	2460959	0.0116457
20800000	4	35229	0.195903		7200000	5	7425824	0.0118021		18000000	4	7194703	0.077389		6400000	4	3594809	0.0456338		10700000	5	3975420	0.0116925
20900000	4	22195	0.230887		7300000	5	5230689	0.0126402		18100000	4	7745119	0.0869151		6500000	4	3412624	0.0349177		10800000	5	3509783	0.0123296
21000000	4	172897	0.130748		7400000	5	4738740	0.0127003		18200000	4	8927205	0.0715844		6600000	4	4061526	0.0364455		10900000	5	2471880	0.0133104
21100000	4	395738	0.141398		7500000	5	7424597	0.0140911		18300000	4	6732093	0.0648329		6700000	4	5117345	0.0444303		11000000	5	2438946	0.0128496
21200000	4	315071	0.127354		7600000	5	6510853	0.0135058		18400000	4	5924046	0.0614602		6800000	4	4070960	0.0356311		11100000	5	2697164	0.0120894
21300000	4	320560	0.126442		7700000	5	9179253	0.0119759		18500000	4	7370427	0.0840247		6900000	4	4556936	0.0268158		11200000	5	2863426	0.0119392
21400000	4	160871	0.132863		7800000	5	10441258	0.015611		18600000	4	3313680	0.0579816		7000000	4	4868560	0.0278693		11300000	5	3862669	0.0117559
21500000	4	122769	0.133763		7900000	5	9692970	0.0128683		18700000	4	2696885	0.0530977		7100000	4	6853823	0.041846		11400000	5	3713330	0.0112602
21600000	4	39491	0.126088		8000000	5	10033762	0.0132848		18800000	4	6070078	0.0660648		7200000	4	4798098	0.025416		11500000	5	4428114	0.0119459
21700000	4	19423	0.0628963		8100000	5	6828765	0.0128222		18900000	4	6891070	0.0829154		7300000	4	5141871	0.0214014		11600000	5	4584703	0.0115611
21800000	4	10757	0.0655603		8200000	5	6025017	0.0142643		19000000	4	4590340	0.0414189		7400000	4	5091315	0.0238571		11700000	5	4826175	0.0119113
21900000	4	6723	0.0294992		8300000	5	3668161	0.0151714		19100000	4	5882963	0.0723165		7500000	4	4531006	0.0328634		11800000	5	3604600	0.0113867
22000000	4	3546	0.0634132		8400000	5	4122642	0.020249		19200000	4	6644393	0.0627952		7600000	4	6098748	0.0332123		11900000	5	3640826	0.0113205
22100000	4	23163	0.079213		8500000	5	1918433	0.0236118		19300000	4	3809113	0.0407207		7700000	4	5671601	0.0907322		12000000	5	4355337	0.0129159
22200000	4	960	0.0511351		8600000	5	4163799	0.0169567		19400000	4	2775876	0.0432494		7800000	4	7051267	0.0651796		12100000	5	4532258	0.0152052
22300000	4	3008	0.0366952		8700000	5	1033344	0.012861		19500000	4	5215536	0.0305147		7900000	4	7297017	0.0872528		12200000	5	3684910	0.0129719
22400000	4	14656	0.212643		8800000	5	5198364	0.0140482		19600000	4	5541364	0.0643821		8000000	4	5308123	0.0757276		12300000	5	3766960	0.0122531
22500000	4	14	0.00803668		8900000	5	5637277	0.0172106		19700000	4	4497828	0.0437204		8100000	4	3633225	0.0796058		12400000	5	3138634	0.0125761
22600000	4	0			9000000	5	5846524	0.0154664		19800000	4	3588597	0.0490056		8200000	4	4035180	0.0754263		12500000	5	4254691	0.0107003
22700000	4	1120	0.0701041		9100000	5	8086015	0.0135168		19900000	4	6347068	0.0463716		8300000	4	5193247	0.0562712		12600000	5	3810254	0.0117049
22800000	4	26757	0.0611858		9200000	5	8296227	0.0121149		20000000	4	5448607	0.040834		8400000	4	4977785	0.0623755		12700000	5	3636398	0.0123355
22900000	4	4952	0.241855		9300000	5	9841005	0.0127101		20100000	4	4826765	0.0457984		8500000	4	4001280	0.0961559		12800000	5	3457796	0.0114558
23000000	4	6285	0.0187446		9400000	5	9252009	0.0120218		20200000	4	4136041	0.0477875		8600000	4	2785142	0.112706		12900000	5	3975789	0.0117202
23100000	4	47360	0.106173		9500000	5	8323716	0.0136618		20300000	4	4063323	0.057257		8700000	4	2985589	0.0564528		13000000	5	4059408	0.011832
23200000	4	762	0.0950289		9600000	5	5855225	0.0124392		20400000	4	4951031	0.0451421		8800000	4	3499054	0.046113		13100000	5	5667698	0.0122774
23300000	4	5457	0.166801		9700000	5	5486635	0.0123174		20500000	4	5500665	0.0595893		8900000	4	4461729	0.0642464		13200000	5	3679938	0.0115686
23400000	4	23023	0.0850211		9800000	5	6591772	0.0117888		20600000	4	3762330	0.0991113		9000000	4	4644737	0.0611799		13300000	5	4580269	0.011093
23500000	4	3373	0.0458275		9900000	5	8340719	0.0132972		20700000	4	2104171	0.109809		9100000	4	4395119	0.0504575		13400000	5	3889237	0.0118138
0	5	560595	0.0506868		10000000	5	7283393	0.0120885		20800000	4	2194443	0.113806		9200000	4	4189259	0.0411461		13500000	5	6717936	0.0122079
100000	5	1101916	0.0262119		10100000	5	7042732	0.0120345		20900000	4	2061571	0.116884		9300000	4	4589772	0.0470461		13600000	5	6767637	0.0131619
200000	5	1949519	0.0222717		10200000	5	6225288	0.0133967		21000000	4	1599180	0.0991804		9400000	4	4544849	0.0357954		13700000	5	7033549	0.0120303
300000	5	2110296	0.0210851		10300000	5	6055822	0.0121796		21100000	4	1990554	0.112628		9500000	4	4494823	0.0501845		13800000	5	6243266	0.0122596
400000	5	3890846	0.0236068		10400000	5	6581430	0.0136163		21200000	4	2652451	0.127067		9600000	4	5282275	0.0359417		13900000	5	5482627	0.0131972
500000	5	4917143	0.0274579		10500000	5	5090656	0.012509		21300000	4	1942723	0.0822841		9700000	4	5665241	0.0462378		14000000	5	4265216	0.0139755
600000	5	6150303	0.0322046		10600000	5	4227858	0.0117194		21400000	4	1038095	0.105076		9800000	4	4624529	0.0801543		14100000	5	2731049	0.0119438
700000	5	7544638	0.0216688		10700000	5	5997208	0.011377		21500000	4	849101	0.0829169		9900000	4	3509550	0.0228554		14200000	5	2522297	0.0137692
800000	5	9048704	0.0140014		10800000	5	5363393	0.0118353		21600000	4	1058131	0.0965599		10000000	4	4021297	0.0317816		14300000	5	1843084	0.0106919
900000	5	10067565	0.0141691		10900000	5	7731475	0.0118242		21700000	4	800299	0.111642		10100000	4	5220910	0.0408556		14400000	5	2266251	0.0115735
1000000	5	9708749	0.0152874		11000000	5	6148053	0.0121689		21800000	4	1002058	0.0794245		10200000	4	4914689	0.0294036		14500000	5	2219382	0.0123003
1100000	5	8337718	0.0145915		11100000	5	7233232	0.0125841		21900000	4	1587259	0.0861732		10300000	4	4302729	0.0683913		14600000	5	1340606	0.0111081
1200000	5	8185945	0.0155597		11200000	5	8303658	0.0114372		22000000	4	2184059	0.0768458		10400000	4	6243114	0.0413149		14700000	5	1210269	0.0123949
1300000	5	8922903	0.0272006		11300000	5	9108154	0.0136917		22100000	4	3604112	0.0729632		10500000	4	5099995	0.0433355		14800000	5	1081707	0.0117555
1400000	5	7994724	0.0393264		11400000	5	9385089	0.0131929		22200000	4	3713799	0.0499395		10600000	4	6483399	0.0306165		14900000	5	1456970	0.0126922
1500000	5	7161482	0.0264272		11500000	5	7908962	0.0151555		22300000	4	4462880	0.0643021		10700000	4	8511603	0.0362998		15000000	5	3000534	0.0124871
1600000	5	7092415	0.0257483		11600000	5	4410006	0.0219124		22400000	4	5369702	0.172925		10800000	4	5330304	0.0490204		15100000	5	5284016	0.0120538
1700000	5	4178742	0.0207537		11700000	5	4863338	0.0178685		22500000	4	451145	0.163602		10900000	4	3587717	0.0362516		15200000	5	4239517	0.0113395
1800000	5	5039998	0.0165426		11800000	5	3263218	0.0160294		22600000	4	2281	0.0465906		11000000	4	5821386	0.0425809		15300000	5	4067244	0.0112626
1900000	5	5025515	0.0177515		11900000	5	4906647	0.015542		22700000	4	6533	0.0248721		11100000	4	5550237	0.0620132		15400000	5	3229581	0.0122367
2000000	5	5776481	0.022245		12000000	5	5469213	0.0131752		22800000	4	153	0.292778		11200000	4	5574906	0.0337355		15500000	5	4988954	0.0116623
2100000	5	7089992	0.0216577		12100000	5	6867376	0.0126531		22900000	4	3825	0.077588		11300000	4	5094976	0.0206122		15600000	5	4441837	0.0127063
2200000	5	8761451	0.0176012		12200000	5	6715608	0.014032		23000000	4	233673	0.233698		11400000	4	5378223	0.0281611		15700000	5	5549984	0.0119668
2300000	5	6007779	0.01351		12300000	5	5677844	0.0129954		23100000	4	456450	0.203978		11500000	4	6385532	0.0315367		15800000	5	5425604	0.0122613
2400000	5	7066165	0.013697		12400000	5	6301271	0.0121544		23200000	4	13854	0.0374972		11600000	4	3951915	0.0270189		15900000	5	4681712	0.0124363
2500000	5	7874025	0.0126462		12500000	5	6769394	0.0123779		23300000	4	26169	0.628598		11700000	4	1421397	0.0515204		16000000	5	2415081	0.0117161
2600000	5	6259382	0.0128025		12600000	5	6771005	0.0121519		23400000	4	19148	0.0240446		11800000	4	2682770	0.0590035		16100000	5	3125784	0.0121602
2700000	5	8059729	0.0130951		12700000	5	7524243	0.0120345		23500000	4	7517	0.0280044		11900000	4	5785596	0.0892684		16200000	5	1376055	0.0134133
2800000	5	5794035	0.0172169		12800000	5	6451350	0.013276		23600000	4	40583	0.142735		12000000	4	4649958	0.151135		16300000	5	3278496	0.0150293
2900000	5	7287921	0.013409		12900000	5	6896241	0.0117174		23700000	4	240	0.00839594		12100000	4	4038637	0.167204		16400000	5	3279915	0.0158304
3000000	5	8627462	0.0149607		13000000	5	6783552	0.0131448		23800000	4	18946	0.124793		12200000	4	6109801	0.085741		16500000	5	3343041	0.0125109
3100000	5	9103439	0.0125863		13100000	5	8691927	0.012514		23900000	4	0			12300000	4	4074145	0.0609718		16600000	5	2867210	0.0139921
3200000	5	9138448	0.0125048		13200000	5	7219317	0.0124816		24000000	4	7055	0.0349102		12400000	4	4296686	0.133068		16700000	5	3822351	0.0122417
3300000	5	11235081	0.0119261		13300000	5	10112594	0.0129551		24100000	4	95171	0.232979		12500000	4	4519503	0.173845		16800000	5	3654524	0.0122056
3400000	5	6994696	0.0115217		13400000	5	7729718	0.0124421		24200000	4	657	0.788973		12600000	4	3613353	0.102196		16900000	5	2530717	0.0132748
3500000	5	9855696	0.0118445		13500000	5	8480269	0.0164291		0	5	513523	0.1742		12700000	4	4351669	0.0585457		17000000	5	3164432	0.0124503
3600000	5	7039643	0.0115126		13600000	5	5422185	0.021291		100000	5	1123933	0.0530325		12800000	4	4299123	0.0460173		17100000	5	2904669	0.0127689
3700000	5	9101653	0.0129775		13700000	5	4814512	0.0157054		200000	5	3520793	0.0339081		12900000	4	4399901	0.0471604		17200000	5	3885621	0.0123646
3800000	5	8173462	0.0120823		13800000	5	4094455	0.0136737		300000	5	4844353	0.0419134		13000000	4	4221533	0.0822944		17300000	5	3433015	0.0114683
3900000	5	6867206	0.0136767		13900000	5	4107801	0.0127525		400000	5	7256921	0.0215108		13100000	4	4487654	0.0629744		17400000	5	3911631	0.0122555
4000000	5	8171503	0.0106415		14000000	5	7441639	0.0171312		500000	5	5111228	0.0133942		13200000	4	5449335	0.0298854		17500000	5	4465644	0.0134689
4100000	5	5898700	0.0141322		14100000	5	6020991	0.0118253		600000	5	7123795	0.0154892		13300000	4	4589147	0.0333906		17600000	5	3331679	0.0145051
4200000	5	5137566	0.0189061		14200000	5	8452512	0.0123369		700000	5	7462305	0.0163713		13400000	4	4347372	0.0356809		17700000	5	4734276	0.0153528
4300000	5	6877312	0.0162957		14300000	5	8556269	0.0128033		800000	5	7714811	0.0132201		13500000	4	4753080	0.0289118		17800000	5	4908472	0.0143241
4400000	5	5469926	0.0146482		14400000	5	8061596	0.0131358		900000	5	7926434	0.0121994		13600000	4	3748724	0.0302091		17900000	5	6855897	0.012244
4500000	5	7268468	0.0135616		14500000	5	7342284	0.0128303		1000000	5	7510925	0.0167706		13700000	4	3133715	0.0280571		18000000	5	6605770	0.011278
4600000	5	6748329	0.0119881		14600000	5	8527830	0.0121918		1100000	5	8260709	0.0151542		13800000	4	2798572	0.0551065		18100000	5	7445293	0.012018
4700000	5	7527312	0.0121928		14700000	5	7732546	0.0115603		1200000	5	7440384	0.0120904		13900000	4	2940991	0.0493415		18200000	5	3586142	0.0118482
4800000	5	5898606	0.0120808		14800000	5	8763392	0.0110798		1300000	5	8714043	0.0125516		14000000	4	2696629	0.0436854		18300000	5	4282878	0.0127522
4900000	5	9614594	0.0123328		14900000	5	8317042	0.0125758		1400000	5	7716334	0.0136361		14100000	4	4213952	0.0557687		18400000	5	3143390	0.0122542
5000000	5	8387820	0.0135299		15000000	5	7646522	0.013402		1500000	5	6388104	0.0172416		14200000	4	3655063	0.0645708		18500000	5	4929404	0.0113779
5100000	5	11386164	0.0129991		15100000	5	6582197	0.0127738		1600000	5	7414789	0.0168417		14300000	4	5260336	0.0263436		18600000	5	3975767	0.0112513
5200000	5	9801468	0.0124067		15200000	5	5707354	0.0137791		1700000	5	6780489	0.0186947		14400000	4	5703062	0.0359822		18700000	5	5523666	0.0119956
5300000	5	11582388	0.013416		15300000	5	6831022	0.0129617		1800000	5	7124292	0.0264048		14500000	4	4255328	0.0445287		18800000	5	3552201	0.0128211
5400000	5	9077252	0.0120592		15400000	5	6155232	0.0125147		1900000	5	6772181	0.0272487		14600000	4	2800047	0.0353634		18900000	5	4458299	0.0127594
5500000	5	8286867	0.0141783		15500000	5	7525099	0.0127655		2000000	5	7937384	0.0184312		14700000	4	3979046	0.0355537		19000000	5	3802203	0.0120292
5600000	5	9846291	0.0143613		15600000	5	7301863	0.0118219		2100000	5	6813803	0.0174401		14800000	4	6038784	0.0444345		19100000	5	3321910	0.0129113
5700000	5	5244375	0.0143933		15700000	5	9099085	0.0133677		2200000	5	6641201	0.0146746		14900000	4	5587586	0.043492		19200000	5	3081321	0.0157395
5800000	5	9558702	0.0135171		15800000	5	5238420	0.0138085		2300000	5	5897699	0.0132458		15000000	4	6059935	0.024131		19300000	5	2678170	0.0176132
5900000	5	9300549	0.0134036		15900000	5	8528926	0.0209848		2400000	5	5515427	0.0179633		15100000	4	4828447	0.022869		19400000	5	2737413	0.0147614
6000000	5	8273888	0.0154993		16000000	5	4985786	0.0176827		2500000	5	4842769	0.0181901		15200000	4	3050748	0.0202945		19500000	5	1876392	0.0136688
6100000	5	8521895	0.0170547		16100000	5	5865876	0.017469		2600000	5	5421316	0.0184809		15300000	4	4971283	0.0195534		19600000	5	2486140	0.0107532
6200000	5	6253025	0.020421		16200000	5	4330705	0.020791		2700000	5	5736729	0.0247927		15400000	4	4344191	0.0332114		19700000	5	1090873	0.013036
6300000	5	7583453	0.0153481		16300000	5	3577373	0.0218887		2800000	5	2624485	0.0218708		15500000	4	5252016	0.0205343		19800000	5	2078954	0.0118339
6400000	5	5757666	0.0151173		16400000	5	3272613	0.0189448		2900000	5	3877669	0.0211865		15600000	4	3828949	0.0223582		19900000	5	1688458	0.0119184
6500000	5	6815342	0.014181		16500000	5	4768409	0.0151125		3000000	5	1729142	0.0229292		15700000	4	4281610	0.0189704		20000000	5	456135	0.0142466
6600000	5	8352230	0.0139581		16600000	5	5416220	0.0142124		3100000	5	4660452	0.0147437		15800000	4	7092792	0.0192025		20100000	5	300486	0.015769
6700000	5	9932720	0.0136312		16700000	5	7177394	0.012415		3200000	5	7385020	0.0124247		15900000	4	6887077	0.0225343		20200000	5	33609	0.0174621
6800000	5	10505956	0.0120488		16800000	5	8593905	0.012097		3300000	5	6464268	0.0138881		16000000	4	5713031	0.0338295		20300000	5	250639	0.0138139
6900000	5	10868815	0.012248		16900000	5	6854736	0.0118894		3400000	5	9713930	0.0160174		16100000	4	5399503	0.0299587		20400000	5	602663	0.0278995
7000000	5	9276840	0.0136351		17000000	5	9752413	0.0124361		3500000	5	8053591	0.01501		16200000	4	7134097	0.0208023		20500000	5	1555288	0.027466
7100000	5	11118291	0.014665		17100000	5	7973298	0.0115747		3600000	5	8036841	0.0140692		16300000	4	5057057	0.0261134		20600000	5	1273521	0.0204727
7200000	5	10419694	0.0136593		17200000	5	8879479	0.0121623		3700000	5	4659040	0.0140705		16400000	4	5897044	0.0337963		20700000	5	183124	0.0228958
7300000	5	11067681	0.0155088		17300000	5	9024398	0.0129786		3800000	5	4729225	0.0152544		16500000	4	4954899	0.027434		20800000	5	0
7400000	5	9294465	0.0147475		17400000	5	9731086	0.0131929		3900000	5	4771670	0.0175036		16600000	4	3945354	0.026801
7500000	5	8719309	0.0128747		17500000	5	10765698	0.0122884		4000000	5	6892462	0.0162873		16700000	4	2544785	0.0233136
7600000	5	6999046	0.0124534		17600000	5	7827129	0.0125211		4100000	5	9679173	0.0143287		16800000	4	2875101	0.0281772
7700000	5	8830512	0.013454		17700000	5	6811754	0.013679		4200000	5	8503140	0.0125551		16900000	4	3183941	0.0276394
7800000	5	8792689	0.0129772		17800000	5	5746970	0.0135626		4300000	5	9815598	0.0130179		17000000	4	3712397	0.0402385
7900000	5	10330759	0.0124613		17900000	5	6339559	0.0130988		4400000	5	8824635	0.0121026		17100000	4	3168326	0.0253227
8000000	5	11619067	0.0120925		18000000	5	6405683	0.0133389		4500000	5	7514518	0.0117128		17200000	4	5172594	0.0336306
8100000	5	8840172	0.0119167		18100000	5	8070607	0.0148741		4600000	5	5872923	0.0154965		17300000	4	5792350	0.0457504
8200000	5	10236497	0.0113464		18200000	5	7050844	0.0170518		4700000	5	5368885	0.0199544		17400000	4	5701565	0.0648323
8300000	5	7536738	0.0121835		18300000	5	7013686	0.0149603		4800000	5	4406513	0.0151552		17500000	4	3560050	0.0531916
8400000	5	8642597	0.0131637		18400000	5	7597429	0.0141377		4900000	5	6018954	0.0116054		17600000	4	4037457	0.0656865
8500000	5	6390976	0.0134347		18500000	5	5624245	0.0169517		5000000	5	5977291	0.012269		17700000	4	3605137	0.0552678
8600000	5	8501076	0.0122578		18600000	5	6704257	0.0128572		5100000	5	6429945	0.0128501		17800000	4	2143563	0.0281811
8700000	5	6745901	0.0126907		18700000	5	5134053	0.0147567		5200000	5	6131490	0.0155374		17900000	4	5705692	0.0228068
8800000	5	8831742	0.0126978		18800000	5	5740058	0.0163539		5300000	5	5243711	0.0214483		18000000	4	5919081	0.0210337
8900000	5	8114174	0.0126506		18900000	5	5634433	0.0126831		5400000	5	3469955	0.0156463		18100000	4	4437594	0.0275295
9000000	5	8998850	0.0123953		19000000	5	5484321	0.0124852		5500000	5	4775219	0.011571		18200000	4	2525356	0.0364375
9100000	5	8453533	0.0122124		19100000	5	6498789	0.01369		5600000	5	3783685	0.0135697		18300000	4	4073519	0.0303908
9200000	5	7764724	0.0126655		19200000	5	8119015	0.0126378		5700000	5	6545464	0.0165984		18400000	4	4804033	0.0245681
9300000	5	6643206	0.0119136		19300000	5	6116361	0.0148134		5800000	5	5445671	0.0163463		18500000	4	4888422	0.0163471
9400000	5	7161900	0.0122979		19400000	5	6562669	0.0156457		5900000	5	6325957	0.0175497		18600000	4	4903644	0.0183924
9500000	5	7473413	0.0132034		19500000	5	4330636	0.014243		6000000	5	3640686	0.0161542		18700000	4	3287682	0.023513
9600000	5	10064645	0.0124135		19600000	5	4957998	0.012518		6100000	5	7450662	0.0149079		18800000	4	2990231	0.0391625
9700000	5	10318285	0.0115139		19700000	5	4241277	0.0122309		6200000	5	6000804	0.0174698		18900000	4	3429871	0.0434051
9800000	5	9990765	0.012258		19800000	5	6876078	0.0139144		6300000	5	7343538	0.0175561		19000000	4	2141704	0.0218344
9900000	5	10918732	0.0125156		19900000	5	5831724	0.0125453		6400000	5	7725329	0.0130926		19100000	4	2044973	0.0321762
10000000	5	11967016	0.0126132		20000000	5	8193857	0.0129214		6500000	5	7044751	0.0165851		19200000	4	3401819	0.0283094
10100000	5	12433511	0.0133096		20100000	5	7644461	0.0135136		6600000	5	10139559	0.0172209		19300000	4	4574701	0.0328384
10200000	5	12165119	0.0150129		20200000	5	7313186	0.022684		6700000	5	9368179	0.0145379		19400000	4	4571786	0.028791
10300000	5	10537359	0.013976		20300000	5	6802148	0.0135216		6800000	5	10696490	0.0143147		19500000	4	4003121	0.0307698
10400000	5	9823721	0.0126313		20400000	5	6501235	0.014423		6900000	5	7653094	0.0138884		19600000	4	5452325	0.056537
10500000	5	10211566	0.0123392		20500000	5	7058803	0.0148843		7000000	5	7955407	0.0121658		19700000	4	4271370	0.039468
10600000	5	10131390	0.0120728		20600000	5	7790377	0.0181017		7100000	5	8663212	0.013434		19800000	4	5383690	0.02726
10700000	5	11707689	0.0125114		20700000	5	6570969	0.0220082		7200000	5	7331559	0.015068		19900000	4	3954084	0.0281533
10800000	5	11810651	0.0132069		20800000	5	7156929	0.016255		7300000	5	10049511	0.013853		20000000	4	3512937	0.0277864
10900000	5	9665780	0.0131828		20900000	5	5858663	0.0191847		7400000	5	10399097	0.0125923		20100000	4	3774064	0.0512807
11000000	5	9410891	0.0141796		21000000	5	4263542	0.0212928		7500000	5	8992084	0.0126228		20200000	4	3188053	0.0616424
11100000	5	7368997	0.0124805		21100000	5	2551481	0.0370653		7600000	5	9096774	0.0122718		20300000	4	3670138	0.0337832
11200000	5	7541570	0.020069		21200000	5	1415898	0.0520003		7700000	5	7168304	0.0128749		20400000	4	4877030	0.0410673
11300000	5	8176402	0.0186989		21300000	5	1216202	0.0749412		7800000	5	5847210	0.0153756		20500000	4	4946569	0.0754976
11400000	5	9087640	0.0151234		21400000	5	304353	0.125746		7900000	5	4420911	0.0125587		20600000	4	5528445	0.066247
11500000	5	8487122	0.0142128		21500000	5	0			8000000	5	4610426	0.0129605		20700000	4	3427182	0.0518715
11600000	5	11336714	0.0120756							8100000	5	6569593	0.0126625		20800000	4	4855519	0.0473816
11700000	5	9633912	0.0126798							8200000	5	6968931	0.0146941		20900000	4	5078935	0.04298
11800000	5	11255088	0.0116667							8300000	5	7000141	0.0145248		21000000	4	6170132	0.0712417
11900000	5	9740581	0.0128074							8400000	5	6302858	0.0139323		21100000	4	6080638	0.0696688
12000000	5	10621606	0.0129957							8500000	5	5193391	0.0128309		21200000	4	5872378	0.0640201
12100000	5	8961314	0.0135603							8600000	5	5380870	0.015503		21300000	4	4940907	0.0573402
12200000	5	9830620	0.0132128							8700000	5	4110915	0.0156141		21400000	4	4717227	0.0826973
12300000	5	6389058	0.0204284							8800000	5	5234391	0.0133207		21500000	4	3367271	0.0917526
12400000	5	6404758	0.0181222							8900000	5	4908311	0.0132645		21600000	4	3654983	0.0801424
12500000	5	6362806	0.0144623							9000000	5	5495824	0.0130316		21700000	4	4393416	0.0826084
12600000	5	7841203	0.0133183							9100000	5	7308854	0.0142638		21800000	4	3584893	0.0841781
12700000	5	9133785	0.0147883							9200000	5	6235307	0.0154499		21900000	4	4552853	0.0653861
12800000	5	7365125	0.0149985							9300000	5	6663061	0.0142697		22000000	4	3695374	0.0454074
12900000	5	7267467	0.0153394							9400000	5	7641346	0.01298		22100000	4	3336692	0.0387077
13000000	5	7682957	0.0141688							9500000	5	8613955	0.0122574		22200000	4	4865426	0.0507614
13100000	5	6687420	0.0164178							9600000	5	7639414	0.0127548		22300000	4	4792771	0.0489511
13200000	5	9012913	0.015555							9700000	5	8093329	0.0147467		22400000	4	2744703	0.0463893
13300000	5	8431665	0.0128233							9800000	5	8410575	0.0157666		22500000	4	2558251	0.0447769
13400000	5	8299678	0.0122504							9900000	5	8075913	0.0157793		22600000	4	3284056	0.0479631
13500000	5	7139069	0.013248							10000000	5	9123160	0.0154873		22700000	4	3547907	0.037296
13600000	5	8579011	0.0142742							10100000	5	9544475	0.0138209		22800000	4	4524072	0.0342771
13700000	5	8203234	0.0151235							10200000	5	10261366	0.0127119		22900000	4	3391455	0.0346758
13800000	5	8781841	0.0130993							10300000	5	7817945	0.0143435		23000000	4	2702357	0.033445
13900000	5	9037407	0.012924							10400000	5	8912255	0.0119403		23100000	4	3995796	0.0276561
14000000	5	7450038	0.0127133							10500000	5	7617120	0.0124186		23200000	4	3472097	0.0411926
14100000	5	8082971	0.01311							10600000	5	10398517	0.0127674		23300000	4	3024306	0.0486915
14200000	5	8288903	0.0154496							10700000	5	9591069	0.0119381		23400000	4	4013739	0.0581582
14300000	5	9453861	0.0157052							10800000	5	12453305	0.0125693		23500000	4	3065021	0.0557801
14400000	5	8832952	0.0134445							10900000	5	12321032	0.011955		23600000	4	1503744	0.0862441
14500000	5	9375686	0.0121226							11000000	5	10640509	0.0119373		23700000	4	2623492	0.0358002
14600000	5	4435249	0.0122146							11100000	5	14264365	0.0126877		23800000	4	2845027	0.0346232
14700000	5	6257298	0.0127797							11200000	5	9046164	0.0125283		23900000	4	3336599	0.0391034
14800000	5	2581763	0.0114419							11300000	5	11641553	0.0122325		24000000	4	2947413	0.0489659
14900000	5	9425094	0.0133489							11400000	5	10182089	0.0137631		24100000	4	3258465	0.0265144
15000000	5	9317160	0.0137303							11500000	5	10608161	0.012511		24200000	4	3247303	0.041123
15100000	5	8668452	0.0146978							11600000	5	11734290	0.0129285		24300000	4	3705446	0.028882
15200000	5	7973897	0.0128452							11700000	5	14052599	0.0118433		24400000	4	5080659	0.0320383
15300000	5	7528072	0.0148973							11800000	5	13553839	0.0130112		24500000	4	4944932	0.0281179
15400000	5	6775553	0.0173092							11900000	5	12450057	0.0118424		24600000	4	5256764	0.0286345
15500000	5	5461276	0.0156792							12000000	5	13613874	0.0126162		24700000	4	4772666	0.0370677
15600000	5	7665971	0.0124997							12100000	5	10560580	0.0120354		24800000	4	5758072	0.0444153
15700000	5	9744569	0.0133661							12200000	5	10190752	0.0125446		24900000	4	4394517	0.030023
15800000	5	10765534	0.0153394							12300000	5	8374379	0.012866		25000000	4	4185938	0.0372314
15900000	5	11752842	0.0153313							12400000	5	8384045	0.0125879		25100000	4	4715986	0.0439741
16000000	5	8433772	0.0135643							12500000	5	7794862	0.0124827		25200000	4	3591423	0.0579808
16100000	5	9182145	0.0125757							12600000	5	7101878	0.0153796		25300000	4	4770965	0.0524726
16200000	5	8373379	0.0132655							12700000	5	6494908	0.0158575		25400000	4	5578988	0.0492264
16300000	5	7775713	0.0158321							12800000	5	5798897	0.0181688		25500000	4	4693681	0.0965511
16400000	5	10125214	0.015251							12900000	5	5752927	0.0160621		25600000	4	5722635	0.111466
16500000	5	9098032	0.0240026							13000000	5	3660145	0.0152068		25700000	4	5807974	0.127217
16600000	5	8923482	0.0216409							13100000	5	3862015	0.0162136		25800000	4	5069781	0.0599306
16700000	5	9831134	0.022211							13200000	5	2879654	0.0189742		25900000	4	5709091	0.0829053
16800000	5	7624823	0.0146047							13300000	5	5052390	0.0187719		26000000	4	4743078	0.0862954
16900000	5	8306600	0.0133931							13400000	5	6786882	0.0160565		26100000	4	4173551	0.0635315
17000000	5	6379310	0.0196446							13500000	5	8878692	0.0128685		26200000	4	3949211	0.0763725
17100000	5	7043386	0.0232993							13600000	5	8518017	0.013315		26300000	4	3393594	0.0601175
17200000	5	5884932	0.0168439							13700000	5	7155883	0.0151133		26400000	4	3525466	0.080488
17300000	5	8764005	0.0234954							13800000	5	6314781	0.0151883		26500000	4	2030634	0.0810856
17400000	5	6408769	0.0290585							13900000	5	8159222	0.0188363		26600000	4	1535215	0.0662431
17500000	5	7025659	0.0279674							14000000	5	8772519	0.0142425		26700000	4	3174283	0.079716
17600000	5	4575909	0.0287324							14100000	5	10469755	0.0166654		26800000	4	1618780	0.0885072
17700000	5	5777760	0.0324034							14200000	5	10378656	0.0153034		26900000	4	499135	0.112015
17800000	5	5870033	0.0318552							14300000	5	8432504	0.0125466		27000000	4	147822	0.356488
17900000	5	6046545	0.0316675							14400000	5	9728201	0.015094		27100000	4	17890	0.523468
18000000	5	7463280	0.0133997							14500000	5	9527615	0.0151583		0	5	2798453	0.0466908
18100000	5	6400218	0.0220259							14600000	5	11339353	0.012999		100000	5	3196149	0.0497248
18200000	5	6725195	0.0248571							14700000	5	11046083	0.0133041		200000	5	3708489	0.0426842
18300000	5	6281754	0.0199297							14800000	5	9367259	0.014227		300000	5	5287443	0.05089
18400000	5	6342393	0.0154278							14900000	5	7782204	0.0140015		400000	5	4006776	0.0578889
18500000	5	6716122	0.0141256							15000000	5	7706357	0.0129476		500000	5	4111273	0.0335072
18600000	5	7886134	0.0125857							15100000	5	8150153	0.0129545		600000	5	4591170	0.034993
18700000	5	9854122	0.0153691							15200000	5	8650554	0.0129785		700000	5	5349170	0.0358768
18800000	5	8269477	0.015613							15300000	5	10039012	0.0135475		800000	5	6040091	0.0321753
18900000	5	9099049	0.014515							15400000	5	9612897	0.0125073		900000	5	6077898	0.0185844
19000000	5	6549720	0.0144633							15500000	5	10706324	0.0127732		1000000	5	5696433	0.0208527
19100000	5	8772202	0.0150276							15600000	5	10161641	0.0129407		1100000	5	4886803	0.0240884
19200000	5	8364700	0.0224166							15700000	5	8786774	0.0130673		1200000	5	5622294	0.0241724
19300000	5	11648587	0.0235357							15800000	5	9807302	0.0128993		1300000	5	3955876	0.0228892
19400000	5	5066736	0.027156							15900000	5	8528626	0.0124847		1400000	5	4504631	0.0227226
19500000	5	5767869	0.0312717							16000000	5	7763380	0.0132391		1500000	5	3581710	0.0294542
19600000	5	2122007	0.0377878							16100000	5	9182470	0.0121929		1600000	5	2292682	0.0519987
19700000	5	6902892	0.0344947							16200000	5	7876028	0.0131381		1700000	5	2540505	0.0490001
19800000	5	6418969	0.0292292							16300000	5	10884250	0.0122259		1800000	5	2722261	0.0567267
19900000	5	6579224	0.0303733							16400000	5	7773629	0.0129065		1900000	5	3540119	0.0384815
20000000	5	6270754	0.023367							16500000	5	8983606	0.0128071		2000000	5	4060030	0.0264246
20100000	5	5869620	0.0179685							16600000	5	6756869	0.0137316		2100000	5	4301162	0.0250582
20200000	5	6509990	0.0270675							16700000	5	5643676	0.0184475		2200000	5	3181947	0.0282902
20300000	5	3614611	0.0249729							16800000	5	7984053	0.0202711		2300000	5	2565086	0.0375628
20400000	5	1386516	0.0274357							16900000	5	5634784	0.0187173		2400000	5	2566595	0.0346276
20500000	5	626867	0.041107							17000000	5	10168997	0.0152234		2500000	5	3742133	0.0379138
20600000	5	153768	0.0853288							17100000	5	4601290	0.012227		2600000	5	3221473	0.0292711
20700000	5	109728	0.152641							17200000	5	5204782	0.0140613		2700000	5	7227073	0.0185835
20800000	5	77204	0.0908905							17300000	5	3869363	0.0148961		2800000	5	6129775	0.0193932
20900000	5	152549	0.12415							17400000	5	6009608	0.0134267		2900000	5	6929752	0.0214093
21000000	5	327188	0.100607							17500000	5	8615368	0.0127588		3000000	5	7527525	0.0234614
21100000	5	574675	0.100117							17600000	5	4678293	0.0121324		3100000	5	7022337	0.0270261
21200000	5	443353	0.104439							17700000	5	7899345	0.0188362		3200000	5	6502066	0.0319437
21300000	5	391962	0.0899716							17800000	5	1462405	0.0157189		3300000	5	4977699	0.0310918
21400000	5	200328	0.161309							17900000	5	11871087	0.0198929		3400000	5	4776533	0.0229383
21500000	5	119378	0.0799893							18000000	5	14008324	0.0264549		3500000	5	5674272	0.0241107
21600000	5	57564	0.101387							18100000	5	11133462	0.022004		3600000	5	6687305	0.0243483
21700000	5	35928	0.0388526							18200000	5	13445353	0.0181045		3700000	5	6453938	0.0203511
21800000	5	15760	0.0531942							18300000	5	11731295	0.0153435		3800000	5	8946336	0.0187739
21900000	5	35729	0.0395141							18400000	5	9661140	0.0227788		3900000	5	6227716	0.0317993
22000000	5	1971	0.0608678							18500000	5	7522088	0.0214505		4000000	5	7148207	0.0214978
22100000	5	8721	0.120419							18600000	5	8010472	0.0148198		4100000	5	7685804	0.0342787
22200000	5	13508	0.0313232							18700000	5	5269123	0.0143264		4200000	5	7933523	0.0374255
22300000	5	258	0.0764305							18800000	5	8364337	0.0272532		4300000	5	8035857	0.0342004
22400000	5	92	0.0249689							18900000	5	11034679	0.0184583		4400000	5	5450427	0.031041
22500000	5	340	0.0611803							19000000	5	8843378	0.0176741		4500000	5	3822599	0.0385811
22600000	5	0								19100000	5	9127269	0.0226631		4600000	5	5325670	0.0247843
22700000	5	3888	0.0964643							19200000	5	6849147	0.0170956		4700000	5	4615921	0.0229085
22800000	5	7646	0.0229472							19300000	5	7536446	0.0139093		4800000	5	6152058	0.0150872
22900000	5	41604	0.0499772							19400000	5	5539915	0.013186		4900000	5	5625403	0.018643
23000000	5	12258	0.0212858							19500000	5	9249271	0.0135617		5000000	5	6778367	0.0166094
23100000	5	21293	0.0436678							19600000	5	7117860	0.0166855		5100000	5	6423051	0.0163553
23200000	5	16985	0.109763							19700000	5	8584550	0.0129251		5200000	5	6119975	0.0240409
23300000	5	17331	0.0730538							19800000	5	7508969	0.0151341		5300000	5	5814576	0.0167222
23400000	5	6391	0.0331771							19900000	5	9633939	0.0147713		5400000	5	5907343	0.0171086
23500000	5	0								20000000	5	8153428	0.0149955		5500000	5	6995829	0.013484
										20100000	5	7528200	0.0155666		5600000	5	8906334	0.0175977
										20200000	5	7224845	0.0169026		5700000	5	8904180	0.0153661
										20300000	5	7522523	0.0194826		5800000	5	10350817	0.0151135
										20400000	5	8344289	0.0136153		5900000	5	9677765	0.0145485
										20500000	5	6554151	0.0167145		6000000	5	7936251	0.0131203
										20600000	5	5229738	0.0330253		6100000	5	7444725	0.0136401
										20700000	5	3898862	0.0304609		6200000	5	8289828	0.0134379
										20800000	5	2743024	0.0385668		6300000	5	6206569	0.0136521
										20900000	5	3839292	0.042769		6400000	5	6317099	0.0132836
										21000000	5	2712435	0.0522747		6500000	5	6677765	0.0128014
										21100000	5	4193695	0.0643037		6600000	5	6791375	0.0141366
										21200000	5	2905488	0.0446713		6700000	5	9106290	0.0145336
										21300000	5	2323466	0.0376948		6800000	5	5983385	0.0126504
										21400000	5	1790943	0.0449499		6900000	5	10058219	0.0136237
										21500000	5	1378152	0.0327369		7000000	5	7117889	0.0123359
										21600000	5	1846297	0.0486978		7100000	5	10243849	0.0122273
										21700000	5	1762882	0.0484174		7200000	5	8384140	0.0122206
										21800000	5	1805308	0.0545864		7300000	5	7805818	0.0124887
										21900000	5	3700715	0.0489271		7400000	5	9106881	0.0117985
										22000000	5	3899369	0.036564		7500000	5	8171455	0.0133935
										22100000	5	6369441	0.0295554		7600000	5	10529165	0.0147775
										22200000	5	7676359	0.0201717		7700000	5	10167918	0.0309711
										22300000	5	5103582	0.0317254		7800000	5	12185010	0.026558
										22400000	5	847662	0.0540046		7900000	5	8863698	0.0267492
										22500000	5	198976	0.0428096		8000000	5	8526126	0.019666
										22600000	5	251	0.0263547		8100000	5	6549228	0.0214907
										22700000	5	6315	0.0484613		8200000	5	7202084	0.0161391
										22800000	5	3128	0.0782669		8300000	5	8218692	0.0158289
										22900000	5	37505	0.044456		8400000	5	7068976	0.0207136
										23000000	5	163491	0.137129		8500000	5	6315472	0.0400376
										23100000	5	187077	0.273947		8600000	5	4945817	0.0274259
										23200000	5	77892	0.149213		8700000	5	5225627	0.014793
										23300000	5	20778	0.0223832		8800000	5	6821172	0.0169961
										23400000	5	70243	0.0317895		8900000	5	7270352	0.0245397
										23500000	5	32892	0.0566204		9000000	5	7848292	0.0219886
										23600000	5	79528	0.0406169		9100000	5	6692163	0.0138142
										23700000	5	971	0.0802584		9200000	5	8544193	0.0144126
										23800000	5	12064	0.045887		9300000	5	6764467	0.012636
										23900000	5	10582	0.0481933		9400000	5	7849354	0.0133282
										24000000	5	18588	0.00978109		9500000	5	8297412	0.0147643
										24100000	5	4375	0.0331077		9600000	5	8590244	0.0128402
										24200000	5	0			9700000	5	7977428	0.0140866
															9800000	5	7777724	0.0125297
															9900000	5	6143516	0.0120072
															10000000	5	7785561	0.0123267
															10100000	5	7144229	0.0124794
															10200000	5	9495736	0.0118842
															10300000	5	8123307	0.0143888
															10400000	5	8878812	0.0138947
															10500000	5	10957440	0.0129745
															10600000	5	10313966	0.012257
															10700000	5	9654306	0.0145787
															10800000	5	9744868	0.0125898
															10900000	5	6721623	0.0128763
															11000000	5	9833775	0.0130314
															11100000	5	8842428	0.013696
															11200000	5	8919194	0.0116825
															11300000	5	9613734	0.0131252
															11400000	5	8884051	0.0127062
															11500000	5	6795824	0.0129582
															11600000	5	5061155	0.0127572
															11700000	5	4302495	0.0182999
															11800000	5	5141683	0.0188007
															11900000	5	7906060	0.042486
															12000000	5	9226838	0.0487718
															12100000	5	7220836	0.0527225
															12200000	5	8567963	0.0227239
															12300000	5	7242161	0.0437172
															12400000	5	6756216	0.0796644
															12500000	5	7004654	0.0675122
															12600000	5	6365485	0.0356018
															12700000	5	7600638	0.0273219
															12800000	5	6609435	0.0196108
															12900000	5	7826562	0.0169399
															13000000	5	7706484	0.0228699
															13100000	5	7625222	0.0168032
															13200000	5	8713693	0.0133765
															13300000	5	7541286	0.013027
															13400000	5	7591467	0.0143682
															13500000	5	6467791	0.0127125
															13600000	5	5501953	0.0145779
															13700000	5	5698790	0.0133407
															13800000	5	4242327	0.0145935
															13900000	5	6217359	0.0159145
															14000000	5	4056616	0.0173963
															14100000	5	7906062	0.0176177
															14200000	5	7104796	0.0143332
															14300000	5	8378111	0.0130094
															14400000	5	7504050	0.0161701
															14500000	5	6200540	0.0147498
															14600000	5	7121401	0.0132929
															14700000	5	6644277	0.0130458
															14800000	5	10937939	0.0121109
															14900000	5	8777398	0.0118296
															15000000	5	7440494	0.0122303
															15100000	5	8386510	0.0120743
															15200000	5	5829536	0.0114262
															15300000	5	8750441	0.0118851
															15400000	5	6663633	0.0116676
															15500000	5	7387218	0.0119207
															15600000	5	7870400	0.0119763
															15700000	5	8404323	0.011569
															15800000	5	11339666	0.0115534
															15900000	5	9544862	0.0121637
															16000000	5	11088074	0.012604
															16100000	5	8633034	0.0115664
															16200000	5	11025172	0.0116939
															16300000	5	9156396	0.0128267
															16400000	5	8806097	0.0118843
															16500000	5	6514795	0.0122876
															16600000	5	5859005	0.0118923
															16700000	5	4205288	0.012371
															16800000	5	5806347	0.0120964
															16900000	5	5287844	0.0125408
															17000000	5	7433342	0.0123512
															17100000	5	5751977	0.0106479
															17200000	5	10219431	0.0124108
															17300000	5	8142649	0.0136885
															17400000	5	7754653	0.0157687
															17500000	5	6887450	0.0180284
															17600000	5	5057046	0.0200371
															17700000	5	6859613	0.0122329
															17800000	5	5210475	0.0121234
															17900000	5	8475568	0.0126886
															18000000	5	7510623	0.0128753
															18100000	5	6761846	0.0124177
															18200000	5	6493295	0.0129323
															18300000	5	5762371	0.0119437
															18400000	5	8400028	0.0119457
															18500000	5	7200514	0.0120405
															18600000	5	6391104	0.0117397
															18700000	5	6480642	0.0119854
															18800000	5	4649638	0.0135544
															18900000	5	4312998	0.0118942
															19000000	5	4279185	0.0110614
															19100000	5	4269713	0.0113209
															19200000	5	6934425	0.0128104
															19300000	5	6771900	0.0117172
															19400000	5	8080563	0.0126938
															19500000	5	6425170	0.0120488
															19600000	5	9008120	0.0141347
															19700000	5	7953495	0.0126267
															19800000	5	7162926	0.0123757
															19900000	5	6774600	0.0124298
															20000000	5	5873132	0.0124916
															20100000	5	5619657	0.0160422
															20200000	5	6561481	0.0138766
															20300000	5	6062914	0.0124477
															20400000	5	8929375	0.0152529
															20500000	5	8112868	0.01777
															20600000	5	7822684	0.0171922
															20700000	5	7634792	0.0125768
															20800000	5	8599456	0.0139624
															20900000	5	9259157	0.0139017
															21000000	5	10114703	0.0182099
															21100000	5	9483998	0.021248
															21200000	5	9252143	0.0184767
															21300000	5	7849743	0.0199553
															21400000	5	6614742	0.0268995
															21500000	5	6285132	0.0296726
															21600000	5	6001448	0.0258301
															21700000	5	7109679	0.0275106
															21800000	5	6792691	0.0269693
															21900000	5	6275628	0.019049
															22000000	5	6830557	0.0154127
															22100000	5	6193581	0.0145416
															22200000	5	6931244	0.0144418
															22300000	5	6465264	0.0143824
															22400000	5	5568181	0.015457
															22500000	5	4126995	0.0128903
															22600000	5	6394094	0.0131716
															22700000	5	5921579	0.0132681
															22800000	5	5895682	0.0115075
															22900000	5	6084274	0.0111854
															23000000	5	5424981	0.0120155
															23100000	5	5558269	0.0123372
															23200000	5	6109870	0.0148357
															23300000	5	5641666	0.0176981
															23400000	5	4373611	0.0165368
															23500000	5	4844064	0.0196171
															23600000	5	3348598	0.0195505
															23700000	5	4217004	0.013342
															23800000	5	5183632	0.013575
															23900000	5	5119113	0.0152332
															24000000	5	5334556	0.0127233
															24100000	5	5461280	0.0132187
															24200000	5	6626506	0.0134841
															24300000	5	6551995	0.0121328
															24400000	5	7978754	0.0132314
															24500000	5	8372112	0.01217
															24600000	5	8789532	0.0119335
															24700000	5	8901648	0.0133132
															24800000	5	7664085	0.013016
															24900000	5	8609175	0.0119691
															25000000	5	6288653	0.0135178
															25100000	5	6982763	0.0142742
															25200000	5	7586135	0.0165902
															25300000	5	7286341	0.0128662
															25400000	5	9555418	0.0182384
															25500000	5	8763062	0.0334828
															25600000	5	8819750	0.0415648
															25700000	5	10176236	0.027962
															25800000	5	8462344	0.0169577
															25900000	5	8025842	0.0288132
															26000000	5	8346146	0.0318973
															26100000	5	6160121	0.020918
															26200000	5	6441517	0.0182683
															26300000	5	5051078	0.0160992
															26400000	5	3729618	0.0267882
															26500000	5	4728096	0.0214924
															26600000	5	2631157	0.0230375
															26700000	5	2982569	0.0297847
															26800000	5	1215781	0.0450016
															26900000	5	441335	0.0553099
															27000000	5	40709	0.206371
															27100000	5	0

## Sheet: summary stats
2L	Variable cat N Mean Median				X
	r2 0 235 0.53953 0.50131				Variable cat N Mean Median
	1 235 0.39104 0.37059				r2 0 208 0.63955 0.61778
	2 235 0.29081 0.27310				1 208 0.52199 0.49645
	3 235 0.19011 0.17021				2 208 0.40980 0.37787
	4 235 0.06062 0.04773				3 209 0.25109 0.21396
	5 234 0.02384 0.01463				4 209 0.06355 0.03668
					5 207 0.01935 0.01221
2R	Variable cat N Mean Median
	r2 0 215 0.54122 0.51835
	1 214 0.39994 0.37986
	2 215 0.30223 0.28537
	3 215 0.19746 0.18040
	4 216 0.05978 0.04502
	5 215 0.02410 0.01394
3L	Variable cat N Mean Median
	r2 0 242 0.50700 0.49017
	1 242 0.37432 0.35283
	2 243 0.27441 0.25365
	3 243 0.18307 0.16640
	4 242 0.06297 0.04677
	5 242 0.02200 0.01512
3R	Variable cat N Mean Median
	r2 0 272 0.48836 0.47185
	1 272 0.34993 0.33720
	2 272 0.24934 0.23818
	3 272 0.16684 0.15694
	4 272 0.05889 0.04899
	5 271 0.020460 0.014764
